# Supplementary material for: Bmal1 integrates mitochondrial metabolism and macrophage activation
Source: eLife journal article supplement (doi:10.7554/elife.54090), 2020-05-12
Supplement: supp [file elife-54090-supp-v1.zip]

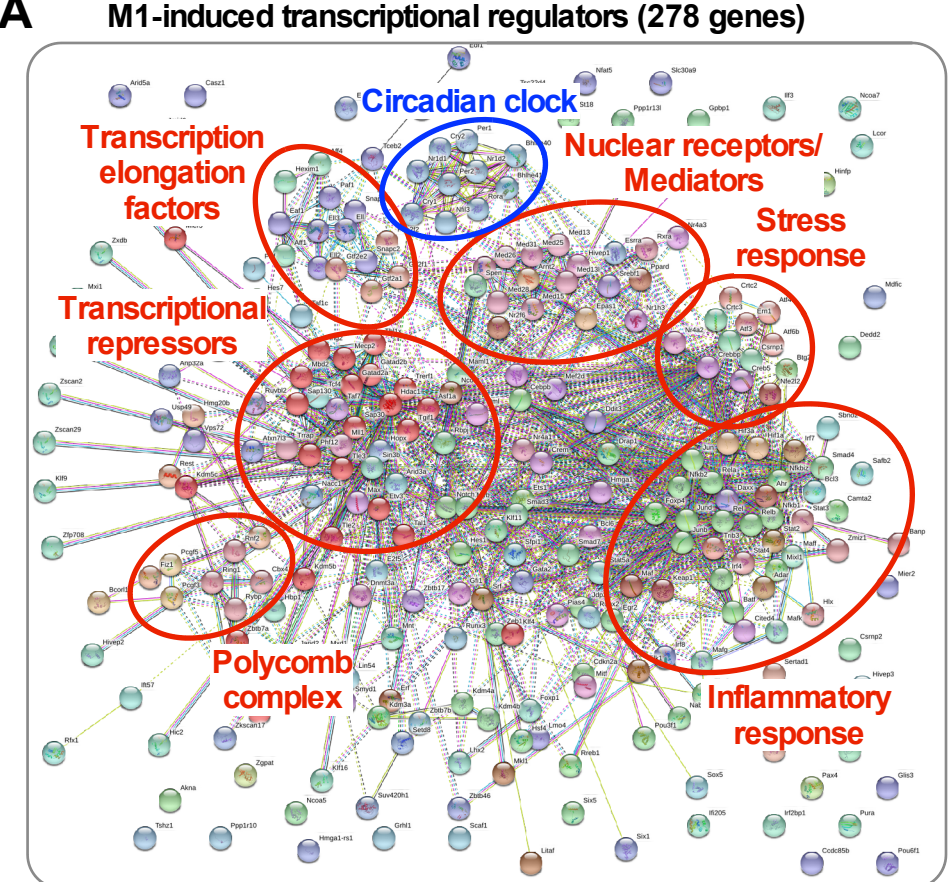

| Inflammatory response | Stress response | Nuclear receptors | Circadian clock |
|-----------------------|-----------------|-------------------|-----------------|
| Nfkb1                 | Hif1a           | Lxra              | Per1            |
| Nfkb2                 | Creb5           | Lxrb              | Rora            |
| Rela                  | Hif3a           | Ppard             | Per2            |
| Relb                  | Crebbp          | Rxra              | Bhlhe40         |
| Irf4                  | Nfe2l2          |                   | Cry1            |
| Irf7                  | Atf3            |                   | Cry2            |
|                       | Atf4            |                   | Nfil3           |
|                       | Atf6b           |                   | Nr1d1           |
|                       |                 |                   | Nr1d2           |

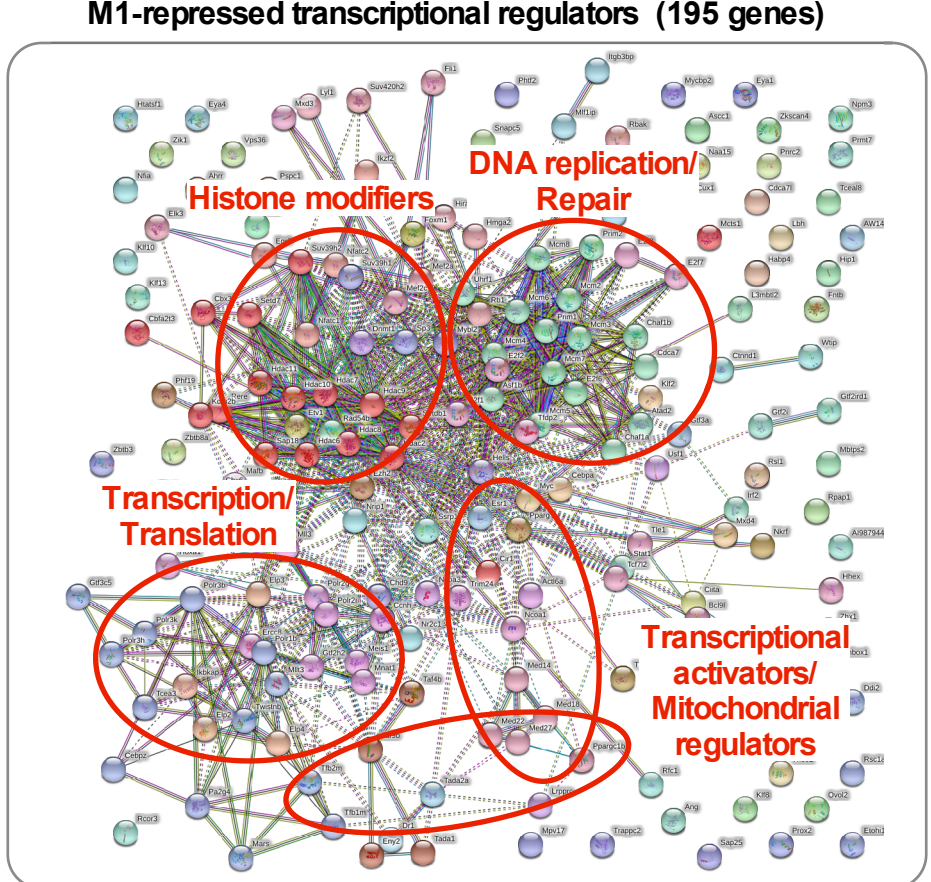

| Histone modifiers | DNA replication/repair | Transcription/Translation | Mitochondrial regulators |
|-------------------|------------------------|---------------------------|--------------------------|
| Hdac2             | Mcm2                   | Polr1b                    | Myc                      |
| Hdac11            | Prim2                  | Polr3k                    | Pparg                    |
| Hdac6             | Mcm3                   | Polr2g                    | Ppargc1b                 |
| Sap18             | Chaf1a                 | Elp2                      | Tfb1m                    |
| Suv39h1           | Chaf1b                 | Elp3                      | Tfb2m                    |
| Suv39h2           | Rad54b                 | Elp4                      | Lrpprc                   |
| Hdac9             | Mcm5                   | Polr3b                    |                          |
| Hdac10            | Mcm7                   | Polr3h                    |                          |
|                   | Mcm8                   |                           |                          |

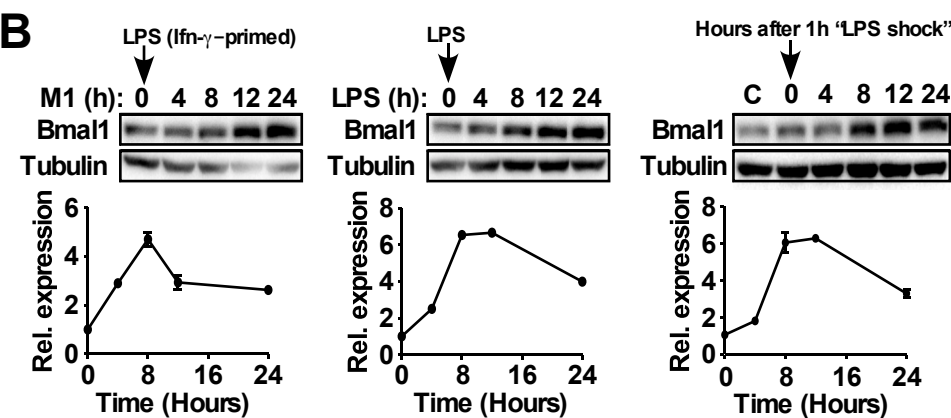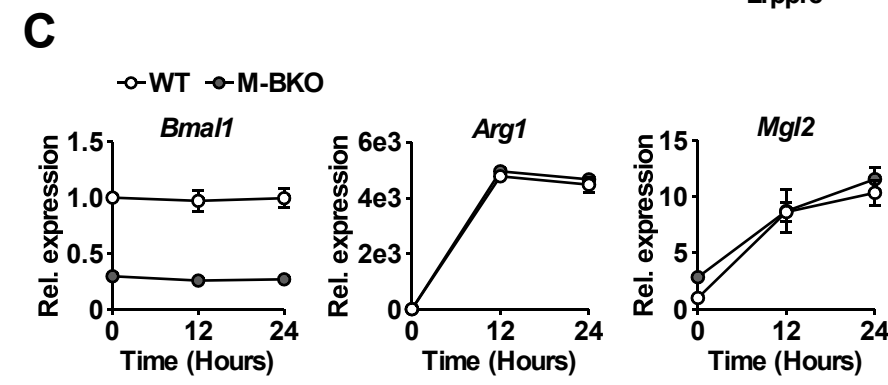

Fig. 1 Supplemental figure 1
