# Supplementary material for: Bmal1 integrates mitochondrial metabolism and macrophage activation
Source: eLife journal article supplement (doi:10.7554/elife.54090), 2020-05-12
Supplement: supp [file elife-54090-supp-v1.zip]

Archive with 10 entries (10 files):
- elife_poa_e54090_Figure_1_figure_supplement_1.pdf
- elife_poa_e54090_Figure_2_figure_supplement_1.pdf
- elife_poa_e54090_Figure_4_figure_supplement_1.pdf
- elife_poa_e54090_Figure_5_figure_supplement_1.pdf
- elife_poa_e54090_Figure_6_figure_supplement_1.pdf
- elife_poa_e54090_Figure_7_figure_supplement_1.pdf
- elife_poa_e54090_Figure_3_source_data_1.xlsx
- elife_poa_e54090_Figure_5_source_data_1.xlsx
- elife_poa_e54090_Transparent_Reporting_File.docx
- elife_poa_e54090_Supplementary_file_1.docx
