# Supplementary material for: Bmal1 integrates mitochondrial metabolism and macrophage activation
Source: eLife journal article supplement (doi:10.7554/elife.54090), 2020-05-12
Supplement: supp [file elife-54090-supp-v1.zip › elife_poa_e54090_Figure_3_source_data_1.xlsx]

## Sheet: Sheet 1
Figure 3 source data 1. Metabolomics data for WT and M-BKO M1-activated macrophages.
Data from each sample are normalized to total protein content, and each metabolite is normalized to the average of the WT Ifng only samples
Metabolite name	KEGG ID	WT Ifng only-1	WT Ifng only-2	WT Ifng only-3	WT Ifng only-4	WT M1 6h-1	WT M1 6h-2	WT M1 6h-3	WT M1 6h-4	WT M1 12h-1	WT M1 12h-2	WT M1 12h-3	WT M1 12h-4	M-BKO Ifng only-1	M-BKO Ifng only-2	M-BKO Ifng only-3	M-BKO Ifng only-4	M-BKO M1 6h-1	M-BKO M1 6h-2	M-BKO M1 6h-3	M-BKO M1 6h-4	M-BKO M1 12h-1	M-BKO M1 12h-2	M-BKO M1 12h-3	M-BKO M1 12h-4	TTEST P val (WT vs M-BKO Ifng only)	TTEST P val (WT vs M-BKO M1 6h)	TTEST P val (WT vs M-BKO M1 12h)	2-WAY ANOVA P val (WT vs M-BKO)
1-Methylgalactose		1	0.648805	0.903161	0.156982	1.4538	1.29361	1.05447	1.8684	0.745623	0.654685	0.598662	0.926688	0.908015	0.741941	0.797943	1.70343	1.44132	1.30449	2.68751	2.24355	1.53031	1.43704	0.599806	0.702114	0.264796	0.225289	0.231682	0.0384
1-Monoolein		1	0.936772	0.820228	1.42228	1.95371	1.79906	1.69865	1.31575	0.80335	0.872626	1.05513	0.871351	1.14091	1.00944	0.749078	1.16932	2.05825	2.06466	1.96421	1.67208	1.39969	1.63301	1.18389	1.43346	0.870582	0.181632	0.003	0.01
1-Monostearin	D01947	1	0.604779	0.594616	0.809917	1.12617	1.97611	1.13296	1.41574	0.868374	0.932249	0.822669	1.15487	0.922173	0.721513	0.589097	0.759546	0.560078	1.57363	1.23285	1.64393	0.994738	1.41732	0.927195	0.633643	0.972518	0.632601	0.793203	0.7661
2-Deoxypentitol		1	0.710379	0.730713	0.754519	1.48203	1.07518	1.84778	1.49769	2.03681	1.64499	2.28028	2.37668	0.808	0.911871	0.611349	1.16499	2.30919	1.94145	1.96275	2.29504	2.93966	3.06839	3.39212	3.00605	0.59429	0.013257	0.00181179	<0.0001
2-Hydroxyglutaric acid	C02630	1	2.04586	1.82918	0.801778	1.51197	0.709063	1.92345	1.82005	2.34687	2.53778	3.20923	2.59128	1.52214	2.29327	1.78358	2.65991	2.68436	2.27725	0.467788	2.22502	4.57748	2.91992	4.28115	2.18638	0.155657	0.482344	0.217538	0.053
2-Monoolein		1	0.671271	0.592958	1.04338	1.5844	1.42226	1.45636	1.46316	0.613649	0.927975	0.77857	0.548013	0.522054	0.701795	0.669811	0.850335	1.67181	1.60486	0.256651	1.59611	1.13864	1.34236	0.914935	0.777618	0.327973	0.583788	0.073763	0.9728
2-Monopalmitin		1	0.708919	0.720373	1.06121	1.59583	1.46182	1.3919	1.56819	0.586076	1.01935	0.909239	0.707915	0.552438	0.759981	0.509521	1.08118	1.65723	1.556	1.78307	1.69911	1.40832	1.42873	1.04116	1.1872	0.393306	0.0444248	0.0141295	0.0408
2,5-Dihydroxypyrazine		1	1.19103	0.821865	1.45153	1.42782	2.04651	2.57987	2.68212	3.07326	3.05817	3.01037	3.9523	1.04518	0.145615	0.987875	1.27857	2.58806	2.62192	2.10636	3.34462	4.01738	4.70964	4.31826	4.83925	0.4063	0.257754	0.00656298	0.0203
3-Aminoisobutyric acid	C05145	1	0.459021	0.787187	0.9287	2.18385	2.06901	1.37421	1.71403	0.838794	0.644116	1.70881	0.830218	2.18104	0.941359	1.38535	1.53079	2.03538	2.86067	1.86539	1.23451	1.40232	1.22976	0.950537	1.32842	0.044807	0.683064	0.422705	0.0567
3-Hydroxy-3-methylglutaric acid	C03761	1	0.907144	0.524674	1.16624	2.31757	2.32011	2.626	4.14385	5.54987	4.72888	6.48741	5.5132	2.17577	1.5612	1.65646	2.35148	7.00613	7.03981	7.95105	6.9404	10.51	6.5968	8.91853	5.99435	0.00463947	0.000119732	0.0700049	<0.0001
3-Phosphoglycerate	C00597	1	0.618686	0.65532	1.40247	3.2124	2.29725	1.08393	1.82279	0.520958	0.409351	0.515071	0.615827	1.27364	0.938018	0.724029	0.844206	3.29567	3.38933	2.07993	1.59039	0.76638	0.758655	0.899135	1.1069	0.909208	0.471677	0.00704581	0.209
4-Hydroxybutyric acid	C00989	1	1.36982	1.79294	0.897147	1.48558	0.980135	1.28786	2.87129	1.32383	1.51194	0.968872	1.34705	1.90255	1.99852	1.59633	1.71484	4.14519	5.83105	3.14615	2.44791	2.59475	0.601329	2.50935	1.07619	0.0519503	0.0381686	0.460664	0.0057
5-Aminovaleric acid	C00431	1	0.816991	1.00488	0.857422	0.853676	0.527171	0.892719	0.49871	0.748982	0.81664	0.916876	1.00328	1.04549	1.32259	1.04421	0.925547	0.974108	1.21559	1.05629	0.916307	1.37909	1.35562	1.34401	0.99405	0.141038	0.0301893	0.0101383	0.0001
5-Methoxytryptamine	C05659	1	0.925862	1.34983	1.6423	1.03802	1.12704	0.720355	1.29281	0.653647	0.762694	0.756439	0.65302	1.35441	1.74262	1.1813	1.32414	1.83135	3.56036	2.1491	1.27624	1.56283	0.878453	1.18968	0.635125	0.435188	0.0599983	0.12639	0.0091
6(5h)-Benzo[c]phenanthridinone, 11,12-dihydro		1	0.891063	0.853448	0.652802	0.408282	0.2665	0.379979	0.318922	0.457513	0.613959	0.67981	0.743871	0.60386	1.07108	0.440503	0.990984	0.528506	0.352678	0.765687	0.395501	0.741446	0.738151	0.978938	0.705427	0.680183	0.139468	0.106567	0.2363
Aconitic acid	C00417	1	0.885449	0.683273	1.32941	0.814833	0.963381	0.98453	1.45585	0.556047	0.975107	0.679206	0.919735	0.932317	0.727475	0.862901	1.24924	1.09506	1.05993	0.65671	0.917111	0.656933	0.867221	0.709653	1.08723	0.862605	0.500732	0.741937	0.7096
Adenine	C00147	1	3.85365	4.05109	4.43565	5.72872	4.91767	4.71456	6.55297	3.02495	4.37498	4.68077	5.01243	4.52847	4.47793	4.33797	5.36687	5.62351	8.02672	7.20009	5.69362	6.18232	4.80237	6.0093	5.41965	0.153271	0.160725	0.0479084	0.0056
Adenosine	C00212	1	5.05576	12.4638	4.32289	5.33711	5.70003	1.07044	7.957	2.55001	0.922585	1.8303	2.12845	3.61817	7.81758	6.97188	27.0613	5.05608	10.7078	4.11227	1.39818	3.14114	1.53248	2.0957	1.55445	0.36969	0.904929	0.677506	0.3424
Adenosine-5-monophosphate	C00020	1	0.898716	1.42486	0.718412	1.45589	0.935894	1.69134	0.524867	1.29857	1.09312	1.57069	1.58283	1.6891	2.37623	1.00047	2.05096	1.88341	1.71485	1.07207	0.477242	1.46138	1.99076	2.25946	2.40801	0.0592388	0.756016	0.0360314	0.016
Alanine	C00041	1	0.582448	0.837367	0.934207	1.14552	0.964059	1.37413	0.824126	0.606986	0.749249	0.888531	0.674922	1.37463	0.679279	0.938123	0.799133	1.28355	1.37044	1.10474	0.968472	0.738915	0.818599	0.732375	0.779179	0.560313	0.508532	0.578211	0.3091
Alanine-alanine	C00993	1	0.424614	1.16206	1.18792	1.6911	0.812564	0.918369	0.8901	0.61021	0.763478	0.887795	0.39843	0.868401	0.89593	0.543278	1.72804	1.30419	1.0714	1.72577	1.27523	1.12263	0.715648	0.959202	0.760168	0.839764	0.323131	0.163283	0.2026
Alpha-aminoadipic acid	C00956	1	1.32361	0.638062	1.01135	1.54431	1.27965	1.73419	1.37959	0.562662	1.88644	2.97061	2.60802	1.51925	1.61514	1.47321	1.71781	1.06503	2.88186	2.85393	2.35547	3.53525	2.91417	4.06462	0.869668	0.00786042	0.1152	0.376439	0.0373
Aminomalonate	C00872	1	1.21167	1.46488	1.44819	1.07632	0.394328	0.871304	2.15798	0.276096	1.79288	1.48982	1.94119	1.47343	1.46976	1.26327	1.20167	2.31319	2.75614	2.52491	0.845127	1.85505	1.07891	2.44659	1.0223	0.606997	0.134747	0.67269	0.1155
Arachidic acid	C06425	1	1.22029	0.700237	1.0672	1.01677	1.13493	0.99696	0.911441	2.70701	0.76533	1.08008	0.936196	1.05826	1.13759	0.851686	1.18088	1.05863	1.88241	1.22927	1.13277	1.39037	1.14784	1.33813	0.823428	0.662859	0.160941	0.687842	0.7436
Arachidonic acid	C00219	1	0.556769	0.684526	0.995114	0.905149	0.786814	0.83508	0.640507	0.305444	0.401085	0.442086	0.267595	0.975679	0.692936	0.616388	0.967289	0.988208	1.18897	1.38311	1.09557	0.860099	0.946117	0.703446	0.750586	0.979093	0.01018	0.000506708	0.0003
Asparagine	C00152	1	0.683149	0.689277	1.16107	1.05428	0.918978	1.47689	0.751025	0.596784	0.687705	0.588835	0.61057	0.812813	0.5091	0.350819	0.719265	1.16195	1.35467	1.224	1.66492	1.01157	0.924351	0.753457	1.14683	0.12029	0.166604	0.00749219	0.194
Aspartic acid	C00049	1	1.08021	1.03976	1.05332	0.518578	0.393947	0.438327	0.510966	0.352007	0.384174	0.446739	0.40271	0.843157	0.842336	0.774387	0.859866	0.679998	0.69506	0.535286	0.51839	0.558038	0.505981	0.517778	0.478348	0.000150427	0.0429893	0.00368968	0.4865
Benzoic acid	C00180	1	0.155683	0.966752	0.882834	2.17054	1.42677	1.75513	2.0052	0.919439	0.995128	1.42171	0.953422	1.12293	1.18417	1.13273	0.891094	1.0973	2.08551	2.15996	1.74792	1.5726	1.59922	1.5462	0.894253	0.166371	0.826473	0.160603	0.1682
Beta-alanine	C00099	1	1.34261	1.31553	1.09518	0.737727	0.45181	0.942523	0.787379	1.12509	1.23269	1.4172	1.32591	1.18	1.43948	1.10316	1.39662	1.27739	1.29764	1.09796	1.02455	1.57985	1.2657	1.79253	1.24806	0.46421	0.0109709	0.226037	0.0042
Beta-glycerolphosphate	C02979	1	0.747349	1.10497	0.8348	1.11961	0.620246	1.19877	0.982222	1.02129	0.867574	1.2687	1.13308	1.13534	1.30849	1.29524	2.21225	0.979445	1.56026	2.13122	1.46907	1.54992	1.50024	2.26111	2.43039	0.0703074	0.0844324	0.0146207	0.0003
Cholesterol	C00187	1	0.963652	0.911617	1.16224	1.73986	1.7279	1.60033	1.77321	0.935763	0.993089	1.2719	0.982389	1.15792	1.0613	1.04038	1.33779	1.95001	2.09739	1.73316	1.49782	1.36603	1.67952	1.28881	1.40543	0.15777	0.452817	0.0144206	0.0047
Cholesterone	C00599	1	0.858846	1.18899	1.56695	1.20777	0.242665	0.164076	1.49203	1.05204	1.11744	1.00212	1.12707	1.16723	1.25894	0.977715	1.23047	1.61351	1.10518	1.46321	1.26076	1.6501	1.5955	1.37273	1.34233	0.977458	0.150522	0.00243805	0.0218
Citric acid	C00158	1	0.977542	0.870793	1.1636	0.608098	0.486361	0.464097	0.593295	0.523076	0.597143	0.765652	0.740482	1.02241	0.981915	0.911924	1.19712	0.625664	0.75614	0.520386	0.441363	0.738336	0.643853	0.834086	0.681615	0.777336	0.558438	0.377198	0.3118
Citrulline	C00327	1	1.00064	0.705018	0.659265	2.50252	2.32643	3.04649	4.97982	7.90172	7.27482	7.41303	11.579	0.938901	1.06432	0.934933	1.28693	3.42065	2.81773	4.22909	5.10992	9.21281	10.5958	14.1491	12.6716	0.133178	0.419853	0.0824597	0.0293
Creatinine	C00791	1	1.02324	0.728047	1.10723	0.896603	0.723661	1.203	0.867517	0.834059	0.735892	1.12768	1.09484	0.968963	0.771165	0.86334	1.16741	0.853448	0.859593	0.983375	1.08185	0.876574	1.43444	0.986667	1.39172	0.859162	0.855027	0.237521	0.3575
Cysteine	C00097	1	0.431863	0.872857	0.994036	1.23634	0.725241	1.09155	0.933376	1.09985	1.20395	1.68638	1.2328	1.16789	0.895723	0.957842	0.92785	1.79767	1.72421	1.57894	1.33583	2.06768	1.74205	1.78003	1.89645	0.312757	0.0063949	0.00905363	<0.0001
Cystine	C01420	1	0.246565	0.596465	0.857526	1.04951	0.598206	1.37079	0.551782	3.95386	4.67318	3.45237	5.49083	1.01915	0.934287	0.53189	0.878057	2.82011	2.22566	3.46401	3.52199	9.37515	4.00336	5.44725	3.37659	0.432649	0.0011131	0.445243	0.0317
Cytidine-5-monophosphate	C00055	1	6.03724	0.723414	4.62708	2.01887	0.903941	2.10752	4.35091	2.08321	1.66513	1.28551	3.06527	1.40144	0.657562	2.45024	1.383	0.965175	1.05297	6.19592	3.72513	2.34725	1.62451	1.23902	2.50568	0.281939	0.672852	0.850547	0.6047
Cytosin	C00380	1	9.62012	1.16074	7.95049	3.08129	6.69264	5.83781	8.85149	5.92704	3.08855	3.00592	6.19291	3.49352	2.23616	4.7653	2.86363	7.2633	6.44329	6.99246	9.37472	3.36934	6.63281	1.47833	4.23349	0.516918	0.34064	0.666381	0.7899
Dihydrocholesterol	C12978	1	0.898976	0.987126	0.962929	0.530212	1.45616	1.17941	1.45652	1.03108	1.14044	1.16761	0.774944	1.08632	1.05867	0.925547	1.11727	1.8993	1.92926	1.77037	1.49922	1.25404	1.64287	1.29399	1.49527	0.126803	0.0414775	0.0215595	0.0009
Docosahexaenoic acid	C06429	1	0.701655	0.735696	0.960755	1.05442	0.957919	0.796455	0.92399	0.330319	0.557852	0.333632	0.49719	0.860809	0.830537	0.241203	0.924152	1.01076	1.28069	1.24767	1.17924	1.03733	1.1096	0.92854	0.867652	0.471595	0.0220284	0.000417249	0.0051
Epsilon-caprolactam	C06593	1	0.49355	0.695881	0.865305	1.4212	1.64133	2.21443	0.91643	1.01295	0.384383	0.909203	0.443819	2.323	0.866466	0.834301	1.80614	2.34306	1.22503	1.30046	0.942151	1.2188	1.12191	0.801132	1.79775	0.119329	0.822341	0.0817981	0.08
Erythritol	C00503	1	0.948149	0.942291	1.24114	1.19716	1.09839	1.03985	1.01256	0.760548	0.760632	0.980117	0.80975	1.1731	1.08381	0.990608	1.34989	1.40352	1.69264	1.21691	1.08176	1.04452	1.19991	1.08435	1.00855	0.306169	0.107562	0.00844314	0.0031
Ethanolamine	C00189	1	1.26734	1.42681	1.1996	0.810087	0.730818	0.689168	0.982271	0.700863	0.853657	0.799863	0.730711	0.998123	0.945529	0.901146	1.00519	1.19035	1.35759	1.15219	0.852281	1.10128	0.888479	1.12992	0.768581	0.0293596	0.0350251	0.0746281	0.1439
Fructose-6-phosphate	C05345	1	0.212884	0.722981	0.481898	1.15707	0.785602	2.43966	0.438983	1.30308	2.44261	2.28508	1.46196	0.80001	0.731187	0.494298	1.10855	2.06344	1.87675	2.18784	0.743767	3.37667	4.46111	4.02691	3.74226	0.427345	0.385671	0.00148014	0.001
Fucose	C02095	1	1.78131	2.42095	2.84889	2.39115	2.24646	1.06018	0.42754	2.18202	1.22348	2.5012	1.38699	3.05601	1.96683	2.21078	2.98295	2.98679	2.34745	1.06692	2.73604	1.81439	2.05921	1.32042	1.49147	0.308662	0.282141	0.678629	0.2081
Fumaric acid	C00122	1	0.81227	0.826882	1.17887	0.714005	1.16764	1.125	0.287814	0.507256	0.59621	0.516234	0.565067	0.913916	0.745499	0.848315	0.965152	1.14875	1.21245	0.987167	1.03927	0.676963	0.681897	0.616569	0.596593	0.413666	0.244964	0.0179417	0.244
Glucose	C00221	1	0.504956	1.18303	1.33774	1.84159	2.09363	1.36499	2.10258	0.49825	0.993706	0.105685	0.635835	1.06394	0.820219	0.706744	1.04552	2.52811	3.4694	2.8558	1.05647	0.893318	0.601505	1.30907	0.936646	0.645106	0.290379	0.158465	0.1626
Glucose-1-phosphate	C00103	1	0.761122	0.688137	1.04871	1.29203	0.215317	1.27569	0.694522	0.72125	0.514892	0.785495	0.809019	0.679989	0.39385	0.597416	1.00999	0.647404	0.608994	1.0796	1.23153	0.802255	1.85937	0.826527	1.78535	0.237675	0.943	0.0871291	0.3555
Glucose-6-phosphate	C00092	1	0.0106198	0.527793	0.448668	0.64844	0.0672497	1.00561	0.0280354	0.675256	1.82817	0.971275	0.595287	0.466739	0.3317	0.0457638	0.540247	0.996683	1.0541	1.27296	0.581018	1.76397	2.07741	2.12339	1.89697	0.536957	0.0999898	0.0180491	0.0101
Glutamic acid	C00025	1	0.729144	0.975714	0.981658	0.831027	0.63052	0.875908	0.868827	0.636457	0.705307	0.780622	0.748682	0.990665	1.04419	0.888502	1.11792	1.25364	1.35785	1.05151	0.932323	0.98591	0.851755	0.986264	0.830949	0.312535	0.0212881	0.00955596	0.0005
Glutamine dehydrated	C00064	1	0.198748	0.64846	0.776373	1.58304	0.632555	1.90541	0.752887	1.81606	2.17204	1.81192	2.47012	0.578415	0.677582	0.264711	0.535308	1.68277	1.46623	1.43703	1.63756	2.92172	2.33954	2.52877	2.54416	0.484506	0.328809	0.0417711	0.1081
Glycerol-alpha-phosphate	C03189	1	0.946629	0.859809	1.13631	1.30847	1.11331	1.76695	1.51355	1.18855	1.09026	1.19425	1.51897	1.66662	1.77538	1.54374	2.05038	2.69771	2.80943	2.57671	2.883	2.25499	2.44829	3.03461	2.56203	0.000739941	0.000147265	0.000432516	<0.0001
Glycine	C00037	1	0.557298	0.506768	0.821023	1.57552	1.49529	1.88742	0.976333	0.666083	0.529353	1.2333	0.746497	0.867668	0.496819	0.639415	0.994534	0.905249	0.990489	0.891786	1.06909	0.66249	0.412032	0.621915	1.29533	0.865964	0.0363202	0.85737	0.1433
Glycocyamine	C00581	1	0.746883	0.304031	0.55443	1.74482	0.845695	1.91776	1.07408	1.111	0.712236	3.04369	1.03293	1.49661	0.590287	1.03398	1.25151	2.48865	1.32571	2.17149	1.40103	1.62345	0.711088	1.33708	1.61764	0.118186	0.286848	0.798408	0.3248
Glycyl tyrosine		1	0.0822188	0.728525	0.611333	0.609266	0.519406	0.480389	0.170464	0.131055	0.309288	0.21621	0.0962801	0.881752	0.782881	0.387471	0.767868	0.932424	0.727381	0.724683	0.390961	0.440741	0.133915	0.238154	0.100227	0.668599	0.141615	0.672698	0.183
Guanosine	C00387	1	0.529311	2.18614	3.49568	0.463973	0.440927	0.313418	0.586175	0.530898	0.808138	0.351485	0.377617	1.3444	1.06819	0.715146	0.759639	0.608171	0.952603	1.77756	0.956666	0.851897	0.240985	0.217611	0.136055	0.267128	0.0501079	0.456817	0.6342
Heptadecanoic acid		1	0.844546	0.875717	1.11833	0.943502	1.2375	0.875124	1.59931	0.769811	0.967219	0.972105	0.748057	1.35763	0.939149	0.99896	0.425726	1.75774	2.11416	1.91263	1.55309	1.16665	1.20013	1.14598	1.12539	0.889426	0.0164695	0.00338675	0.0051
Hexadecane		1	0.857354	0.700709	1.40693	1.5934	1.47307	2.4467	1.00424	0.58815	1.181	1.02877	0.916456	1.57391	1.24501	0.819828	1.19904	0.910785	1.50384	1.86284	0.91517	0.895067	1.15819	0.816523	1.26052	0.351939	0.418171	0.549668	0.9848
Hexadecylglycerol	C13859	1	1.06795	0.727852	1.23074	2.22954	1.95537	1.94743	2.94123	1.31855	1.30221	1.38777	1.2789	1.08168	1.03284	1.02516	1.18175	2.2915	1.83859	2.08693	1.78598	1.45923	1.53022	1.25062	1.29134	0.530569	0.345288	0.421474	0.655
Hexitol	C00392	1	1.10027	0.395959	0.730467	0.362374	0.603473	0.42641	0.264087	0.301438	0.2588	0.842161	0.112046	0.661191	0.655239	1.00987	1.1885	1.41131	1.29395	0.482272	0.582073	1.06278	0.593504	0.37022	0.544505	0.738377	0.0784328	0.270713	0.0397
Hexose-6-phosphate	C02965	1	0.119193	0.518655	0.689754	0.863419	0.483612	1.59587	0.258893	0.713868	2.19993	1.23266	1.15925	0.592656	0.47209	0.353156	0.664434	1.34552	1.14997	1.47399	0.97001	1.51864	2.62667	1.94625	2.13379	0.764945	0.214754	0.109047	0.0543
Hydroxycarbamate		1	1.57659	2.05067	1.22106	1.08903	0.400242	0.50224	1.95709	1.25364	2.29059	1.35626	1.5585	1.46181	2.91523	1.58047	1.31256	4.38162	6.71948	3.45527	1.92674	3.97431	0.903383	4.91886	0.619626	0.445397	0.0258607	0.406183	0.0117
Hydroxylamine	C00192	1	2.06166	2.99514	2.1728	1.47955	0.875643	1.59324	3.24239	2.32881	3.20271	1.83724	1.8263	4.07787	4.00453	2.97347	1.95747	6.6681	8.72338	5.97651	2.15679	4.88918	2.01471	4.64807	1.12165	0.113723	0.0314685	0.416547	0.0043
Hypoxanthine	C00262	1	0.780799	0.734339	0.913315	0.812667	0.656398	0.962503	0.811958	0.55166	0.824001	0.75988	0.672768	0.912539	0.95555	0.736234	0.832742	1.1967	1.17017	1.14006	0.971593	0.899782	1.09838	1.00877	1.02397	0.978789	0.00858563	0.00533158	0.0002
Inosine	C00294	1	0.753962	0.821498	1.19575	0.515727	0.438431	0.564129	0.622758	0.415577	0.643631	0.560316	0.499842	0.876615	0.831904	0.64162	0.788236	0.7696	0.645334	0.765548	0.878776	0.853142	0.687981	0.910336	0.617192	0.205196	0.00977593	0.0300217	0.058
Inosine 5'-monophosphate	C00130	1	1.88258	1.27692	0.915914	0.949602	0.616341	1.25127	0.859817	2.10238	1.46649	1.13182	2.65223	1.89888	2.15059	1.87161	1.52076	1.75032	1.29647	0.957454	0.641615	1.7158	2.59498	1.01967	2.1274	0.0587757	0.406373	0.957758	0.171
Inositol-4-monophosphate	C03546	1	1.2331	1.33272	2.01012	1.98358	1.12961	1.52906	4.31243	1.84769	1.53705	1.42716	2.05122	0.748629	1.58406	1.57114	1.94338	3.77672	2.89523	2.88154	2.15604	1.8354	1.65232	1.26226	2.10779	0.845431	0.414756	0.995498	0.4041
Isobutene glycol		1	1.09259	0.862051	1.38603	2.00717	1.50125	1.80902	2.49322	0.847492	0.863754	1.62893	1.20144	1.26048	1.0939	1.34787	1.22604	1.95189	2.13065	2.56937	1.78112	1.49939	1.71367	1.64964	1.10098	0.276703	0.583146	0.17219	0.0953
Isocitric acid	C00451	1	0.797429	0.887454	1.1688	0.702291	0.589804	0.474254	0.633204	0.389833	0.574293	0.60238	0.62259	0.994825	0.827399	0.712405	1.14814	0.766193	0.839393	0.655589	0.537145	0.701665	0.606072	0.637114	0.549876	0.743256	0.267324	0.264452	0.4191
Isohexonic acid		1	1.20166	0.0824732	1.06495	1.24207	0.919857	1.56284	1.33392	2.67414	2.94605	3.09407	3.99652	1.38699	1.38739	1.16908	1.50635	1.67054	1.93229	1.63779	0.430926	3.30025	3.10388	2.65462	3.13946	0.0943886	0.686075	0.701065	0.3296
Isoleucine	C00407	1	0.675882	0.785189	0.996153	1.23536	1.08354	1.20192	1.12027	0.960041	1.05814	1.2395	0.983571	1.05301	0.823278	0.767712	0.990761	1.6102	1.69643	1.46398	1.39325	1.54082	1.4836	1.402	1.39323	0.687228	0.0026315	0.00158453	<0.0001
Isothreonic acid	C00639	1	1.76338	2.4966	1.4709	3.3142	3.40767	3.32412	3.63854	4.28368	3.93948	4.77012	4.58857	2.80193	2.87077	1.76294	2.90154	2.77816	5.32838	3.83796	3.43207	6.10754	5.09721	6.49893	0.591618	0.073758	0.467916	0.900813	0.3403
Itaconic acid	C00490	1	0.947203	1.04131	1.04154	1.73059	1.54452	1.46225	1.59105	1.3717	1.39603	1.78234	1.63037	1.9761	2.06099	1.44398	2.30415	2.51884	2.64423	2.28005	2.11229	2.22282	2.1523	2.25408	2.00456	0.00213757	0.000867147	0.00161097	<0.0001
Lactic acid	C01432	1	0.922845	0.74281	1.47217	2.75794	2.81728	2.83134	3.30262	3.24863	2.26874	4.05073	2.82939	1.92724	1.0299	1.5563	1.90321	3.39931	3.42388	3.25224	3.28001	3.6484	4.72231	2.47947	4.33692	0.0716151	0.0213544	0.302822	0.0246
Leucine	C00123	1	0.496845	0.727494	0.953444	1.09974	0.850217	0.982934	0.792277	0.570609	0.715816	0.716096	0.501008	1.0736	0.630805	0.708421	0.793387	1.12959	1.28654	1.26085	1.11721	0.900536	0.854744	0.80305	0.820649	0.963902	0.0169377	0.00927044	0.0139
Levoglucosan		1	3.00747	1.48547	4.31322	1.10021	5.35084	4.14129	4.15676	1.90245	1.2968	2.90495	2.68839	2.04712	1.02625	2.23159	3.28624	2.06555	2.3502	4.02359	4.98117	1.93972	5.36222	2.32056	4.87361	0.742983	0.780966	0.182802	0.6529
Lysine	C00047	1	0.450528	0.967825	1.24614	1.30997	0.74381	0.978001	1.65354	1.58443	1.72503	1.87395	1.62703	1.67509	0.784644	0.988909	1.30211	2.90101	2.85965	3.10687	2.0914	3.08155	2.72612	2.26128	2.11048	0.330047	0.00190371	0.0107272	<0.0001
Lyxitol	C00532	1	0.802312	0.912558	1.00331	1.1218	1.07799	1.14741	1.1987	0.102928	1.14699	1.49572	1.35364	1.09995	0.977282	0.692507	0.796352	1.57199	0.964337	1.45874	1.2306	1.07869	1.82101	1.07647	1.79729	0.723698	0.260068	0.31258	0.2027
Maleimide	C07272	1	0.743504	0.682916	1.47559	1.68977	1.43952	1.51855	1.57278	0.478987	0.793364	0.52726	0.582465	1.13987	0.745097	0.818383	0.862606	1.60551	2.02463	1.58266	1.54682	0.847611	0.887148	0.743354	0.710025	0.688888	0.318616	0.0472497	0.3239
Malic acid	C00711	1	0.964785	0.976816	1.22136	1.01239	0.470897	0.85624	1.0673	0.473635	0.473576	0.587224	0.51478	1.04389	0.906294	0.880739	1.16004	1.0638	1.33248	0.836569	0.854606	0.670011	0.604695	0.63091	0.555147	0.645452	0.374645	0.0289829	0.269
Mannitol	C00392	1	0.865587	0.978852	1.03781	0.944687	0.726725	0.145092	0.941157	0.627188	0.462958	0.251111	0.527658	0.994658	0.236389	0.979577	0.904712	1.06688	0.804802	1.07988	0.510873	0.896147	0.569181	1.13434	0.795271	0.341468	0.475131	0.0358983	0.2802
Mannose	C00159	1	0.340895	0.722769	1.06022	1.11101	0.470369	0.621409	0.823486	0.418046	0.584563	0.553247	0.326012	0.730519	0.309591	0.519967	0.812782	0.86498	1.08283	0.695958	0.590611	0.280055	0.444272	0.68482	0.558487	0.38216	0.776662	0.844936	0.6935
Methanolphosphate		1	1.93928	1.65655	2.02377	1.78152	0.597381	0.954781	1.95459	1.56132	0.933022	1.22545	1.52881	1.62846	1.19629	1.5975	1.31114	1.57639	1.72297	2.43246	1.33184	1.64805	1.92389	1.82821	1.81983	0.418797	0.312133	0.0206374	0.1714
Methionine	C00073	1	0.542697	0.742576	1.03328	1.06553	0.720091	0.946265	0.734501	0.459799	0.633122	0.585732	0.445336	1.00441	0.665687	0.663934	0.749502	1.09052	1.18393	1.20519	1.17611	0.798794	0.761765	0.659648	0.704892	0.69098	0.0147272	0.0113713	0.022
Methylmaleic acid	C02226	1	0.757137	0.892143	1.4503	2.15695	3.04656	3.16426	3.81673	1.37288	1.72484	1.47061	1.41075	1.25768	1.41561	1.32825	1.42921	4.4674	4.41726	2.17528	4.76555	2.29788	1.98871	1.65944	2.35971	0.0761684	0.234694	0.0176447	0.0222
Myo-inositol	C00137	1	1.14821	0.92923	1.11138	0.930655	0.782569	1.01864	1.0136	0.714894	0.796284	0.890508	0.890854	1.39412	1.42027	1.27783	1.71953	1.46566	1.60542	1.25442	1.30171	1.07812	1.01813	1.22448	1.08562	0.00895675	0.00289529	0.00378671	<0.0001
Myristic acid	C06424	1	0.934456	0.885144	1.22683	0.170085	1.11366	1.23308	1.6707	0.371787	0.431914	0.530375	0.777387	1.14579	0.872083	1.04656	0.83908	0.898471	2.35731	1.83992	1.4378	1.35306	0.757721	1.12515	1.17703	0.74472	0.232598	0.00958802	0.0304
N-acetylaspartic acid	C01042	1	1.07666	1.00923	1.00034	0.726068	0.761551	0.667516	0.809827	0.614728	0.670363	0.776966	0.547489	0.455337	1.1803	0.99006	1.00645	0.999179	1.04202	0.911894	0.822463	0.947564	0.770019	0.95907	0.884056	0.49949	0.0121606	0.0106371	0.0863
Nicotinamide	C00153	1	0.767527	0.854832	1.01723	1.37526	1.16454	1.46063	1.4203	1.42357	1.57304	1.96185	1.64403	1.08854	0.974582	0.882654	1.1906	0.992809	1.99231	1.5518	1.64818	2.17111	2.08683	2.22381	1.71901	0.21615	0.413468	0.0474873	0.0219
Oleic acid	C00712	1	0.975236	1.02402	1.27809	1.15171	0.495506	1.21018	1.46557	0.322691	0.514568	0.07358	0.528372	0.637749	1.09619	0.182784	1.43154	0.89486	0.37561	2.04418	1.64255	0.18352	0.281118	1.2597	0.135233	0.440126	0.723115	0.726881	0.9579
Ornithine	C00077	1	0.494276	0.721502	0.927426	2.02303	1.52572	2.51269	1.3816	2.74493	2.05699	4.70072	3.90911	1.27945	0.741835	0.641279	1.1974	1.97703	1.41837	2.69613	2.212	2.98649	7.10003	3.83739	9.2504	0.396589	0.581656	0.170798	0.0979
Oxoproline	C01879	1	1.90216	0.957336	1.43399	1.45393	1.45339	1.59691	2.00474	1.299	1.31444	1.41617	1.5646	1.14612	1.04338	1.0604	1.3119	1.7778	1.93258	1.75915	1.95814	1.7976	1.97676	1.83231	1.82102	0.455464	0.152208	0.000780985	0.0865
Palmitic acid	C00249	1	0.926418	0.826658	1.06606	1.61591	1.52398	1.15075	1.67092	0.866618	1.03217	1.15108	0.972302	1.30605	1.07177	1.00803	1.36842	1.79733	2.52044	1.79581	1.33616	1.42487	1.17622	1.07337	1.16787	0.0611418	0.219391	0.0760347	0.016
Palmitoleic acid	C08362	1	0.455198	0.607261	0.809886	1.81771	1.07082	0.940876	0.942781	0.651077	0.883753	0.512164	0.579012	1.41192	0.419973	0.692301	1.17788	1.5407	1.35324	1.34049	0.920783	0.505729	1.79743	0.833196	1.63833	0.446814	0.71255	0.146281	0.0968
Pantothenic acid	C12276	1	3.64341	3.70925	1.63292	6.29385	5.32646	4.19843	7.67766	3.85998	3.91884	4.09491	4.70159	5.03835	2.45233	2.82426	3.47618	3.27384	8.2583	7.40536	3.24333	4.64044	4.59681	4.13735	3.65264	0.330287	0.836126	0.720261	0.6865
Pelargonic acid	C01601	1	0.0617529	1.2581	1.10621	2.24741	2.00307	1.95774	2.30175	0.997019	1.47358	2.25101	1.27146	0.538566	0.965239	1.12926	1.67744	3.09058	3.14123	2.36186	1.71926	2.09049	1.7907	1.90645	1.07143	0.559955	0.242829	0.558603	0.1624
Pentadecanoic acid	C16537	1	1.27603	0.92817	1.37841	2.01771	1.61728	1.02248	1.71404	0.269939	0.689379	1.0529	0.827016	1.47931	0.972526	1.0836	1.11633	2.05568	2.33157	1.93262	1.62564	1.28206	0.524703	1.25365	1.50516	0.914266	0.173223	0.16016	0.0502
Phenylalanine	C00079	1	0.661181	0.806173	1.09913	0.981824	0.783603	0.993171	0.71602	0.560898	0.863998	0.616688	0.540442	0.972131	0.852233	0.724353	0.887467	1.22718	1.2912	1.27519	1.06959	1.00503	0.861311	0.854468	0.810862	0.778424	0.00697357	0.0324197	0.0035
Phosphate	C00009	1	0.993576	1.04073	1.19681	1.42624	1.74332	1.46424	1.85535	0.884704	0.974693	1.14535	0.890757	1.46007	1.14736	1.46848	1.47913	2.02429	2.59039	1.96333	1.47265	1.60062	1.43599	1.4029	1.14236	0.0122353	0.171913	0.00957084	0.001
Phosphoethanolamine	C00346	1	0.112319	2.51683	0.203275	0.364053	0.0837813	0.177612	0.04924	0.734231	2.57955	1.44305	0.767834	1.08981	3.62899	0.295332	1.88368	2.60529	2.01023	0.862579	0.166714	3.36337	1.11826	4.70151	1.26944	0.429274	0.0663973	0.249362	0.0366
Proline	C00148	1	0.853543	0.570897	0.78612	1.81051	1.69278	0.78634	1.91335	0.822223	0.904079	1.13221	0.878751	1.13578	1.13618	0.961513	0.457959	2.1714	2.64542	1.8429	1.53075	1.49793	1.428	1.27989	0.464551	0.536633	0.207552	0.38365	0.0859
Propane-1,3-diol	C02457	1	0.841936	1.02183	1.32552	2.01119	1.4371	1.14139	2.1377	1.24136	1.21806	1.91513	1.0916	2.61013	1.2362	1.68053	1.96875	2.00565	2.57592	2.46794	1.86354	1.53204	1.60795	1.20882	1.42278	0.0351711	0.111321	0.722427	0.0064
Putrescine	C00138	1	0.770248	1.04387	0.400871	0.738862	0.617971	0.57754	0.949797	2.02995	2.45105	3.33268	2.67823	1.53807	2.41048	2.05948	1.61551	2.54645	3.10248	2.50263	1.42013	7.19533	4.33067	6.45477	3.72365	0.00463346	0.00360302	0.0184639	<0.0001
Pyridoxine	C00314	1	0.540409	0.62465	1.11062	0.701779	0.708031	0.632287	0.849155	0.420524	0.723533	0.47144	0.412399	0.658208	0.485128	0.435978	0.799385	0.85721	1.03317	0.890962	0.734338	0.832244	0.510272	0.709478	0.609723	0.216458	0.0872026	0.166418	0.6659
Pyrophosphate	C00013	1	1.41245	1.61693	1.58612	0.983454	0.331796	1.00087	1.67953	1.43987	1.48573	1.69576	1.79512	1.60367	1.96347	1.77553	1.33736	2.00074	1.73181	1.52396	0.771307	2.36654	1.52642	2.39441	1.45423	0.220307	0.231066	0.267361	0.0426
Pyruvic acid	C00022	1	2.95461	1.10729	4.66042	1.95067	3.47339	0.358949	4.9664	2.05135	1.88205	1.76269	2.44159	0.0130312	2.80088	0.858544	2.79965	3.11278	4.66511	2.89021	2.71495	1.8245	2.50755	1.50502	1.2739	0.494631	0.566866	0.434207	0.7989
Ribitol	C00474	1	0.861317	0.987544	1.22521	1.56645	1.37346	1.48387	1.54882	2.36794	2.22879	2.70792	2.51163	1.33981	1.06147	1.00488	1.33951	1.66826	2.14749	1.34573	1.48851	3.72986	3.93785	4.00563	1.83986	0.201283	0.383089	0.129549	0.0395
Ribose	C00121	1	0.478867	0.708103	0.91039	0.758301	0.614294	0.782942	0.726308	0.572736	0.866047	0.850524	0.646722	0.611867	0.581015	0.540611	0.632363	0.811676	0.948492	0.874179	0.858604	0.145304	0.648723	0.925804	0.615873	0.170875	0.0171882	0.430845	0.4198
Ribose-5-phosphate	C00117	1	0.26831	0.582156	0.770177	1.38377	0.346721	1.33938	0.695051	1.95988	2.14168	2.28137	1.47545	0.832135	1.10002	0.6245	0.871387	1.84626	2.02986	1.57992	1.35291	2.5055	2.85068	0.52645	2.35053	0.311848	0.0410373	0.870345	0.1213
Saccharic acid	C00818	1	1.20166	1.11227	1.06495	1.24207	0.919857	1.56284	1.33392	2.10553	2.94605	3.36562	3.63845	1.38699	0.937495	1.16908	1.50635	1.67054	1.93229	0.938391	1.68885	3.30025	3.0589	3.92077	3.45194	0.285313	0.290721	0.313221	0.085
Serine	C00065	1	0.594554	0.646828	0.893663	0.89978	0.710382	1.03574	0.839921	0.490643	0.693886	0.637508	0.546063	0.865087	0.599553	0.628611	0.660893	1.01787	1.16464	0.966187	0.974544	0.732515	0.709583	0.723941	0.666594	0.436759	0.0990825	0.0511593	0.2403
Sorbitol	C00794	1	1.03188	0.732711	1.48498	2.62351	1.92857	2.00605	2.46695	1.43181	0.321991	1.47494	1.39048	1.81602	1.5495	0.693277	1.56028	3.58495	3.75225	2.73656	2.19478	1.90004	1.66123	1.92192	1.99415	0.283162	0.0914216	0.0473864	0.0044
Stearic acid	C01530	1	0.8852	0.809529	1.07426	1.70445	1.65054	1.28181	1.60328	0.82445	0.951042	1.21368	0.92651	1.19591	0.966617	0.879733	1.3766	1.65039	2.36781	1.7492	1.28036	1.40971	1.16818	0.947175	1.15682	0.248052	0.441257	0.178558	0.0833
Succinic acid	C00042	1	0.97251	1.09299	1.15429	1.95439	1.80623	1.78445	2.28225	1.53321	1.50039	1.9146	1.78992	1.8039	1.74104	1.63541	2.03805	3.54978	3.55136	3.09155	2.98348	2.59694	2.00212	2.70878	2.4269	0.000219516	0.000396359	0.00668387	<0.0001
Taurine	C00245	1	1.46122	1.49987	1.36545	0.487193	0.324235	0.710612	0.523864	0.867747	0.633329	0.726327	1.16252	1.06507	1.18244	0.928186	1.3063	0.78206	0.71388	1.10049	1.21044	1.20745	1.12239	1.28988	1.05666	0.181807	0.022488	0.043566	0.0322
Threonine	C00188	1	0.664675	0.832214	1.06183	1.23097	0.974832	1.18565	1.10485	0.872334	1.00948	1.12215	0.951039	1.11496	0.784426	0.845551	0.925915	1.59395	1.70153	1.40207	1.39633	1.429	1.26543	1.21956	1.24531	0.814964	0.00531628	0.00535197	0.0003
Thymidine	C00214	1	1.17051	0.655842	1.98603	0.845233	1.19218	1.29777	0.99847	1.68651	1.20319	1.15749	1.73704	1.3786	0.493012	1.15496	1.25669	0.651959	0.760193	1.57183	1.66155	1.47719	1.45802	1.74771	1.24898	0.714316	0.792147	0.848335	0.9717
Tryptophan	C00078	1	0.386534	0.612007	0.985678	0.81715	0.658291	0.784313	0.759545	0.469565	0.773382	0.480346	0.516626	0.770913	0.45323	0.553311	0.702105	1.10023	1.16737	1.21762	0.612474	1.00156	0.762586	0.758058	0.650739	0.47618	0.109458	0.0645392	0.1378
Tyrosine	C00082	1	0.605894	0.73616	0.999068	0.880227	0.709378	0.882386	0.761364	0.51887	0.7504	0.607425	0.508638	0.910527	0.783927	0.661362	0.791084	1.14324	1.17315	1.15271	0.981723	0.909407	0.886275	0.793676	0.808534	0.676714	0.00266663	0.00686012	0.0021
UDP-glucuronic acid	C00167	1	0.614649	0.852405	1.03659	1.81387	1.17401	1.55664	2.01261	2.28898	2.00337	2.02368	3.13331	1.17297	0.70856	0.927419	1.13735	2.40039	2.46512	1.7616	1.81082	2.12901	2.37403	2.10597	1.73113	0.470896	0.121142	0.385651	0.4792
UDP-N-acetylglucosamine	C00043	1	0.986926	0.968699	0.906277	0.532219	0.833643	0.918783	0.760734	1.32415	1.48247	1.47701	1.74494	1.12118	1.39329	1.07693	0.986648	1.09351	1.57931	1.34972	0.826325	1.61396	1.38294	1.80467	1.56219	0.0936624	0.0483227	0.521436	0.0076
Uracil	C00106	1	3.32007	0.778865	1.13641	1.05073	0.776944	1.94131	1.79685	1.68363	2.67887	2.08406	2.25203	0.662018	1.20091	1.57819	0.322902	1.76822	1.1484	2.06771	2.38726	2.18084	2.65736	2.88294	2.69259	0.381368	0.287421	0.142973	0.7471
Urea	C00086	1	0.703097	0.956482	1.11955	1.31264	0.981169	1.01922	1.44322	0.89135	0.946972	1.1615	0.921683	1.49949	1.15218	1.14946	1.65376	2.02179	2.49611	1.86229	1.44664	1.62027	1.4592	1.36801	1.44132	0.0347907	0.0200126	0.000920141	<0.0001
Uric acid	C00366	1	1.40483	2.16875	3.32738	1.49081	1.16595	0.765988	1.58863	1.46227	1.22151	1.52089	1.39546	3.61964	2.08216	2.62743	1.69801	3.45947	0.794868	3.08596	2.48822	2.55303	2.26672	2.48741	1.65349	0.451412	0.0990955	0.00790089	0.0126
Uridine	C00299	1	0.214759	0.677811	0.679997	0.406838	0.147193	0.250707	0.113752	0.380706	0.741209	0.556387	0.465541	0.486128	0.420054	0.326711	0.453794	0.221231	0.269143	0.440698	0.334838	0.463676	0.301575	0.776486	0.299596	0.228654	0.325995	0.59879	0.3707
Valine	C00183	1	0.606497	0.772004	0.958836	1.10267	0.892145	1.07365	0.944294	0.68754	0.776403	0.9132	0.681185	1.07988	0.740265	0.785429	0.86918	1.41326	1.52834	1.29892	1.21229	1.12507	1.06997	0.957423	0.994942	0.780544	0.00556253	0.00612239	0.0006
Xanthine	C00385	1	0.837078	0.915961	1.26594	0.854746	0.331968	0.449997	0.593534	0.414497	0.668777	0.657853	0.404022	0.643177	0.709882	0.812585	0.851357	0.988511	0.961494	1.07685	0.836544	0.849697	0.582941	0.689599	0.515555	0.0537315	0.0160343	0.278625	0.1602
Xylonolactone	C02266	1	0.897161	0.913883	0.74502	0.684917	0.530502	0.592038	0.296961	0.530527	0.746283	0.686039	0.648893	0.704483	1.15677	0.673939	0.982315	0.738693	0.722807	0.76279	0.524064	0.699992	0.800512	0.867591	0.81671	0.942043	0.156128	0.0469147	0.1026
Zymosterol	C05437	1	0.90726	0.85996	1.17685	1.15308	1.08012	0.929302	1.34549	0.51246	0.539338	0.630816	0.545827	1.04161	1.09778	0.904592	1.27356	1.477	1.52455	1.26766	1.11106	0.81215	0.989359	0.78229	0.83228	0.40208	0.142209	0.00136238	0.0026
