# Supplementary material for: Bmal1 integrates mitochondrial metabolism and macrophage activation
Source: eLife journal article supplement (doi:10.7554/elife.54090), 2020-05-12
Supplement: supp [file elife-54090-supp-v1.zip › elife_poa_e54090_Figure_5_figure_supplement_1.pdf]

**A**Genes induced or repressed by 8 h M1 activation ( $|F.C.| > 1.5$ ,  $p < 0.05$ ,  $FDR < 0.05$ )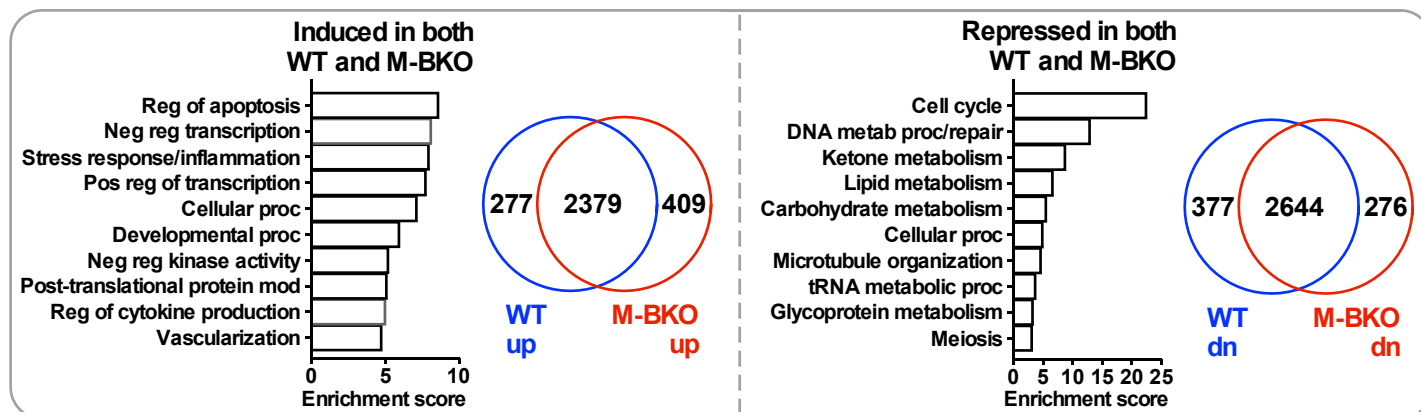**B**Differentially expressed genes in M1-activated macrophages ( $p < 0.05$ ,  $FDR < 0.05$ )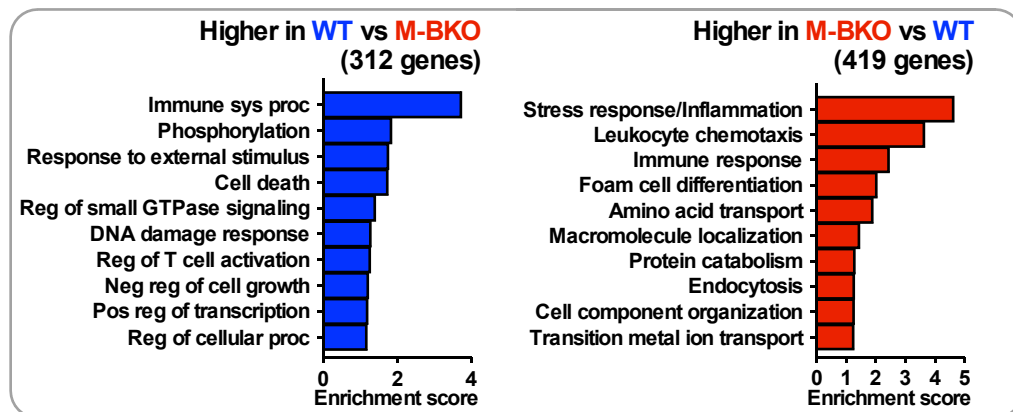**C**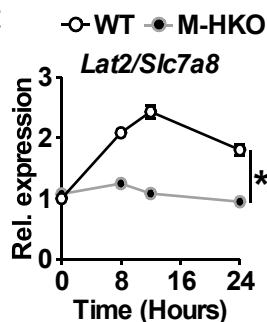**D**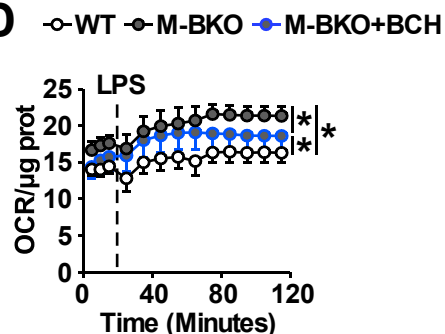

Fig. 5 Supplemental figure 1
