# Supplementary material for: Bmal1 integrates mitochondrial metabolism and macrophage activation
Source: eLife journal article supplement (doi:10.7554/elife.54090), 2020-05-12
Supplement: supp [file elife-54090-supp-v1.zip › elife_poa_e54090_Figure_5_source_data_1.xlsx]

## Sheet: Sheet1
Figure 5 source data 1. Functional annotation clustering genes commonly and differentially regulated between WT and M-BKO BMDMs by 8 h M1 activation.
Enrichment by Biological Process determined by DAVID
Mutually induced by M1 activation (2379 genes, p<0.05, FDR<0.05, F.C.>1.5)
Annotation Cluster 1	Enrichment Score: 8.613845177916573
Category	Term	Count	%	PValue	Genes	List Total	Pop Hits	Pop Total	Fold Enrichment
GOTERM_BP_ALL	GO:0042981~regulation of apoptosis	126	5.66038	2.86305e-13	STAT5A, IL19, TNFSF15, PMAIP1, ITSN1, PNP, IL10, PGP, CUL7, FAS, PIK3CG, BCL10, BCL2L14, PIM1, MECP2, POLB, PIM2, BCL2L11, STK3, DDIT3, TRIM35, HIF1A, VEGFA, MNT, RIPK2, MAPK8, DCUN1D3, TRAF1, TRAF2, IFIH1, CDK5R1, GCLC, NFKBID, ADORA2A, STK17B, HSPA1A, BCL2L2, BCL2L1, HSPA1B, GCLM, CD74, SRC, TIMP1, HSPA1L, IRAK3, AKT1S1, TRP53BP2, FCER1G, DYRK2, SKIL, TRAF6, RUNX3, TRAF4, TRAF3, PLAGL2, CFLAR, …	1686	553	14219	1.92157
GOTERM_BP_ALL	GO:0043067~regulation of programmed cell death	126	5.66038	7.34545e-13	STAT5A, IL19, TNFSF15, PMAIP1, ITSN1, PNP, IL10, PGP, CUL7, FAS, PIK3CG, BCL10, BCL2L14, PIM1, MECP2, POLB, PIM2, BCL2L11, STK3, DDIT3, TRIM35, HIF1A, VEGFA, MNT, RIPK2, MAPK8, DCUN1D3, TRAF1, TRAF2, IFIH1, CDK5R1, GCLC, NFKBID, ADORA2A, STK17B, HSPA1A, BCL2L2, BCL2L1, HSPA1B, GCLM, CD74, SRC, TIMP1, HSPA1L, IRAK3, AKT1S1, TRP53BP2, FCER1G, DYRK2, SKIL, TRAF6, RUNX3, TRAF4, TRAF3, PLAGL2, CFLAR, …	1686	560	14219	1.89755
GOTERM_BP_ALL	GO:0006915~apoptosis	110	4.9416	8.92371e-13	IL19, TNFSF15, PMAIP1, SHF, DNASE1L3, UNC5B, CUL7, FAS, BCL7C, BCL10, BCL2L14, NCF1, PIM2, BCL2L11, STK3, AHR, WDR92, DDIT4, TRIM35, RIPK2, MAPK7, TNFAIP3, BLCAP, TRAF1, TRAF2, LITAF, GGCT, STK17B, BCL2L2, RFFL, BCL2L1, IRAK3, ECE1, TRP53BP2, TRIM69, DYRK2, TRAF6, TRAF4, SRGN, TRAF3, CFLAR, TM2D1, KLF11, RYBP, MUL1, MALT1, NTN1, TAX1BP1, NFKBIL1, BFAR, VCP, BCL2A1A, BBC3, CSRNP2, CSRNP1, HTATIP2,…	1686	465	14219	1.99504
GOTERM_BP_ALL	GO:0008219~cell death	117	5.25606	9.22897e-13	IL19, TNFSF15, PMAIP1, SHF, DNASE1L3, CUL7, UNC5B, FAS, BCL7C, BCL10, BCL2L14, NCF1, POLB, PIM2, AHR, BCL2L11, STK3, WDR92, DDIT4, TRIM35, RIPK2, MAPK7, TNFAIP3, BLCAP, TRAF1, TRAF2, GGCT, LITAF, STK17B, BCL2L2, RFFL, BCL2L1, IRAK3, ECE1, TRP53BP2, TRIM69, FGL2, DYRK2, TRAF6, TRAF4, SRGN, TRAF3, CFLAR, TM2D1, HC, KLF11, RYBP, MUL1, MALT1, NTN1, TAX1BP1, NFKBIL1, BFAR, VCP, CSRNP2, BCL2A1A, BBC3, …	1686	507	14219	1.94621
GOTERM_BP_ALL	GO:0010941~regulation of cell death	126	5.66038	1.09296e-12	STAT5A, IL19, TNFSF15, PMAIP1, ITSN1, PNP, IL10, PGP, CUL7, FAS, PIK3CG, BCL10, BCL2L14, PIM1, MECP2, POLB, PIM2, BCL2L11, STK3, DDIT3, TRIM35, HIF1A, VEGFA, MNT, RIPK2, MAPK8, DCUN1D3, TRAF1, TRAF2, IFIH1, CDK5R1, GCLC, NFKBID, ADORA2A, STK17B, HSPA1A, BCL2L2, BCL2L1, HSPA1B, GCLM, CD74, SRC, TIMP1, HSPA1L, IRAK3, AKT1S1, TRP53BP2, FCER1G, DYRK2, SKIL, TRAF6, RUNX3, TRAF4, TRAF3, PLAGL2, CFLAR, …	1686	563	14219	1.88744
GOTERM_BP_ALL	GO:0016265~death	118	5.30099	2.07288e-12	IL19, TNFSF15, PMAIP1, SHF, DNASE1L3, CUL7, UNC5B, FAS, BCL7C, BCL10, BCL2L14, NCF1, POLB, PIM2, AHR, BCL2L11, STK3, WDR92, DDIT4, TRIM35, RIPK2, MAPK7, TNFAIP3, BLCAP, TRAF1, TRAF2, GGCT, LITAF, STK17B, BCL2L2, RFFL, BCL2L1, IRAK3, ECE1, TRP53BP2, TRIM69, FGL2, DYRK2, TRAF6, TRAF4, SRGN, TRAF3, CFLAR, TM2D1, HC, KLF11, NR4A2, RYBP, MUL1, MALT1, NTN1, TAX1BP1, NFKBIL1, BFAR, VCP, CSRNP2, BCL2A1A,…	1686	519	14219	1.91746
GOTERM_BP_ALL	GO:0012501~programmed cell death	110	4.9416	2.84179e-12	IL19, TNFSF15, PMAIP1, SHF, DNASE1L3, UNC5B, CUL7, FAS, BCL7C, BCL10, BCL2L14, NCF1, PIM2, BCL2L11, STK3, AHR, WDR92, DDIT4, TRIM35, RIPK2, MAPK7, TNFAIP3, BLCAP, TRAF1, TRAF2, LITAF, GGCT, STK17B, BCL2L2, RFFL, BCL2L1, IRAK3, ECE1, TRP53BP2, TRIM69, DYRK2, TRAF6, TRAF4, SRGN, TRAF3, CFLAR, TM2D1, KLF11, RYBP, MUL1, MALT1, NTN1, TAX1BP1, NFKBIL1, BFAR, VCP, BCL2A1A, BBC3, CSRNP2, CSRNP1, HTATIP2,…	1686	473	14219	1.9613
GOTERM_BP_ALL	GO:0043068~positive regulation of programmed cell death	64	2.87511	3.19888e-09	HTATIP2, IL19, BNIP3, PMAIP1, PTEN, PRDX1, IL10, NOD1, CASP4, CASP7, HMOX1, TICAM1, FAS, LTB, LTA, BCL10, GZMB, DAPK3, STK3, BCL2L11, DDIT3, JMY, TRIM35, CAPN10, LCK, ERN1, NAIF1, RIPK2, MAPK8, DCUN1D3, CDK5R1, TNF, NFKBID, ADORA2A, STK17B, BCL2L1, SRC, GCH1, UTP11L, ERCC6, SH3GLB1, TRP53BP2, BCL3, DYRK2, TRAF6, RUNX3, PLAGL2, COL4A3, CEBPB, IL2RA, TM2D1, NF1, MUL1, NR4A1, IDO1, NIACR1, NFKBIL1, …	1686	250	14219	2.15899
GOTERM_BP_ALL	GO:0010942~positive regulation of cell death	64	2.87511	4.47797e-09	HTATIP2, IL19, BNIP3, PMAIP1, PTEN, PRDX1, IL10, NOD1, CASP4, CASP7, HMOX1, TICAM1, FAS, LTB, LTA, BCL10, GZMB, DAPK3, STK3, BCL2L11, DDIT3, JMY, TRIM35, CAPN10, LCK, ERN1, NAIF1, RIPK2, MAPK8, DCUN1D3, CDK5R1, TNF, NFKBID, ADORA2A, STK17B, BCL2L1, SRC, GCH1, UTP11L, ERCC6, SH3GLB1, TRP53BP2, BCL3, DYRK2, TRAF6, RUNX3, PLAGL2, COL4A3, CEBPB, IL2RA, TM2D1, NF1, MUL1, NR4A1, IDO1, NIACR1, NFKBIL1, …	1686	252	14219	2.14186
GOTERM_BP_ALL	GO:0043065~positive regulation of apoptosis	62	2.78527	1.51645e-08	IL19, BNIP3, PMAIP1, PRDX1, PTEN, IL10, NOD1, CASP4, CASP7, HMOX1, TICAM1, FAS, LTB, LTA, BCL10, GZMB, DAPK3, STK3, BCL2L11, DDIT3, JMY, TRIM35, CAPN10, LCK, ERN1, NAIF1, RIPK2, MAPK8, DCUN1D3, CDK5R1, TNF, NFKBID, ADORA2A, STK17B, BCL2L1, SRC, GCH1, UTP11L, ERCC6, SH3GLB1, TRP53BP2, BCL3, DYRK2, TRAF6, RUNX3, PLAGL2, COL4A3, CEBPB, IL2RA, TM2D1, NF1, MUL1, NR4A1, IDO1, NIACR1, NFKBIL1, NOTCH1, U…	1686	248	14219	2.10839
GOTERM_BP_ALL	GO:0006917~induction of apoptosis	46	2.06649	6.83e-08	TNF, ADORA2A, IL19, STK17B, BNIP3, PMAIP1, PTEN, PRDX1, GCH1, UTP11L, NOD1, CASP4, ERCC6, TRP53BP2, SH3GLB1, CASP7, HMOX1, TICAM1, BCL3, FAS, DYRK2, TRAF6, LTB, LTA, RUNX3, PLAGL2, COL4A3, BCL10, CEBPB, TM2D1, NR4A1, MUL1, GZMB, DAPK3, NFKBIL1, JMY, TRIM35, UACA, NUPR1, BBC3, BNIP3L, LCK, ERN1, NAIF1, MAPK8, APAF1	1686	167	14219	2.32302
GOTERM_BP_ALL	GO:0012502~induction of programmed cell death	46	2.06649	6.83e-08	TNF, ADORA2A, IL19, STK17B, BNIP3, PMAIP1, PTEN, PRDX1, GCH1, UTP11L, NOD1, CASP4, ERCC6, TRP53BP2, SH3GLB1, CASP7, HMOX1, TICAM1, BCL3, FAS, DYRK2, TRAF6, LTB, LTA, RUNX3, PLAGL2, COL4A3, BCL10, CEBPB, TM2D1, NR4A1, MUL1, GZMB, DAPK3, NFKBIL1, JMY, TRIM35, UACA, NUPR1, BBC3, BNIP3L, LCK, ERN1, NAIF1, MAPK8, APAF1	1686	167	14219	2.32302
GOTERM_BP_ALL	GO:0043066~negative regulation of apoptosis	51	2.29111	3.91144e-05	STAT5A, MITF, BNIP3, ITSN1, PNP, PTEN, CASP4, BAG3, CHST11, FAS, PIK3CG, BCL10, PGAP2, MECP2, PIM1, POLB, PIM2, BTG2, VEGFA, AVEN, MAPK8, CLN8, TRAF2, GCLC, ADORA2A, HSPA1A, HSPA1B, BCL2L1, GCLM, CD74, TIMP1, HSPA1L, AKT1S1, PPP2CB, BCL3, FCER1G, BCL6, CFLAR, CEBPB, SPHK2, SPHK1, NR4A2, BIRC6, IDO1, TAX1BP1, SOD2, BFAR, CDKN1A, NOTCH1, CDKN1B, BCL2A1A, BNIP3L, APBB3	1686	239	14219	1.79963
GOTERM_BP_ALL	GO:0043069~negative regulation of programmed cell death	51	2.29111	6.84438e-05	STAT5A, MITF, BNIP3, ITSN1, PNP, PTEN, CASP4, BAG3, CHST11, FAS, PIK3CG, BCL10, PGAP2, MECP2, PIM1, POLB, PIM2, BTG2, VEGFA, AVEN, MAPK8, CLN8, TRAF2, GCLC, ADORA2A, HSPA1A, HSPA1B, BCL2L1, GCLM, CD74, TIMP1, HSPA1L, AKT1S1, PPP2CB, BCL3, FCER1G, BCL6, CFLAR, CEBPB, SPHK2, SPHK1, NR4A2, BIRC6, IDO1, TAX1BP1, SOD2, BFAR, CDKN1A, NOTCH1, CDKN1B, BCL2A1A, BNIP3L, APBB3	1686	244	14219	1.76275
GOTERM_BP_ALL	GO:0060548~negative regulation of cell death	51	2.29111	7.63066e-05	STAT5A, MITF, BNIP3, ITSN1, PNP, PTEN, CASP4, BAG3, CHST11, FAS, PIK3CG, BCL10, PGAP2, MECP2, PIM1, POLB, PIM2, BTG2, VEGFA, AVEN, MAPK8, CLN8, TRAF2, GCLC, ADORA2A, HSPA1A, HSPA1B, BCL2L1, GCLM, CD74, TIMP1, HSPA1L, AKT1S1, PPP2CB, BCL3, FCER1G, BCL6, CFLAR, CEBPB, SPHK2, SPHK1, NR4A2, BIRC6, IDO1, TAX1BP1, SOD2, BFAR, CDKN1A, NOTCH1, CDKN1B, BCL2A1A, BNIP3L, APBB3	1686	245	14219	1.75556
GOTERM_BP_ALL	GO:0006916~anti-apoptosis	20	0.898473	0.00653403	CFLAR, TRAF2, PGAP2, CEBPB, GCLC, SPHK2, STAT5A, BNIP3, BIRC6, HSPA1A, POLB, HSPA1B, BCL2L1, PIM2, TAX1BP1, HSPA1L, BFAR, AKT1S1, BAG3, BNIP3L, VEGFA, AVEN	1686	88	14219	1.91672
Annotation Cluster 2	Enrichment Score: 8.126403635605508
Category	Term	Count	%	PValue	Genes	List Total	Pop Hits	Pop Total	Fold Enrichment
GOTERM_BP_ALL	GO:0048519~negative regulation of biological process	273	12.2642	6.72096e-22	EIF2C1, PTGS2, STAT5A, FST, FGFRL1, EDN1, REST, ITSN1, MXI1, ZGPAT, SIN3B, S1PR1, HTRA1, INSIG1, GDF9, FAS, PIK3CG, RCOR2, NCF1, MECP2, PIM1, ZHX2, SERPING1, POLB, PIM2, VASH1, PDCD1LG2, HES1, PIAS4, JUN, VEGFA, RYR1, TGIF1, MAPK8, ADAMTS1, ST18, EIF2C3, DCBLD2, IQCB1, ZFP358, PPP2R3A, NFKBID, NFKBIA, TXN1, HSPA1A, BCL2L1, HSPA1B, CD74, LIF, HSPA1L, MOV10, ATN1, PROCR, HEXIM1, KLKB1, FCER1G, TCF4…	1686	1326	14219	1.73632
GOTERM_BP_ALL	GO:0048523~negative regulation of cellular process	244	10.9614	3.38291e-19	EIF2C1, PTGS2, STAT5A, FST, FGFRL1, EDN1, REST, ITSN1, MXI1, ZGPAT, SIN3B, S1PR1, HTRA1, INSIG1, GDF9, FAS, PIK3CG, RCOR2, PIM1, ZHX2, MECP2, POLB, SERPING1, PIM2, VASH1, PDCD1LG2, HES1, PIAS4, JUN, VEGFA, TGIF1, MAPK8, ST18, EIF2C3, DCBLD2, IQCB1, ZFP358, PPP2R3A, NFKBID, NFKBIA, TXN1, HSPA1A, BCL2L1, HSPA1B, CD74, LIF, HSPA1L, ATN1, HEXIM1, FCER1G, TCF4, NR1H3, DNMT3A, SPHK2, SPHK1, KLF11, CREB…	1686	1192	14219	1.72633
GOTERM_BP_ALL	GO:0006357~regulation of transcription from RNA polymerase II promoter	120	5.39084	3.04734e-08	JDP2, STAT5A, ARNT2, CBX4, CASK, RORA, HMGN5, MXI1, GATA2, S1PR1, MED26, TDGF1, MLL1, SATB1, RXRA, ZHX2, MED13, AHR, HES1, HIF1A, MED15, PIAS4, JUN, VEGFA, SIX1, MNDA, TGIF1, ST18, CAMTA2, SOX5, ELK1, TXN1, SRF, LIF, NR1H2, PLAGL1, ATN1, HEXIM1, SKIL, AGRN, TCF4, RUNX2, PLAGL2, DNMT3A, ESRRA, EPAS1, MAML1, CREBBP, RYBP, NR4A2, KLF16, NR4A1, SMAD3, NR4A3, EHMT2, MED13L, FOXP4, FOXP1, ATF4, NOTCH1,…	1686	616	14219	1.6429
GOTERM_BP_ALL	GO:0031327~negative regulation of cellular biosynthetic process	91	4.08805	3.64462e-08	PPARD, JDP2, EIF2C1, CCDC85B, EDN1, CBX4, NFKB1, PAX4, REST, ZEB1, MXI1, DAXX, CDT1, CBX5, ZGPAT, SAP30, EIF4EBP1, SIN3B, INSIG1, ATF6B, HSF4, BHLHE41, NRG1, LAG3, SATB1, RCOR2, ZHX2, MECP2, IRF2BP2, SPEN, IRF2BP1, MBD2, GZF1, HES1, PIAS4, NAB2, MAP3K10, TGIF1, ST18, ZFPM1, LCOR, EIF2C3, KDM6B, GLIS3, CAV1, MTDH, GCLC, TNF, HAT1, TXN1, ATN1, HEXIM1, LANCL2, ZKSCAN17, RNF128, HINFP, PER1, BCL3, BC…	1686	430	14219	1.78478
GOTERM_BP_ALL	GO:0009890~negative regulation of biosynthetic process	91	4.08805	5.71732e-08	PPARD, JDP2, EIF2C1, CCDC85B, EDN1, CBX4, NFKB1, PAX4, REST, ZEB1, MXI1, DAXX, CDT1, CBX5, ZGPAT, SAP30, EIF4EBP1, SIN3B, INSIG1, ATF6B, HSF4, BHLHE41, NRG1, LAG3, SATB1, RCOR2, ZHX2, MECP2, IRF2BP2, SPEN, IRF2BP1, MBD2, GZF1, HES1, PIAS4, NAB2, MAP3K10, TGIF1, ST18, ZFPM1, LCOR, EIF2C3, KDM6B, GLIS3, CAV1, MTDH, GCLC, TNF, HAT1, TXN1, ATN1, HEXIM1, LANCL2, ZKSCAN17, RNF128, HINFP, PER1, BCL3, BC…	1686	434	14219	1.76833
GOTERM_BP_ALL	GO:0009892~negative regulation of metabolic process	106	4.7619	8.09842e-08	JDP2, EIF2C1, CCDC85B, IMPACT, EDN1, CBX4, REST, MXI1, CBX5, ZGPAT, SIN3B, EIF4EBP1, INSIG1, ATF6B, IL1B, SATB1, RCOR2, RELA, SOCS1, ZHX2, MECP2, SERPING1, HES1, PIAS4, JUN, TGIF1, ST18, EIF2C3, CAV1, GCLC, TXN1, GIPC1, IRAK3, MOV10, ATN1, HEXIM1, SKIL, BHLHE40, TCF4, NR1H3, DNMT3A, KLF11, RYBP, SMAD3, SMYD1, EHMT2, FOXP4, FOXP1, HDAC1, RNF2, HOPX, FABP4, MTOR, RBPJ, DNAJB6, NCOR2, ADAR, PPARD, B…	1686	534	14219	1.67408
GOTERM_BP_ALL	GO:0010558~negative regulation of macromolecule biosynthetic process	87	3.90836	1.63155e-07	PPARD, JDP2, EIF2C1, CCDC85B, CBX4, NFKB1, PAX4, REST, ZEB1, MXI1, DAXX, CDT1, CBX5, ZGPAT, SAP30, EIF4EBP1, SIN3B, ATF6B, HSF4, BHLHE41, NRG1, LAG3, SATB1, RCOR2, ZHX2, MECP2, IRF2BP2, SPEN, IRF2BP1, MBD2, GZF1, HES1, PIAS4, NAB2, MAP3K10, TGIF1, ST18, ZFPM1, LCOR, EIF2C3, KDM6B, GLIS3, MTDH, GCLC, TNF, HAT1, TXN1, ATN1, HEXIM1, LANCL2, ZKSCAN17, RNF128, HINFP, BCL3, PER1, BCL6, SKIL, BHLHE40, T…	1686	418	14219	1.75531
GOTERM_BP_ALL	GO:0031324~negative regulation of cellular metabolic process	98	4.40252	1.6501e-07	JDP2, EIF2C1, CCDC85B, IMPACT, EDN1, CBX4, REST, MXI1, CBX5, ZGPAT, SIN3B, EIF4EBP1, INSIG1, ATF6B, SATB1, RCOR2, SOCS1, ZHX2, MECP2, SERPING1, HES1, PIAS4, JUN, TGIF1, ST18, EIF2C3, CAV1, GCLC, TXN1, GIPC1, ATN1, HEXIM1, SKIL, BHLHE40, TCF4, NR1H3, DNMT3A, KLF11, RYBP, SMAD3, SMYD1, EHMT2, FOXP4, FOXP1, HDAC1, RNF2, HOPX, FABP4, MTOR, RBPJ, DNAJB6, NCOR2, PPARD, NFKB1, PAX4, ZEB1, DAXX, CDT1, SA…	1686	489	14219	1.69016
GOTERM_BP_ALL	GO:0010605~negative regulation of macromolecule metabolic process	100	4.49236	2.44947e-07	JDP2, EIF2C1, CCDC85B, IMPACT, CBX4, REST, MXI1, CBX5, ZGPAT, SIN3B, EIF4EBP1, ATF6B, SATB1, RCOR2, RELA, SOCS1, ZHX2, MECP2, SERPING1, HES1, PIAS4, JUN, TGIF1, ST18, EIF2C3, CAV1, GCLC, TXN1, GIPC1, IRAK3, MOV10, ATN1, HEXIM1, SKIL, BHLHE40, TCF4, NR1H3, DNMT3A, KLF11, RYBP, SMAD3, SMYD1, EHMT2, FOXP4, FOXP1, HDAC1, RNF2, HOPX, FABP4, RBPJ, DNAJB6, NCOR2, ADAR, PPARD, BNIP3, NFKB1, PAX4, ZEB1, D…	1686	506	14219	1.66671
GOTERM_BP_ALL	GO:0010629~negative regulation of gene expression	85	3.81851	2.73314e-07	PPARD, JDP2, EIF2C1, CCDC85B, CBX4, BNIP3, NFKB1, PAX4, REST, ZEB1, MXI1, DAXX, CBX5, ZGPAT, SAP30, SIN3B, ATF6B, HSF4, BHLHE41, NRG1, SATB1, RCOR2, ZHX2, MECP2, IRF2BP2, SPEN, IRF2BP1, MBD2, GZF1, HES1, PIAS4, NAB2, MAP3K10, TGIF1, ST18, ZFPM1, LCOR, EIF2C3, KDM6B, GLIS3, MTDH, GCLC, TNF, HAT1, TXN1, MOV10, ATN1, HEXIM1, ZKSCAN17, LANCL2, HINFP, PER1, BCL6, SKIL, BHLHE40, TCF4, NR1H3, ETV3, DNMT…	1686	410	14219	1.74842
GOTERM_BP_ALL	GO:0016481~negative regulation of transcription	79	3.54897	2.76013e-07	PPARD, JDP2, CCDC85B, CBX4, NFKB1, PAX4, REST, ZEB1, MXI1, DAXX, CBX5, ZGPAT, SAP30, SIN3B, ATF6B, HSF4, BHLHE41, NRG1, SATB1, RCOR2, ZHX2, MECP2, IRF2BP2, SPEN, IRF2BP1, MBD2, GZF1, HES1, PIAS4, NAB2, MAP3K10, TGIF1, ST18, ZFPM1, LCOR, KDM6B, GLIS3, MTDH, GCLC, TNF, HAT1, TXN1, ATN1, HEXIM1, ZKSCAN17, LANCL2, HINFP, PER1, BCL6, SKIL, BHLHE40, TCF4, NR1H3, ETV3, DNMT3A, ZBTB7A, NACC1, TNFSF4, JAR…	1686	372	14219	1.791
GOTERM_BP_ALL	GO:0051172~negative regulation of nitrogen compound metabolic process	83	3.72866	4.13503e-07	PPARD, JDP2, CCDC85B, EDN1, CBX4, NFKB1, PAX4, REST, ZEB1, MXI1, DAXX, CDT1, CBX5, ZGPAT, SAP30, SIN3B, ATF6B, HSF4, BHLHE41, NRG1, SATB1, RCOR2, ZHX2, MECP2, IRF2BP2, SPEN, IRF2BP1, MBD2, GZF1, HES1, PIAS4, NAB2, MAP3K10, TGIF1, ST18, ZFPM1, LCOR, KDM6B, GLIS3, CAV1, MTDH, GCLC, TNF, HAT1, TXN1, ATN1, HEXIM1, ZKSCAN17, LANCL2, HINFP, PER1, BCL6, SKIL, BHLHE40, TCF4, NR1H3, ETV3, DNMT3A, ZBTB7A, …	1686	401	14219	1.7456
GOTERM_BP_ALL	GO:0045934~negative regulation of nucleobase, nucleoside, nucleotide and nucleic acid metabolic process	81	3.63881	1.05616e-06	PPARD, JDP2, CCDC85B, EDN1, CBX4, NFKB1, PAX4, REST, ZEB1, MXI1, DAXX, CDT1, CBX5, ZGPAT, SAP30, SIN3B, ATF6B, HSF4, BHLHE41, NRG1, SATB1, RCOR2, ZHX2, MECP2, IRF2BP2, SPEN, IRF2BP1, MBD2, GZF1, HES1, PIAS4, NAB2, MAP3K10, TGIF1, ST18, ZFPM1, LCOR, KDM6B, GLIS3, MTDH, GCLC, TNF, HAT1, TXN1, ATN1, HEXIM1, ZKSCAN17, LANCL2, HINFP, PER1, BCL6, SKIL, BHLHE40, TCF4, NR1H3, ETV3, DNMT3A, ZBTB7A, NACC1,…	1686	397	14219	1.7207
GOTERM_BP_ALL	GO:0045892~negative regulation of transcription, DNA-dependent	66	2.96496	2.11799e-06	PPARD, JDP2, CBX4, NFKB1, PAX4, REST, ZEB1, MXI1, DAXX, CBX5, ZGPAT, SAP30, SIN3B, ATF6B, HSF4, BHLHE41, SATB1, ZHX2, MECP2, IRF2BP2, IRF2BP1, SPEN, MBD2, GZF1, HES1, PIAS4, TGIF1, ST18, ZFPM1, LCOR, KDM6B, GLIS3, MTDH, TNF, HAT1, TXN1, ATN1, HEXIM1, ZKSCAN17, PER1, BCL6, SKIL, BHLHE40, TCF4, ETV3, DNMT3A, ZBTB7A, TNFSF4, JARID2, SAMD11, KLF11, RYBP, SMAD3, SIRT6, EHMT2, FOXP4, FOXP1, ID2, HDAC1,…	1686	308	14219	1.80719
GOTERM_BP_ALL	GO:0051253~negative regulation of RNA metabolic process	66	2.96496	2.66925e-06	PPARD, JDP2, CBX4, NFKB1, PAX4, REST, ZEB1, MXI1, DAXX, CBX5, ZGPAT, SAP30, SIN3B, ATF6B, HSF4, BHLHE41, SATB1, ZHX2, MECP2, IRF2BP2, IRF2BP1, SPEN, MBD2, GZF1, HES1, PIAS4, TGIF1, ST18, ZFPM1, LCOR, KDM6B, GLIS3, MTDH, TNF, HAT1, TXN1, ATN1, HEXIM1, ZKSCAN17, PER1, BCL6, SKIL, BHLHE40, TCF4, ETV3, DNMT3A, ZBTB7A, TNFSF4, JARID2, SAMD11, KLF11, RYBP, SMAD3, SIRT6, EHMT2, FOXP4, FOXP1, ID2, HDAC1,…	1686	310	14219	1.79553
GOTERM_BP_ALL	GO:0000122~negative regulation of transcription from RNA polymerase II promoter	49	2.20126	6.61233e-05	JDP2, PPARD, CBX4, PAX4, ZEB1, MXI1, SAP30, HSF4, BHLHE41, SATB1, ZHX2, IRF2BP2, IRF2BP1, MBD2, GZF1, HES1, PIAS4, TGIF1, ZFPM1, ST18, LCOR, KDM6B, GLIS3, MTDH, TNF, TXN1, ATN1, HEXIM1, ZKSCAN17, PER1, BCL6, SKIL, TCF4, ETV3, ZBTB7A, DNMT3A, JARID2, SAMD11, RYBP, SMAD3, EHMT2, FOXP4, FOXP1, HDAC1, ID2, RNF2, HOPX, RBM15, NCOR2	1686	231	14219	1.78894
Annotation Cluster 3	Enrichment Score: 7.968364881695225
Category	Term	Count	%	PValue	Genes	List Total	Pop Hits	Pop Total	Fold Enrichment
GOTERM_BP_ALL	GO:0006950~response to stress	215	9.65858	4.11135e-11	PTGS2, EDN1, PTTG1, SYT7, S1PR3, CRY2, GAB1, INSIG1, TLK2, CRY1, HIGD1A, F10, C4A, NCF1, MECP2, POLB, SERPING1, F7, PLAUR, DCLRE1C, IFNB1, SERPINF2, F3, VEGFA, MAPK8, DCBLD2, IL1R1, NFKBID, PTPLAD1, HSPA1A, HSPA1B, SERPINH1, CD74, HSPA1L, PROCR, KLKB1, FCER1G, DHX58, PLAT, IL23R, MAP2K1, HC, CFB, SPHK1, TREX1, FTSJD2, CHRNB2, RBPJ, AHSA2, AHSA1, PPARD, H2-D1, BNIP3, GJA1, HSPH1, ANKRD17, NOD2, NO…	1686	1184	14219	1.53143
GOTERM_BP_ALL	GO:0006954~inflammatory response	60	2.69542	2.01684e-09	TLR1, CXCL11, TLR7, CXCL10, S1PR3, NOD2, SAA1, TICAM1, TICAM2, IL1B, NOS2, LTA, IL1A, NFKBIZ, C4A, NCF1, IL27, SAA3, SERPING1, NLRP3, HIF1A, IL20RB, SERPINF2, PLA2G7, PTAFR, KDM6B, CXCL1, CCL3, TNF, CCL2, NFKBID, C3, CXCL3, CXCL2, CXCL9, CCL5, CCL4, CCL7, MIF, CCL24, CCL22, TNFRSF1B, MEFV, KLKB1, THBS1, IL6, IL23R, TNFSF4, OLR1, CFB, HC, SPHK1, IDO1, STAT3, CCL12, NUPR1, SLC7A2, IL1F6, CD14, IGFB…	1686	225	14219	2.24895
GOTERM_BP_ALL	GO:0009611~response to wounding	80	3.59389	5.45276e-09	GNA13, PPARD, TLR1, GJA1, SYT7, CXCL11, TLR7, CXCL10, S1PR3, NOD2, SLC1A2, SAA1, TICAM1, TICAM2, IL1B, NOS2, LTA, IL1A, NFKBIZ, F10, C4A, NCF1, IL27, SAA3, SERPING1, F7, NLRP3, PLAUR, HIF1A, IL20RB, SERPINF2, F3, CD81, PLA2G7, LCP1, PTAFR, KDM6B, CXCL1, DCBLD2, CCL3, CCL2, TNF, NFKBID, C3, CXCL3, CXCL2, CXCL9, NINJ1, CCL5, CCL4, DTNBP1, CCL7, MIF, CCL24, CCL22, TNFRSF1B, MEFV, PROCR, KLKB1, THBS1…	1686	347	14219	1.94434
GOTERM_BP_ALL	GO:0006952~defense response	92	4.13297	1.30987e-07	TBK1, TLR1, H2-D1, BNIP3, CXCL11, PRDX1, TLR7, IL10, TAPBP, CXCL10, S1PR3, NOD2, NOD1, SAA1, IL1RAP, TICAM1, TICAM2, IL1B, NOS2, MX1, MX2, IL1A, LTA, H2-K1, NFKBIZ, BCL10, H2-L, C4A, NCF1, IL27, RELA, SAA3, MECP2, SERPING1, NLRP3, HIF1A, IL20RB, IFNB1, SERPINF2, PLA2G7, RIPK2, KDM6B, PTAFR, CXCL1, IFIH1, IL1R1, CCL3, CCL2, TNF, NFKBID, C3, CXCL3, CXCL2, CXCL9, RSAD2, CCL5, CCL4, CD74, CCL7, MIF, …	1686	448	14219	1.73189
GOTERM_BP_ALL	GO:0009605~response to external stimulus	116	5.21114	2.43039e-06	GNA13, TLR1, SYT7, CXCL11, TLR7, CXCL10, S1PR3, ATF6B, IL1B, CSF3R, IL1A, SATB1, ATG9A, F10, C4A, NCF1, IL27, MECP2, SERPING1, F7, DDIT3, PLAUR, CCR7, HIF1A, SERPINF2, F3, CCR3, DCBLD2, CCL3, CCL2, NFKBID, ADORA2B, ADORA2A, ENPP2, CCL9, NINJ1, CCL5, CCL4, CCL7, ITGAM, RAC2, PROCR, KLKB1, FCER1G, BHLHE40, IL23R, CFB, HC, SPHK1, NR4A2, NR4A3, NFKBIL1, SLC7A2, CXCL16, NRP2, PPARD, GJA1, SLC1A2, NOD2…	1686	640	14219	1.52858
Annotation Cluster 4	Enrichment Score: 7.763515403646372
Category	Term	Count	%	PValue	Genes	List Total	Pop Hits	Pop Total	Fold Enrichment
GOTERM_BP_ALL	GO:0048518~positive regulation of biological process	298	13.3872	8.29682e-22	PGF, STAT5A, FST, EDN1, LPAR2, EDIL3, RORA, LPAR1, ITSN1, CITED4, SIRPB1A, CD47, S1PR1, GAB1, FAS, ICOSL, C4A, PDPN, RXRA, MECP2, SERPING1, CD40, MED13, PIM2, BCL2L11, PDCD1LG2, HES1, VEGFC, CD38, PIAS4, JUN, VEGFA, TGIF1, MAPK8, CDK5R1, NFKBID, STK17B, PPT2, NFKBIA, CACNB3, SFPI1, BCL2L1, CD74, LIF, PLAGL1, LOC100038947, RAC2, TRP53BP2, FCER1G, AGRN, PLAGL2, ODC1, ESRRA, SPHK2, TM2D1, MAP2K1, HC…	1686	1493	14219	1.68332
GOTERM_BP_ALL	GO:0048522~positive regulation of cellular process	270	12.1294	3.11735e-21	PGF, STAT5A, EDN1, LPAR2, EDIL3, RORA, LPAR1, ITSN1, CITED4, SIRPB1A, CD47, S1PR1, GAB1, FAS, ICOSL, PDPN, RXRA, MECP2, CD40, MED13, PIM2, PDCD1LG2, BCL2L11, HES1, VEGFC, CD38, PIAS4, JUN, VEGFA, TGIF1, MAPK8, CDK5R1, NFKBID, STK17B, PPT2, SFPI1, BCL2L1, CD74, LIF, PLAGL1, LOC100038947, RAC2, TRP53BP2, FCER1G, AGRN, PLAGL2, ODC1, ESRRA, TM2D1, MAP2K1, SPHK2, MAML1, SPHK1, CREBBP, SMAD3, KDR, NOTC…	1686	1320	14219	1.72505
GOTERM_BP_ALL	GO:0009891~positive regulation of biosynthetic process	112	5.03145	1.60168e-08	TBK1, STAT5A, TLR1, ARNT2, ZXDB, CASK, RORA, TLR7, CITED4, IL10, GATA2, S1PR1, MDFIC, TDGF1, IL1B, MLL1, BCL10, ICOSL, RXRA, RELA, MECP2, MED13, AHR, DDIT3, HES1, HIF1A, JUN, VEGFA, SIX1, NFE2L2, CAMTA2, ADORA2B, ADORA2A, SOX5, ELK1, SFPI1, SRF, LIF, PLAGL1, DYRK2, AGRN, TRAF6, RUNX2, PLAGL2, ESRRA, EPAS1, MAML1, CREBBP, NR4A2, NR4A1, SMAD3, NR4A3, ABCG4, ATF4, NOTCH1, EAF1, CSRNP2, ETS1, CSRNP1,…	1686	557	14219	1.6958
GOTERM_BP_ALL	GO:0006357~regulation of transcription from RNA polymerase II promoter	120	5.39084	3.04734e-08	JDP2, STAT5A, ARNT2, CBX4, CASK, RORA, HMGN5, MXI1, GATA2, S1PR1, MED26, TDGF1, MLL1, SATB1, RXRA, ZHX2, MED13, AHR, HES1, HIF1A, MED15, PIAS4, JUN, VEGFA, SIX1, MNDA, TGIF1, ST18, CAMTA2, SOX5, ELK1, TXN1, SRF, LIF, NR1H2, PLAGL1, ATN1, HEXIM1, SKIL, AGRN, TCF4, RUNX2, PLAGL2, DNMT3A, ESRRA, EPAS1, MAML1, CREBBP, RYBP, NR4A2, KLF16, NR4A1, SMAD3, NR4A3, EHMT2, MED13L, FOXP4, FOXP1, ATF4, NOTCH1,…	1686	616	14219	1.6429
GOTERM_BP_ALL	GO:0009893~positive regulation of metabolic process	130	5.84007	3.14168e-08	TBK1, STAT5A, TLR1, ARNT2, ROMO1, ZXDB, CASK, RORA, CITED4, TLR7, PNP, IL10, GATA2, S1PR1, MDFIC, TDGF1, IL1B, MLL1, BCL10, ICOSL, RXRA, RELA, MECP2, PIM2, MED13, CD40, AHR, DDIT3, HES1, HIF1A, PIAS4, JUN, SIX1, VEGFA, NFE2L2, CAMTA2, GCLC, ADORA2B, ADORA2A, SOX5, ELK1, SFPI1, SRF, PLAGL1, LIF, DYRK2, AGRN, TRAF6, RUNX2, PLAGL2, ESRRA, EPAS1, MAML1, CREBBP, NR4A2, SMAD3, NR4A1, NR4A3, ABCG4, ATF4…	1686	683	14219	1.60522
GOTERM_BP_ALL	GO:0031325~positive regulation of cellular metabolic process	124	5.57053	3.49029e-08	TBK1, STAT5A, TLR1, ARNT2, ROMO1, ZXDB, CASK, RORA, CITED4, TLR7, PNP, GATA2, S1PR1, MDFIC, TDGF1, IL1B, MLL1, BCL10, ICOSL, RXRA, RELA, MECP2, PIM2, MED13, CD40, AHR, DDIT3, HES1, HIF1A, PIAS4, JUN, VEGFA, SIX1, NFE2L2, CAMTA2, GCLC, ADORA2B, ADORA2A, SOX5, ELK1, SFPI1, SRF, PLAGL1, LIF, DYRK2, AGRN, TRAF6, RUNX2, PLAGL2, ESRRA, EPAS1, MAML1, CREBBP, NR4A2, SMAD3, NR4A1, NR4A3, ATF4, NOTCH1, EAF…	1686	644	14219	1.62386
GOTERM_BP_ALL	GO:0031328~positive regulation of cellular biosynthetic process	109	4.89668	6.86851e-08	TBK1, STAT5A, TLR1, ARNT2, ZXDB, CASK, RORA, TLR7, CITED4, GATA2, S1PR1, MDFIC, TDGF1, IL1B, MLL1, BCL10, ICOSL, RXRA, RELA, MECP2, MED13, AHR, DDIT3, HES1, HIF1A, JUN, VEGFA, SIX1, NFE2L2, CAMTA2, ADORA2B, ADORA2A, SOX5, ELK1, SFPI1, SRF, LIF, PLAGL1, DYRK2, AGRN, TRAF6, RUNX2, PLAGL2, ESRRA, EPAS1, MAML1, CREBBP, NR4A2, NR4A1, SMAD3, NR4A3, ATF4, NOTCH1, EAF1, CSRNP2, ETS1, CSRNP1, DCP1A, GTF2F…	1686	552	14219	1.66532
GOTERM_BP_ALL	GO:0010604~positive regulation of macromolecule metabolic process	119	5.34591	2.56304e-07	TBK1, STAT5A, TLR1, ARNT2, ZXDB, CASK, RORA, CITED4, TLR7, PNP, IL10, GATA2, S1PR1, MDFIC, TDGF1, IL1B, MLL1, BCL10, ICOSL, RXRA, RELA, MECP2, MED13, CD40, AHR, DDIT3, HES1, HIF1A, PIAS4, JUN, VEGFA, SIX1, NFE2L2, CAMTA2, GCLC, SOX5, ELK1, SFPI1, SRF, PLAGL1, LIF, DYRK2, AGRN, TRAF6, RUNX2, PLAGL2, ESRRA, EPAS1, MAML1, CREBBP, NR4A2, SMAD3, NR4A1, NR4A3, ATF4, NOTCH1, CBLB, EAF1, CSRNP2, ETS1, CS…	1686	633	14219	1.58546
GOTERM_BP_ALL	GO:0010557~positive regulation of macromolecule biosynthetic process	102	4.58221	6.80551e-07	TBK1, STAT5A, TLR1, ARNT2, ZXDB, CASK, RORA, TLR7, CITED4, IL10, GATA2, S1PR1, MDFIC, TDGF1, IL1B, MLL1, BCL10, ICOSL, RXRA, RELA, MECP2, MED13, DDIT3, AHR, HES1, HIF1A, JUN, VEGFA, SIX1, NFE2L2, CAMTA2, SOX5, ELK1, SFPI1, SRF, LIF, PLAGL1, DYRK2, AGRN, TRAF6, RUNX2, PLAGL2, ESRRA, EPAS1, MAML1, CREBBP, NR4A2, NR4A1, SMAD3, NR4A3, ATF4, NOTCH1, EAF1, ETS1, CSRNP2, CSRNP1, DCP1A, GTF2F1, HIVEP3, H…	1686	530	14219	1.62306
GOTERM_BP_ALL	GO:0051173~positive regulation of nitrogen compound metabolic process	101	4.53729	8.5885e-07	STAT5A, ARNT2, ZXDB, CASK, RORA, PNP, CITED4, GATA2, S1PR1, MDFIC, TDGF1, MLL1, BCL10, RXRA, RELA, MECP2, MED13, CD40, DDIT3, AHR, HES1, HIF1A, JUN, VEGFA, SIX1, NFE2L2, CAMTA2, ADORA2B, ADORA2A, SOX5, ELK1, SFPI1, SRF, LIF, PLAGL1, AGRN, RUNX2, PLAGL2, ESRRA, EPAS1, MAML1, CREBBP, NR4A2, NR4A1, SMAD3, NR4A3, ATF4, NOTCH1, EAF1, ETS1, CSRNP2, CSRNP1, DCP1A, GTF2F1, HIVEP3, FTSJD2, HSP90AB1, HTATI…	1686	526	14219	1.61937
GOTERM_BP_ALL	GO:0045935~positive regulation of nucleobase, nucleoside, nucleotide and nucleic acid metabolic process	96	4.31267	4.02557e-06	HTATIP2, GPBP1, STAT5A, MITF, ARNT2, ZXDB, CASK, NFKB1, ZEB1, RORA, CITED4, PNP, HNRPLL, GATA2, S1PR1, MDFIC, TDGF1, HSF4, FOSL1, MLL1, SERTAD1, BCL10, EGR2, RXRA, RELA, MECP2, CD40, MED13, HMGA1, AHR, DDIT3, OSM, HES1, INHBA, HIF1A, JUN, ZMIZ1, VEGFA, SIX1, NFE2L2, GLIS3, ABLIM2, CAMTA2, ING2, TNF, ADORA2B, ADORA2A, SOX5, ELK1, SFPI1, ZBTB17, SRF, ARID2, LIF, PLAGL1, REL, POU2F2, NFAT5, HINFP, B…	1686	510	14219	1.5875
GOTERM_BP_ALL	GO:0045941~positive regulation of transcription	89	3.9982	1.13058e-05	HTATIP2, GPBP1, STAT5A, ARNT2, MITF, ZXDB, CASK, NFKB1, ZEB1, RORA, CITED4, GATA2, S1PR1, MDFIC, TDGF1, HSF4, FOSL1, MLL1, SERTAD1, BCL10, EGR2, RXRA, RELA, MECP2, MED13, HMGA1, AHR, DDIT3, OSM, HES1, INHBA, HIF1A, JUN, ZMIZ1, VEGFA, SIX1, NFE2L2, GLIS3, ABLIM2, CAMTA2, ING2, TNF, SOX5, ELK1, SFPI1, ZBTB17, SRF, ARID2, LIF, PLAGL1, REL, POU2F2, NFAT5, HINFP, BCL3, AGRN, POU3F1, ING1, RUNX2, PLAGL…	1686	475	14219	1.58018
GOTERM_BP_ALL	GO:0010628~positive regulation of gene expression	90	4.04313	1.89196e-05	HTATIP2, GPBP1, STAT5A, ARNT2, MITF, ZXDB, CASK, NFKB1, ZEB1, RORA, CITED4, GATA2, S1PR1, MDFIC, TDGF1, HSF4, FOSL1, MLL1, SERTAD1, BCL10, EGR2, RXRA, RELA, MECP2, MED13, HMGA1, AHR, DDIT3, OSM, HES1, INHBA, HIF1A, JUN, ZMIZ1, VEGFA, SIX1, NFE2L2, GLIS3, ABLIM2, CAMTA2, ING2, TNF, LRRC32, SOX5, ELK1, SFPI1, ZBTB17, SRF, ARID2, LIF, PLAGL1, REL, POU2F2, NFAT5, HINFP, BCL3, AGRN, POU3F1, ING1, RUNX…	1686	488	14219	1.55537
GOTERM_BP_ALL	GO:0051254~positive regulation of RNA metabolic process	78	3.50404	5.24172e-05	HTATIP2, GPBP1, STAT5A, ARNT2, MITF, CASK, NFKB1, RORA, ZEB1, HNRPLL, GATA2, S1PR1, MDFIC, TDGF1, HSF4, FOSL1, MLL1, BCL10, EGR2, RXRA, RELA, MECP2, MED13, AHR, OSM, HES1, INHBA, HIF1A, ZMIZ1, JUN, VEGFA, SIX1, NFE2L2, GLIS3, ABLIM2, CAMTA2, TNF, SOX5, ELK1, SFPI1, ZBTB17, SRF, ARID2, LIF, PLAGL1, REL, NFAT5, HINFP, BCL3, AGRN, POU3F1, RUNX2, PLAGL2, MAF, ESRRA, IL6, CEBPB, EPAS1, CEBPD, MAML1, C…	1686	419	14219	1.56997
GOTERM_BP_ALL	GO:0045893~positive regulation of transcription, DNA-dependent	77	3.45912	7.13322e-05	HTATIP2, GPBP1, STAT5A, ARNT2, MITF, CASK, NFKB1, RORA, ZEB1, GATA2, S1PR1, MDFIC, TDGF1, HSF4, FOSL1, MLL1, BCL10, EGR2, RXRA, RELA, MECP2, MED13, AHR, OSM, HES1, INHBA, HIF1A, ZMIZ1, JUN, VEGFA, SIX1, NFE2L2, GLIS3, ABLIM2, CAMTA2, TNF, SOX5, ELK1, SFPI1, ZBTB17, SRF, ARID2, LIF, PLAGL1, REL, NFAT5, HINFP, BCL3, AGRN, POU3F1, RUNX2, PLAGL2, MAF, ESRRA, IL6, CEBPB, EPAS1, CEBPD, MAML1, CREBBP, N…	1686	416	14219	1.56102
GOTERM_BP_ALL	GO:0045944~positive regulation of transcription from RNA polymerase II promoter	63	2.83019	0.00132538	HTATIP2, STAT5A, ARNT2, MITF, CASK, NFKB1, RORA, ZEB1, GATA2, S1PR1, TDGF1, HSF4, FOSL1, MLL1, EGR2, RXRA, MED13, AHR, OSM, HES1, INHBA, HIF1A, ZMIZ1, JUN, SIX1, VEGFA, GLIS3, ABLIM2, CAMTA2, TNF, SOX5, ELK1, ARID2, SRF, LIF, PLAGL1, NFAT5, BCL3, POU3F1, AGRN, RUNX2, PLAGL2, MAF, ESRRA, IL6, CEBPB, EPAS1, CEBPD, MAML1, CREBBP, NR4A2, SMAD3, NR4A1, NR4A3, STAT3, ATF4, NOTCH1, EAF1, ETS1, CSRNP2, C…	1686	358	14219	1.48412
Annotation Cluster 5	Enrichment Score: 7.150086889727063
Category	Term	Count	%	PValue	Genes	List Total	Pop Hits	Pop Total	Fold Enrichment
GOTERM_BP_ALL	GO:0009987~cellular process	1264	56.7835	4.57496e-21	MED25, PGAM1, RPLP2, VPRBP, RORA, MYLIP, REST, SART3, ITSN1, MAP3K6, USP53, ISG15, CUL7, MED28, MED26, CUL9, RPLP1, MAP3K8, CDH24, VNN3, PIK3CG, ARC, ICOSL, BRAF, RREB1, PDPN, UGCG, MECP2, UBE2J2, MED13, MARK4, JUP, NPC2, MED15, MAPK6, ZWINT, JUN, RYR1, ARL8A, MAPK8, MAPK7, PMP22, SH3GL1, DCBLD2, CRTC2, PPP2R3A, CACNB1, CACNB2, NFKBIA, BCL2L2, BCL2L1, ARF5, SERPINH1, VPS72, ALCAM, DUSP18, ARIH2, …	1686	9252	14219	1.15219
GOTERM_BP_ALL	GO:0019222~regulation of metabolic process	475	21.3387	4.94352e-15	MED25, RORA, REST, MXI1, CITED4, MED28, MED26, ICOSL, RREB1, RCOR2, RXRA, MECP2, ZHX2, SERPING1, HMG20B, MED13, UBE2J2, MED15, JUN, FLII, TGIF1, ST18, CRTC2, NFKBID, NFKBIA, VPS72, ATN1, HEXIM1, ARG2, DUSP16, CASZ1, TCF4, DNMT3A, ESRRA, SPHK2, MAP2K1, KLF11, SPHK1, KLF16, SFMBT1, ZSCAN2, TGFBR3, HTATIP2, ZNFX1, BNIP3, LATS1, DAXX, NOD2, HLX, TICAM1, ANP32A, SPIC, HSF4, MYB, BHLHE41, LAG3, SERTAD1…	1686	2942	14219	1.36164
GOTERM_BP_ALL	GO:0031323~regulation of cellular metabolic process	445	19.991	3.51264e-13	MED25, RORA, REST, MXI1, CITED4, MED28, MED26, ICOSL, RCOR2, RREB1, RXRA, MECP2, ZHX2, SERPING1, HMG20B, MED13, MED15, JUN, FLII, TGIF1, ST18, CRTC2, NFKBID, NFKBIA, VPS72, ATN1, HEXIM1, ARG2, DUSP16, CASZ1, TCF4, DNMT3A, ESRRA, SPHK2, MAP2K1, KLF11, SPHK1, KLF16, SFMBT1, ZSCAN2, TGFBR3, HTATIP2, ZNFX1, LATS1, DAXX, NOD2, HLX, TICAM1, ANP32A, SPIC, HSF4, MYB, BHLHE41, LAG3, SERTAD1, NFKBIZ, LYN, …	1686	2786	14219	1.34707
GOTERM_BP_ALL	GO:0060255~regulation of macromolecule metabolic process	432	19.407	3.54332e-13	MED25, RORA, REST, MXI1, CITED4, MED28, MED26, ICOSL, RCOR2, RREB1, RXRA, ZHX2, MECP2, HMG20B, SERPING1, MED13, UBE2J2, MED15, JUN, FLII, TGIF1, ST18, CRTC2, NFKBID, NFKBIA, VPS72, ATN1, HEXIM1, CASZ1, TCF4, DNMT3A, ESRRA, KLF11, KLF16, ZSCAN2, SFMBT1, TGFBR3, HTATIP2, ZNFX1, BNIP3, DAXX, NOD2, HLX, TICAM1, ANP32A, SPIC, HSF4, MYB, BHLHE41, LAG3, SERTAD1, NFKBIZ, LYN, TLE3, RSLCAN18, FOSB, TLE2, …	1686	2688	14219	1.3554
GOTERM_BP_ALL	GO:0050789~regulation of biological process	909	40.8356	3.12491e-12	PPP2R5A, MED25, RORA, REST, ITSN1, SIRPB1A, CUL7, MED28, MED26, CUL9, SERPINE1, MAP3K8, PIK3CG, ICOSL, C4A, BRAF, RREB1, PDPN, MECP2, SIPA1L2, SERPING1, MED13, UBE2J2, GEM, MED15, JUN, SIPA1L1, RYR1, ARL8A, MAPK8, MAPK7, DCBLD2, CRTC2, PPP2R3A, RALGPS1, NFKBID, NFKBIA, CACNB3, BCL2L2, ARF5, BCL2L1, VPS72, ATN1, RAC2, RAC3, ARG2, KLKB1, DUSP16, CASZ1, FGL2, GUCY2G, ESRRA, HC, ZSCAN2, SFMBT1, BFAR,…	1686	6542	14219	1.17183
GOTERM_BP_ALL	GO:0080090~regulation of primary metabolic process	424	19.0476	4.86721e-12	MED25, REST, RORA, MXI1, CITED4, MED28, MED26, RCOR2, RREB1, RXRA, ZHX2, MECP2, HMG20B, SERPING1, MED13, UBE2J2, MED15, JUN, FLII, TGIF1, ST18, CRTC2, NFKBID, NFKBIA, VPS72, ATN1, HEXIM1, CASZ1, TCF4, DNMT3A, ESRRA, KLF11, KLF16, ZSCAN2, SFMBT1, TGFBR3, HTATIP2, ZNFX1, DAXX, NOD2, HLX, TICAM1, ANP32A, SPIC, HSF4, MYB, BHLHE41, SERTAD1, NFKBIZ, LYN, TLE3, RSLCAN18, FOSB, TLE2, MXD1, JMY, INHBA, BR…	1686	2672	14219	1.33826
GOTERM_BP_ALL	GO:0065007~biological regulation	943	42.363	6.95482e-11	PPP2R5A, MED25, RORA, REST, ITSN1, SIRPB1A, CUL7, MED28, MED26, CUL9, SERPINE1, MAP3K8, PIK3CG, ICOSL, C4A, BRAF, RREB1, PDPN, MECP2, SIPA1L2, SERPING1, MED13, F7, UBE2J2, GEM, NPC2, MED15, F3, JUN, SIPA1L1, RYR1, ARL8A, MAPK8, MAPK7, PMP22, DCBLD2, CRTC2, PPP2R3A, RALGPS1, NFKBID, NFKBIA, CACNB3, BCL2L2, ARF5, BCL2L1, VPS72, ATN1, RAC2, RAC3, ARG2, KLKB1, DUSP16, CASZ1, FGL2, GUCY2G, ESRRA, HC, …	1686	6903	14219	1.15209
GOTERM_BP_ALL	GO:0050794~regulation of cellular process	862	38.7242	7.54822e-11	PPP2R5A, MED25, RORA, REST, ITSN1, SIRPB1A, MED28, CUL7, MED26, CUL9, SERPINE1, MAP3K8, PIK3CG, ICOSL, BRAF, RREB1, PDPN, MECP2, SIPA1L2, SERPING1, MED13, GEM, MED15, JUN, SIPA1L1, RYR1, ARL8A, MAPK8, DCBLD2, CRTC2, PPP2R3A, RALGPS1, NFKBID, NFKBIA, BCL2L2, ARF5, BCL2L1, VPS72, ATN1, RAC2, RAC3, ARG2, DUSP16, CASZ1, FGL2, GUCY2G, ESRRA, SFMBT1, ZSCAN2, BFAR, CDC42BPG, RGS1, ARF4, RGS9, PLCXD2, PP…	1686	6224	14219	1.16802
GOTERM_BP_ALL	GO:0031326~regulation of cellular biosynthetic process	390	17.5202	9.01463e-11	MED25, REST, RORA, MXI1, CITED4, MED28, MED26, ICOSL, RCOR2, RREB1, RXRA, ZHX2, MECP2, HMG20B, MED13, MED15, JUN, FLII, TGIF1, ST18, CRTC2, NFKBID, NFKBIA, VPS72, ATN1, HEXIM1, ARG2, CASZ1, TCF4, DNMT3A, ESRRA, KLF11, KLF16, ZSCAN2, SFMBT1, TGFBR3, HTATIP2, ZNFX1, DAXX, NOD2, HLX, TICAM1, ANP32A, SPIC, HSF4, MYB, BHLHE41, LAG3, SERTAD1, NFKBIZ, TLE3, RSLCAN18, FOSB, TLE2, MXD1, JMY, INHBA, BRWD1,…	1686	2467	14219	1.33324
GOTERM_BP_ALL	GO:0009889~regulation of biosynthetic process	391	17.5651	9.76532e-11	MED25, REST, RORA, MXI1, CITED4, MED28, MED26, ICOSL, RCOR2, RREB1, RXRA, ZHX2, MECP2, HMG20B, MED13, MED15, JUN, FLII, TGIF1, ST18, CRTC2, NFKBID, NFKBIA, VPS72, ATN1, HEXIM1, ARG2, CASZ1, TCF4, DNMT3A, ESRRA, KLF11, KLF16, ZSCAN2, SFMBT1, TGFBR3, HTATIP2, ZNFX1, DAXX, NOD2, HLX, TICAM1, ANP32A, SPIC, HSF4, MYB, BHLHE41, LAG3, SERTAD1, NFKBIZ, TLE3, RSLCAN18, FOSB, TLE2, MXD1, JMY, INHBA, BRWD1,…	1686	2476	14219	1.3318
GOTERM_BP_ALL	GO:0010556~regulation of macromolecule biosynthetic process	376	16.8913	2.62875e-10	EIF2C1, STAT5A, MED25, RORA, REST, MXI1, HMGN5, CITED4, ZGPAT, SIN3B, CRY2, S1PR1, MED28, MED26, CRY1, FIZ1, ICOSL, RCOR2, RREB1, RXRA, ZFP628, MECP2, ZHX2, HMG20B, MED13, HES1, ZFP827, MED15, PIAS4, JUN, VEGFA, MNT, TGIF1, FLII, ZFP821, PRDM2, ST18, EIF2C3, CRTC2, NFKBID, ELL, NFKBIA, TXN1, IGF2BP2, SFPI1, VPS72, LIF, NR1H2, PLAGL1, ATN1, HEXIM1, LHX2, CASZ1, AGRN, ZFP811, TCF4, PLAGL2, NR1H3, D…	1686	2381	14219	1.3318
GOTERM_BP_ALL	GO:0051171~regulation of nitrogen compound metabolic process	374	16.8014	3.83489e-10	EIF2C1, STAT5A, ADCY6, EDN1, MED25, RORA, REST, MXI1, HMGN5, CITED4, S1PR3, ZGPAT, SIN3B, CRY2, S1PR1, MED28, MED26, CRY1, FIZ1, RCOR2, RREB1, RXRA, ZFP628, MECP2, ZHX2, HMG20B, CD40, MED13, HES1, ZFP827, MED15, PIAS4, JUN, HTR7, VEGFA, MNT, TGIF1, FLII, ZFP821, PRDM2, ST18, CRTC2, NFKBID, ELL, NFKBIA, TXN1, SFPI1, VPS72, LIF, NR1H2, PLAGL1, ATN1, HEXIM1, LHX2, ARG2, CASZ1, AGRN, ZFP811, TCF4, PL…	1686	2372	14219	1.32975
GOTERM_BP_ALL	GO:0010468~regulation of gene expression	379	17.0261	9.81612e-10	EIF2C1, STAT5A, MED25, RORA, REST, MXI1, HMGN5, CITED4, ZGPAT, SIN3B, CRY2, S1PR1, MED28, MED26, CRY1, FIZ1, RCOR2, RREB1, RXRA, ZFP628, MECP2, ZHX2, SERPING1, HMG20B, MED13, HES1, ZFP827, MED15, PIAS4, JUN, VEGFA, MNT, TGIF1, FLII, ZFP821, PRDM2, ST18, EIF2C3, CRTC2, NFKBID, ELL, NFKBIA, TXN1, IGF2BP2, SFPI1, VPS72, LIF, NR1H2, PLAGL1, MOV10, ATN1, HEXIM1, LHX2, CASZ1, AGRN, ZFP811, TCF4, PLAGL2…	1686	2429	14219	1.3159
GOTERM_BP_ALL	GO:0019219~regulation of nucleobase, nucleoside, nucleotide and nucleic acid metabolic process	367	16.487	2.21299e-09	EIF2C1, STAT5A, ADCY6, EDN1, MED25, RORA, REST, MXI1, HMGN5, CITED4, S1PR3, ZGPAT, SIN3B, CRY2, S1PR1, MED28, MED26, CRY1, FIZ1, RCOR2, RREB1, RXRA, ZFP628, MECP2, ZHX2, HMG20B, CD40, MED13, HES1, ZFP827, MED15, PIAS4, JUN, HTR7, VEGFA, MNT, TGIF1, FLII, ZFP821, PRDM2, ST18, CRTC2, NFKBID, ELL, NFKBIA, TXN1, SFPI1, VPS72, LIF, NR1H2, PLAGL1, ATN1, HEXIM1, LHX2, CASZ1, AGRN, ZFP811, TCF4, PLAGL2, …	1686	2353	14219	1.31539
GOTERM_BP_ALL	GO:0045449~regulation of transcription	350	15.7233	2.4458e-09	EIF2C1, STAT5A, MED25, RORA, REST, MXI1, HMGN5, CITED4, ZGPAT, SIN3B, CRY2, S1PR1, MED28, MED26, CRY1, FIZ1, RCOR2, RREB1, RXRA, ZFP628, MECP2, ZHX2, HMG20B, MED13, HES1, ZFP827, MED15, PIAS4, JUN, VEGFA, MNT, TGIF1, FLII, ZFP821, PRDM2, ST18, CRTC2, NFKBID, ELL, NFKBIA, TXN1, SFPI1, VPS72, LIF, NR1H2, PLAGL1, ATN1, HEXIM1, LHX2, CASZ1, AGRN, ZFP811, TCF4, PLAGL2, NR1H3, DNMT3A, ESRRA, ZBTB46, KL…	1686	2227	14219	1.32544
GOTERM_BP_ALL	GO:0044260~cellular macromolecule metabolic process	628	28.212	7.33531e-07	SCAF1, MED25, RPLP2, VPRBP, MYLIP, RORA, REST, MXI1, SART3, CITED4, MAP3K6, USP53, ISG15, CUL7, CLK3, MED28, CTGF, MED26, CUL9, CLK4, MAP3K8, RPLP1, TLK2, PIK3CG, ICOSL, PTPRF, BRAF, RREB1, RCOR2, RXRA, MECP2, ZHX2, HMG20B, PTPRU, MED13, UBE2J2, PTPRN, MARK4, MAPK6, MED15, JUN, TGIF1, FLII, PELO, MAPK8, ST18, MAPK7, CRTC2, PPP2R3A, PPT2, HSPA1A, BCL2L2, HSPA1B, VPS72, HSPA1L, DUSP18, ARIH2, PPP1R…	1686	4549	14219	1.16427
GOTERM_BP_ALL	GO:0006350~transcription	273	12.2642	1.40478e-06	SCAF1, EIF2C1, STAT5A, MED25, RORA, REST, MXI1, HMGN5, CITED4, ZGPAT, SIN3B, CRY2, MED28, MED26, CRY1, FIZ1, RCOR2, RREB1, RXRA, ZFP628, MECP2, ZHX2, HMG20B, MED13, HES1, ZFP827, MED15, PIAS4, JUN, MNT, TGIF1, FLII, ZFP821, ST18, CRTC2, ELL, SFPI1, VPS72, NR1H2, HEXIM1, LHX2, CASZ1, ZFP811, TCF4, NR1H3, DNMT3A, ESRRA, ZBTB46, KLF9, MAML1, KLF11, CREBBP, KLF16, RYBP, SMAD3, SMYD1, ZSCAN2, ZFHX4, N…	1686	1772	14219	1.2993
GOTERM_BP_ALL	GO:0044237~cellular metabolic process	784	35.2201	1.68186e-06	PGAM1, MED25, RPLP2, VPRBP, MYLIP, RORA, REST, SART3, MAP3K6, USP53, MED28, CUL7, ISG15, CUL9, MED26, MAP3K8, RPLP1, VNN3, PIK3CG, ICOSL, BRAF, PDPN, RREB1, UGCG, MECP2, MED13, UBE2J2, MARK4, MAPK6, MED15, JUN, MAPK8, MAPK7, CRTC2, PPP2R3A, BCL2L2, VPS72, DUSP18, ARIH2, ATN1, DUSP13, DUSP14, ARG2, DUSP16, CASZ1, GUCY2G, ESRRA, ACER2, EPM2A, ATP11A, ZSCAN2, DUSP28, CDC42BPG, SMURF1, SRMS, PPP2R3D,…	1686	5857	14219	1.12889
GOTERM_BP_ALL	GO:0043170~macromolecule metabolic process	689	30.9524	5.51061e-06	SCAF1, MED25, RPLP2, VPRBP, MYLIP, RORA, REST, MXI1, SART3, CITED4, MAP3K6, USP53, PGPEP1, ISG15, CUL7, CLK3, MED28, CTGF, MED26, FAP, CUL9, CLK4, MAP3K8, RPLP1, FAS, TLK2, PIK3CG, ICOSL, C4A, PTPRF, BRAF, RREB1, RCOR2, RXRA, MECP2, ZHX2, SERPING1, HMG20B, PTPRU, MED13, F7, UBE2J2, PTPRN, MARK4, MAPK6, MED15, JUN, TGIF1, FLII, ADAMTS1, PELO, MAPK8, ST18, MAPK7, ASPRV1, ADAMTS4, CRTC2, PPP2R3A, PP…	1686	5110	14219	1.13713
GOTERM_BP_ALL	GO:0044238~primary metabolic process	821	36.8823	6.90258e-06	PGAM1, MED25, RPLP2, VPRBP, RORA, MYLIP, REST, SART3, MAP3K6, USP53, MED28, CUL7, ISG15, MED26, CUL9, MAP3K8, RPLP1, VNN3, PIK3CG, ICOSL, BRAF, C4A, PDPN, RREB1, UGCG, MECP2, SERPING1, MED13, F7, UBE2J2, MARK4, MAPK6, MED15, JUN, MAPK8, MAPK7, CRTC2, PPP2R3A, BCL2L2, SERPINH1, VPS72, DUSP18, ARIH2, DUSP13, DUSP14, ARG2, KLKB1, DUSP16, CASZ1, GUCY2G, ESRRA, HC, ACER2, EPM2A, ATP11A, ZSCAN2, DUSP28…	1686	6211	14219	1.11479
GOTERM_BP_ALL	GO:0008152~metabolic process	907	40.7457	6.66464e-05	PGAM1, MED25, RPLP2, VPRBP, RORA, MYLIP, REST, SART3, MAP3K6, USP53, ISG15, CUL7, MED28, PGAM5, MED26, CUL9, MAP3K8, RPLP1, VNN3, PIK3CG, ICOSL, C4A, BRAF, RREB1, PDPN, UGCG, MECP2, SERPING1, MED13, F7, UBE2J2, MARK4, MAPK6, MED15, JUN, MAPK8, MAPK7, CRTC2, PPP2R3A, BCL2L2, SERPINH1, VPS72, DUSP18, ARIH2, ATN1, DUSP13, DUSP14, ARG2, KLKB1, DUSP16, CASZ1, GUCY2G, ESRRA, HC, ACER2, EPM2A, ATP11A, Z…	1686	7020	14219	1.08964
GOTERM_BP_ALL	GO:0051252~regulation of RNA metabolic process	222	9.97305	0.000131732	STAT5A, REST, RORA, MXI1, HMGN5, ZGPAT, SIN3B, S1PR1, MED26, RXRA, ZFP628, ZHX2, MECP2, HMG20B, MED13, HES1, MED15, PIAS4, JUN, VEGFA, MNT, TGIF1, ST18, TXN1, SFPI1, PLAGL1, NR1H2, LIF, ATN1, HEXIM1, LHX2, ZFP811, AGRN, TCF4, NR1H3, PLAGL2, DNMT3A, ESRRA, MAML1, KLF11, CREBBP, RYBP, KLF16, SMAD3, ZSCAN2, NOTCH1, ZFHX4, CSRNP2, ETS1, RNF2, ETS2, CSRNP1, HOPX, ZFHX2, RBPJ, NCOR2, PPARD, HTATIP2, ZN…	1686	1488	14219	1.25823
GOTERM_BP_ALL	GO:0006355~regulation of transcription, DNA-dependent	218	9.79335	0.000176621	STAT5A, REST, RORA, MXI1, HMGN5, ZGPAT, SIN3B, S1PR1, MED26, RXRA, ZFP628, ZHX2, MECP2, HMG20B, MED13, HES1, MED15, PIAS4, JUN, VEGFA, MNT, TGIF1, ST18, TXN1, SFPI1, PLAGL1, NR1H2, LIF, ATN1, HEXIM1, LHX2, ZFP811, AGRN, TCF4, NR1H3, PLAGL2, DNMT3A, ESRRA, MAML1, KLF11, CREBBP, RYBP, KLF16, SMAD3, ZSCAN2, NOTCH1, ZFHX4, CSRNP2, ETS1, RNF2, ETS2, CSRNP1, HOPX, ZFHX2, RBPJ, NCOR2, PPARD, HTATIP2, ZN…	1686	1465	14219	1.25496
GOTERM_BP_ALL	GO:0006807~nitrogen compound metabolic process	419	18.823	0.00866535	SCAF1, PGD, MED25, RORA, REST, SART3, MXI1, CITED4, MED28, CTGF, MED26, SMOX, VNN3, ICOSL, NCF1, RCOR2, RREB1, RXRA, ZHX2, MECP2, HMG20B, MED13, MED15, JUN, FLII, TGIF1, ST18, CRTC2, HSPA1A, BCL2L2, HSPA1B, ATP6V0B, VPS72, ATP6V0C, HSPA1L, HEXIM1, ARG2, CASZ1, PRPF40B, TCF4, GUCY2G, ODC1, DNMT3A, ESRRA, SPHK2, KLF11, KLF16, PPFIBP2, ATP11A, ZSCAN2, ATP10A, BNIP3, DAXX, P4HA2, P4HA1, HLX, SLC22A4,…	1686	3196	14219	1.10565
GOTERM_BP_ALL	GO:0009059~macromolecule biosynthetic process	320	14.3756	0.0120063	SCAF1, EIF2C1, STAT5A, MED25, RPLP2, RORA, REST, MXI1, HMGN5, CITED4, ZGPAT, SIN3B, CRY2, MED28, CTGF, MED26, RPLP1, CRY1, FIZ1, MRPL52, RCOR2, RREB1, RXRA, ZFP628, MECP2, ZHX2, POLB, HMG20B, MED13, HES1, ZFP827, MED15, PIAS4, JUN, MNT, TGIF1, FLII, ZFP821, PELO, ST18, EXT1, CRTC2, ELL, SFPI1, SERPINH1, VPS72, NR1H2, HEXIM1, LHX2, GYS1, CASZ1, POLM, ZFP811, TCF4, NR1H3, DNMT3A, ESRRA, ZBTB46, KLF…	1686	2406	14219	1.12167
GOTERM_BP_ALL	GO:0044249~cellular biosynthetic process	390	17.5202	0.0121878	SCAF1, PTGS2, PGD, MED25, RPLP2, REST, RORA, MXI1, CITED4, MED28, CTGF, CH25H, MED26, RPLP1, NCF1, RCOR2, RREB1, RXRA, ZHX2, MECP2, HMG20B, MED13, MED15, JUN, FLII, TGIF1, PELO, ST18, CRTC2, ATP6V0B, VPS72, ATP6V0C, HEXIM1, ARG2, CASZ1, TCF4, GUCY2G, GPD2, ODC1, DNMT3A, ESRRA, SPHK2, KLF11, KLF16, ATP11A, ZSCAN2, RNPEPL1, ATP10A, DAXX, HLX, ANP32A, SPIC, HSF4, MYB, BHLHE41, SERTAD1, ZDHHC2, NFKBI…	1686	2980	14219	1.10372
GOTERM_BP_ALL	GO:0034645~cellular macromolecule biosynthetic process	318	14.2857	0.0132459	SCAF1, EIF2C1, STAT5A, MED25, RPLP2, RORA, REST, MXI1, HMGN5, CITED4, ZGPAT, SIN3B, CRY2, MED28, CTGF, MED26, RPLP1, CRY1, FIZ1, MRPL52, RCOR2, RREB1, RXRA, ZFP628, MECP2, ZHX2, POLB, HMG20B, MED13, HES1, ZFP827, MED15, PIAS4, JUN, MNT, TGIF1, FLII, ZFP821, PELO, ST18, EXT1, CRTC2, ELL, SFPI1, VPS72, NR1H2, HEXIM1, LHX2, GYS1, CASZ1, POLM, ZFP811, TCF4, NR1H3, DNMT3A, ESRRA, ZBTB46, KLF9, MAML1, …	1686	2398	14219	1.11838
GOTERM_BP_ALL	GO:0034641~cellular nitrogen compound metabolic process	404	18.1491	0.015812	SCAF1, PGD, MED25, REST, RORA, SART3, MXI1, CITED4, MED28, CTGF, MED26, SMOX, ICOSL, NCF1, RCOR2, RREB1, RXRA, ZHX2, MECP2, HMG20B, MED13, MED15, JUN, FLII, TGIF1, ST18, CRTC2, HSPA1A, BCL2L2, HSPA1B, ATP6V0B, VPS72, ATP6V0C, HSPA1L, HEXIM1, ARG2, CASZ1, PRPF40B, TCF4, GUCY2G, ODC1, DNMT3A, ESRRA, SPHK2, KLF11, KLF16, PPFIBP2, ATP11A, ZSCAN2, ATP10A, BNIP3, DAXX, HLX, SLC22A4, ANP32A, SPIC, HSF4,…	1686	3105	14219	1.09731
GOTERM_BP_ALL	GO:0009058~biosynthetic process	399	17.9245	0.0193474	SCAF1, PTGS2, PGD, MED25, RPLP2, REST, RORA, MXI1, CITED4, ACBD3, MED28, CTGF, CH25H, MED26, RPLP1, NCF1, RCOR2, RREB1, RXRA, UGCG, ZHX2, MECP2, HMG20B, MED13, MED15, JUN, FLII, TGIF1, PELO, ST18, CRTC2, SERPINH1, ATP6V0B, VPS72, ATP6V0C, HEXIM1, ARG2, CASZ1, TCF4, GUCY2G, GPD2, ODC1, DNMT3A, ESRRA, SPHK2, KLF11, KLF16, ATP11A, ZSCAN2, RNPEPL1, ATP10A, DAXX, HLX, ANP32A, SPIC, HSF4, MYB, BHLHE41,…	1686	3076	14219	1.09395
GOTERM_BP_ALL	GO:0006139~nucleobase, nucleoside, nucleotide and nucleic acid metabolic process	368	16.5319	0.0515762	SCAF1, EIF2C1, ATP1B3, STAT5A, PGD, ADCY6, MED25, RORA, PTTG1, REST, SART3, MXI1, HMGN5, CITED4, DNASE1L3, ZGPAT, SIN3B, ATP2B4, CRY2, DDX11, MED28, CTGF, NT5C3, MED26, CRY1, FIZ1, ICOSL, RCOR2, RREB1, NCF1, RXRA, ZFP628, MECP2, ZHX2, POLB, HMG20B, MED13, HES1, ZFP827, DCLRE1C, MED15, PIAS4, JUN, VEGFA, MNT, TGIF1, FLII, ZFP821, ST18, EIF2C3, CRTC2, ELL, HSPA1A, BCL2L2, SFPI1, HSPA1B, OAS2, ATP6V…	1686	2881	14219	1.07725
GOTERM_BP_ALL	GO:0010467~gene expression	327	14.69	0.0775021	SCAF1, EIF2C1, STAT5A, MED25, RPLP2, RORA, REST, SART3, MXI1, HMGN5, CITED4, ZGPAT, SIN3B, CRY2, MED28, MED26, RPLP1, FAS, CRY1, FIZ1, MRPL52, C4A, RCOR2, RREB1, RXRA, ZFP628, MECP2, ZHX2, SERPING1, HMG20B, MED13, HES1, ZFP827, MED15, PIAS4, JUN, MNT, TGIF1, FLII, ZFP821, PELO, ST18, ASPRV1, CRTC2, ELL, BCL2L2, SFPI1, SERPINH1, VPS72, NR1H2, MOV10, HEXIM1, LHX2, CASZ1, ZFP811, SNRNP35, TCF4, PRPF…	1686	2571	14219	1.07265
Annotation Cluster 6	Enrichment Score: 5.977349079524718
Category	Term	Count	%	PValue	Genes	List Total	Pop Hits	Pop Total	Fold Enrichment
GOTERM_BP_ALL	GO:0032502~developmental process	424	19.0476	2.32292e-10	PTGS2, PGF, REST, RORA, ACTG1, PGP, CUL7, CTGF, FAS, TLK2, ICOSL, ARC, PTPRF, PDPN, RXRA, MECP2, PTPRU, MARK4, BCL2L11, WDR92, PLAUR, MYO18B, JUN, FLII, TGIF1, MAPK8, ADAMTS1, MAPK7, PMP22, ASPRV1, PPT2, ACP5, HSPA1A, BCL2L2, ACP2, HSPA1B, BCL2L1, OTOR, HSPA1L, ALCAM, RAC3, HEXIM1, DNMT3L, PVRL2, VEZF1, TCF4, DVL2, ODC1, DNMT3A, DVL3, SPHK2, MAP2K1, HC, EPM2A, SPHK1, KLF11, ZSCAN2, GGN, DVL1, BCL…	1686	2743	14219	1.30362
GOTERM_BP_ALL	GO:0007275~multicellular organismal development	385	17.2956	1.08318e-08	PTGS2, PGF, REST, RORA, PGP, CUL7, CTGF, FAS, TLK2, ICOSL, ARC, PTPRF, PDPN, RXRA, MECP2, MARK4, BCL2L11, PLAUR, WDR92, MYO18B, JUN, FLII, TGIF1, ADAMTS1, MAPK8, PMP22, ASPRV1, PPT2, ACP5, BCL2L2, HSPA1A, ACP2, HSPA1B, BCL2L1, OTOR, ALCAM, HSPA1L, RAC3, HEXIM1, DNMT3L, VEZF1, TCF4, DVL2, DVL3, DNMT3A, ODC1, MAP2K1, SPHK2, HC, KLF11, SPHK1, EPM2A, ZSCAN2, GGN, DVL1, BCL2A1D, ADAP2, TGFBR3, HTATIP2…	1686	2521	14219	1.28795
GOTERM_BP_ALL	GO:0048513~organ development	270	12.1294	1.42457e-08	PTGS2, PGF, STAT5A, FST, FGFRL1, EDN1, RORA, SIN3B, PGP, S1PR1, CUL7, CTGF, INSIG1, GAB1, FAS, ARC, PDPN, RXRA, EFNB2, MECP2, VASH1, BCL2L11, PLAUR, WDR92, HES1, DCLRE1C, VEGFC, MYO18B, JUN, VEGFA, PDGFRB, TGIF1, ADAMTS1, EXT1, ASPRV1, IQCB1, CDK5R1, PPT2, ACP5, BCL2L2, SFPI1, BCL2L1, OTOR, CD74, SLC11A2, LIF, HEXIM1, TRP53BP2, LHX2, GYS1, POLM, AGRN, VEZF1, DVL2, ODC1, BMP1, MAP2K1, SPHK2, SPHK1…	1686	1663	14219	1.36925
GOTERM_BP_ALL	GO:0048856~anatomical structure development	337	15.1393	2.01005e-08	PTGS2, PDLIM7, PGF, STAT5A, FST, FGFRL1, EDN1, RORA, REST, ACTG1, PGP, SIN3B, S1PR1, CUL7, CTGF, SEMA7A, INSIG1, GAB1, GDF9, FAS, ICOSL, ARC, PTPRF, PDPN, RXRA, EFNB2, MECP2, MARK4, VASH1, BCL2L11, WDR92, PLAUR, HES1, DCLRE1C, VEGFC, MYO18B, JUN, VEGFA, PDGFRB, TGIF1, MAPK8, ADAMTS1, EXT1, PMP22, ASPRV1, IQCB1, ZFP358, CDK5R1, ACP5, PPT2, ACP2, BCL2L2, SFPI1, BCL2L1, OTOR, CD74, SLC11A2, LIF, ALC…	1686	2170	14219	1.30973
GOTERM_BP_ALL	GO:0048731~system development	318	14.2857	2.07994e-08	PTGS2, PDLIM7, PGF, STAT5A, FST, FGFRL1, EDN1, RORA, REST, PGP, SIN3B, S1PR1, CUL7, CTGF, SEMA7A, INSIG1, GAB1, FAS, ICOSL, ARC, PTPRF, PDPN, RXRA, EFNB2, MECP2, MARK4, VASH1, BCL2L11, WDR92, PLAUR, HES1, DCLRE1C, VEGFC, MYO18B, JUN, VEGFA, PDGFRB, TGIF1, MAPK8, ADAMTS1, EXT1, PMP22, ASPRV1, IQCB1, ZFP358, CDK5R1, PPT2, ACP5, ACP2, BCL2L2, SFPI1, BCL2L1, OTOR, CD74, SLC11A2, LIF, ALCAM, TRP53BP2,…	1686	2027	14219	1.32308
GOTERM_BP_ALL	GO:0009653~anatomical structure morphogenesis	176	7.90656	3.82541e-05	GNA13, PLXNA1, PGF, STAT5A, LMO4, EDN1, FST, FGFRL1, RORA, JAG1, IL10, ACTG1, PRKAR2B, PGP, S1PR1, CUL7, CTGF, INSIG1, TDGF1, IL1B, GDF9, WNT6, BCL10, SOCS3, PDPN, RELA, RXRA, EFNB2, DLL1, JUNB, VASH1, BCL2L11, NUMBL, PLAUR, WDR92, HES1, VEGFC, MYO18B, NDEL1, HIF1A, DLL4, SIX1, VEGFA, TGIF1, PDGFRB, ADAMTS1, NEURL2, EXT1, PMP22, TNFAIP2, DST, ZFP358, ZFAND5, CAV1, CDK5R1, TSHZ1, AGFG1, ADORA2A, A…	1686	1114	14219	1.33241
GOTERM_BP_ALL	GO:0030154~cell differentiation	236	10.602	4.63722e-05	PDLIM7, PTGS2, PGF, STAT5A, EDN1, REST, RORA, ACTG1, HOOK1, S1PR1, CUL7, CTGF, SEMA7A, GDF9, TLK2, FAS, RXRA, EFNB2, MECP2, PTPRU, WDR92, HES1, DCLRE1C, VEGFC, MYO18B, TXNDC2, UHRF2, JUN, VEGFA, TGIF1, MAPK7, ZFP358, CDK5R1, TDRD7, SFPI1, HSPA1A, BCL2L1, HSPA1B, CD74, ALCAM, LIF, HSPA1L, SLC11A2, RAC3, LHX2, PVRL2, POLM, AGRN, VEZF1, BMP1, MAP2K1, CREBBP, SMAD3, CELSR3, ZSCAN2, GGN, KDR, DVL1, NO…	1686	1569	14219	1.26853
GOTERM_BP_ALL	GO:0048869~cellular developmental process	244	10.9614	6.0191e-05	PDLIM7, PTGS2, PGF, STAT5A, EDN1, RORA, REST, ACTG1, HOOK1, S1PR1, CUL7, CTGF, SEMA7A, GDF9, TLK2, FAS, PDPN, RXRA, EFNB2, MECP2, PTPRU, WDR92, HES1, DCLRE1C, VEGFC, MYO18B, TXNDC2, UHRF2, JUN, VEGFA, TGIF1, MAPK7, PMP22, ZFP358, CDK5R1, TDRD7, SFPI1, HSPA1A, BCL2L1, HSPA1B, CD74, ALCAM, LIF, HSPA1L, SLC11A2, RAC3, LHX2, PVRL2, POLM, AGRN, VEZF1, BMP1, MAP2K1, CREBBP, SMAD3, CELSR3, ZSCAN2, GGN, …	1686	1636	14219	1.25782
GOTERM_BP_ALL	GO:0032501~multicellular organismal process	458	20.575	0.999344	PTGS2, PGF, RORA, REST, PGP, CUL7, CTGF, FAS, TLK2, ICOSL, ARC, PTPRF, PDPN, RXRA, MECP2, SERPING1, F7, MARK4, BCL2L11, WDR92, PLAUR, OLFR56, MYO18B, JUN, F3, RYR1, FLII, TGIF1, MAPK8, ADAMTS1, PMP22, ASPRV1, PPT2, ACP5, CACNB2, HSPA1A, BCL2L2, ACP2, HSPA1B, BCL2L1, OTOR, SERPINH1, HSPA1L, ALCAM, PROCR, RAC3, HEXIM1, KLKB1, ARG2, DNMT3L, PVRL2, OLFR1033, VEZF1, TCF4, DVL2, ODC1, DNMT3A, DVL3, SPH…	1686	4329	14219	0.892256
Annotation Cluster 7	Enrichment Score: 5.228162821807465
Category	Term	Count	%	PValue	Genes	List Total	Pop Hits	Pop Total	Fold Enrichment
GOTERM_BP_ALL	GO:0044092~negative regulation of molecular function	38	1.7071	3.37035e-07	CAV1, NFKBID, ADORA2A, NFKBIA, HSPA1A, HSPA1B, LATS1, HSPA1L, S1PR3, IRAK3, ZGPAT, NOD2, SPRY1, S1PR1, HEXIM1, ARG2, HMOX1, DUSP16, MLLT1, IL1B, SPRED3, NQO1, IRAK2, CFLAR, TNFSF4, NF1, NR4A1, NLRP3, DDIT3, SH3BP5, BCL2A1D, CDKN1A, CDKN1B, GLA, GADD45G, FABP4, JAK2, GADD45B, CLN8, GADD45A	1686	132	14219	2.42785
GOTERM_BP_ALL	GO:0045859~regulation of protein kinase activity	45	2.02156	4.54583e-06	CAV1, ADORA2A, CSF1, TLR1, EDN1, TNFSF15, LPAR2, SFN, LPAR1, LATS1, CD74, IRAK3, ZGPAT, SPRY1, ERCC6, HEXIM1, MDFIC, DUSP16, GAB1, TDGF1, MLLT1, SPRED3, IL1B, NRG1, MAPKBP1, IRAK2, SPHK2, MAP2K1, SPHK1, NF1, MUL1, DGKH, CISH, SH3BP5, CDKN1A, CDKN1B, GADD45G, CD81, ERN1, FABP4, LRP8, MTOR, GADD45B, GADD45A, HTR2A	1686	186	14219	2.04038
GOTERM_BP_ALL	GO:0051348~negative regulation of transferase activity	20	0.898473	5.02857e-06	CAV1, ADORA2A, NF1, LATS1, SH3BP5, IRAK3, ZGPAT, SPRY1, CDKN1A, CDKN1B, HEXIM1, DUSP16, GADD45G, IL1B, MLLT1, SPRED3, FABP4, GADD45B, CLN8, GADD45A	1686	53	14219	3.18248
GOTERM_BP_ALL	GO:0043549~regulation of kinase activity	45	2.02156	1.08335e-05	CAV1, ADORA2A, CSF1, TLR1, EDN1, TNFSF15, LPAR2, SFN, LPAR1, LATS1, CD74, IRAK3, ZGPAT, SPRY1, ERCC6, HEXIM1, MDFIC, DUSP16, GAB1, TDGF1, MLLT1, SPRED3, IL1B, NRG1, MAPKBP1, IRAK2, SPHK2, MAP2K1, SPHK1, NF1, MUL1, DGKH, CISH, SH3BP5, CDKN1A, CDKN1B, GADD45G, CD81, ERN1, FABP4, LRP8, MTOR, GADD45B, GADD45A, HTR2A	1686	192	14219	1.97662
GOTERM_BP_ALL	GO:0043086~negative regulation of catalytic activity	29	1.30279	1.10438e-05	CAV1, ADORA2A, HSPA1A, HSPA1B, LATS1, HSPA1L, S1PR3, ZGPAT, IRAK3, SPRY1, S1PR1, HEXIM1, ARG2, DUSP16, IL1B, SPRED3, MLLT1, NQO1, CFLAR, NF1, NR4A1, SH3BP5, BCL2A1D, CDKN1A, CDKN1B, GLA, GADD45G, FABP4, GADD45B, CLN8, GADD45A	1686	101	14219	2.42152
GOTERM_BP_ALL	GO:0006469~negative regulation of protein kinase activity	19	0.853549	1.14205e-05	CAV1, ADORA2A, NF1, LATS1, SH3BP5, IRAK3, ZGPAT, SPRY1, CDKN1A, CDKN1B, HEXIM1, DUSP16, GADD45G, IL1B, SPRED3, FABP4, MLLT1, GADD45B, GADD45A	1686	51	14219	3.14192
GOTERM_BP_ALL	GO:0033673~negative regulation of kinase activity	19	0.853549	1.14205e-05	CAV1, ADORA2A, NF1, LATS1, SH3BP5, IRAK3, ZGPAT, SPRY1, CDKN1A, CDKN1B, HEXIM1, DUSP16, GADD45G, IL1B, SPRED3, FABP4, MLLT1, GADD45B, GADD45A	1686	51	14219	3.14192
GOTERM_BP_ALL	GO:0051338~regulation of transferase activity	46	2.06649	1.24367e-05	CAV1, ADORA2A, CSF1, TLR1, EDN1, TNFSF15, LPAR2, SFN, LPAR1, LATS1, CD74, IRAK3, ZGPAT, SPRY1, ERCC6, HEXIM1, MDFIC, DUSP16, GAB1, TDGF1, MLLT1, SPRED3, IL1B, NRG1, MAPKBP1, IRAK2, SPHK2, MAP2K1, SPHK1, NF1, MUL1, DGKH, CISH, SH3BP5, CDKN1A, CDKN1B, GADD45G, CD81, ERN1, FABP4, LRP8, MTOR, GADD45B, GADD45A, CLN8, HTR2A	1686	199	14219	1.94947
Annotation Cluster 8	Enrichment Score: 5.122664565491335
Category	Term	Count	%	PValue	Genes	List Total	Pop Hits	Pop Total	Fold Enrichment
GOTERM_BP_ALL	GO:0043687~post-translational protein modification	185	8.31087	1.90778e-08	RNASEL, TBK1, STAT5A, PTPN23, CASK, LPAR2, LPAR1, LNX1, MAP3K6, PRKAR2B, CRY2, ISG15, CLK3, MDFIC, CLK4, GAB1, TDGF1, MAP3K8, STK39, TLK2, CRY1, PIK3CG, SATB1, BRAF, PTPRF, MECP2, PIM1, SOCS7, RPS6KC1, PIM3, PTPRU, UBE2J2, PIM2, WNK2, PTPRN, CDKL3, MARK4, PPP1CB, STK3, TXNDC2, UHRF2, MAPK6, PIAS4, RIOK3, NEK8, TESK1, PDGFRB, TESK2, RIPK2, MAPK8, MAPK7, HS3ST3B1, KALRN, PPP2R3A, PPME1, SSH1, STK10…	1686	1055	14219	1.47887
GOTERM_BP_ALL	GO:0006793~phosphorus metabolic process	152	6.82839	4.1353e-07	RNASEL, TBK1, STAT5A, PTPN23, CASK, LPAR2, LPAR1, MAP3K6, PRKAR2B, CLK3, MDFIC, CLK4, GAB1, TDGF1, MAP3K8, STK39, TLK2, PIK3CG, BRAF, PTPRF, PIM1, MECP2, RPS6KC1, PIM3, PTPRU, PIM2, WNK2, PTPRN, CDKL3, MARK4, PPP1CB, STK3, MAPK6, RIOK3, NEK8, TESK1, TESK2, RIPK2, PDGFRB, MAPK8, MAPK7, KALRN, PPP2R3A, SSH1, STK10, STK17B, ACP5, SRC, ATP6V0B, CD74, ATP6V0C, LIF, IRAK3, DUSP18, DUSP13, DUSP14, PTK6,…	1686	866	14219	1.48026
GOTERM_BP_ALL	GO:0006796~phosphate metabolic process	152	6.82839	4.1353e-07	RNASEL, TBK1, STAT5A, PTPN23, CASK, LPAR2, LPAR1, MAP3K6, PRKAR2B, CLK3, MDFIC, CLK4, GAB1, TDGF1, MAP3K8, STK39, TLK2, PIK3CG, BRAF, PTPRF, PIM1, MECP2, RPS6KC1, PIM3, PTPRU, PIM2, WNK2, PTPRN, CDKL3, MARK4, PPP1CB, STK3, MAPK6, RIOK3, NEK8, TESK1, TESK2, RIPK2, PDGFRB, MAPK8, MAPK7, KALRN, PPP2R3A, SSH1, STK10, STK17B, ACP5, SRC, ATP6V0B, CD74, ATP6V0C, LIF, IRAK3, DUSP18, DUSP13, DUSP14, PTK6,…	1686	866	14219	1.48026
GOTERM_BP_ALL	GO:0006464~protein modification process	205	9.20934	1.01544e-06	STAT5A, PTPN23, LPAR2, LPAR1, MAP3K6, CRY2, CLK3, ISG15, CLK4, GAB1, MAP3K8, TLK2, CRY1, PIK3CG, BRAF, PTPRF, PIM1, MECP2, PIM3, PTPRU, PIM2, WNK2, UBE2J2, PTPRN, MARK4, TXNDC2, UHRF2, PIAS4, MAPK6, NEK8, PDGFRB, MAPK8, MAPK7, HS3ST3B1, PPP2R3A, STK17B, PPT2, CD74, LIF, DUSP18, DUSP13, DUSP14, DUSP16, GUCY2G, MAP2K1, MAP2K2, EPM2A, CREBBP, PTPN13, PTPN12, ADPRH, KDR, DUSP28, CDC42BPG, RNF2, HOPX,…	1686	1260	14219	1.37213
GOTERM_BP_ALL	GO:0043412~biopolymer modification	210	9.43396	3.60163e-06	STAT5A, PTPN23, LPAR2, LPAR1, MAP3K6, CRY2, CLK3, ISG15, CLK4, GAB1, MAP3K8, TLK2, CRY1, PIK3CG, BRAF, PTPRF, PIM1, MECP2, PIM3, PTPRU, UBE2J2, PIM2, WNK2, PTPRN, MARK4, TXNDC2, UHRF2, PIAS4, MAPK6, NEK8, PDGFRB, MAPK8, MAPK7, HS3ST3B1, PPP2R3A, STK17B, PPT2, CD74, LIF, DUSP18, DUSP13, DUSP14, DUSP16, GUCY2G, DNMT3A, MAP2K1, MAP2K2, EPM2A, CREBBP, PTPN13, PTPN12, ADPRH, KDR, DUSP28, CDC42BPG, RNF…	1686	1320	14219	1.3417
GOTERM_BP_ALL	GO:0044267~cellular protein metabolic process	306	13.7466	2.15692e-05	STAT5A, PTPN23, RPLP2, VPRBP, LPAR2, DNAJB12, MYLIP, LPAR1, ZNRF1, MAP3K6, USP53, CRY2, ISG15, CLK3, CUL7, CUL9, RPLP1, MAP3K8, GAB1, CLK4, TLK2, CRY1, PIK3CG, MRPL52, PTPRF, BRAF, MECP2, UBR4, PIM1, PIM3, PTPRU, UBE2J2, WNK2, PIM2, PTPRN, MARK4, UHRF2, TXNDC2, PIAS4, MAPK6, FBXL8, NEK8, PDGFRB, MAPK8, PELO, MAPK7, HS3ST3B1, PPP2R3A, STK17B, PPT2, RFFL, CD74, LIF, DUSP18, ARIH2, DUSP13, DUSP14, D…	1686	2088	14219	1.23595
GOTERM_BP_ALL	GO:0019538~protein metabolic process	361	16.2174	0.000527478	STAT5A, PTPN23, RPLP2, VPRBP, LPAR2, DNAJB12, MYLIP, LPAR1, ZNRF1, MAP3K6, USP53, PGPEP1, CRY2, ISG15, CLK3, CUL7, HTRA1, FAP, CUL9, RPLP1, MAP3K8, GAB1, CLK4, HTRA4, TLK2, CRY1, PIK3CG, MRPL52, F10, C4A, PTPRF, BRAF, MECP2, UBR4, PIM1, PIM3, SERPING1, PTPRU, UBE2J2, WNK2, PIM2, F7, PTPRN, MARK4, UHRF2, TXNDC2, MAPK6, PIAS4, FBXL8, NEK8, PDGFRB, MAPK8, PELO, ADAMTS1, MAPK7, HS3ST3B1, ASPRV1, ADAM…	1686	2615	14219	1.16425
GOTERM_BP_ALL	GO:0016310~phosphorylation	115	5.16622	0.000582511	RNASEL, TBK1, STAT5A, CASK, LPAR2, LPAR1, MAP3K6, PRKAR2B, CLK3, MDFIC, CLK4, MAP3K8, TDGF1, GAB1, STK39, TLK2, PIK3CG, BRAF, PIM1, MECP2, RPS6KC1, PIM3, PIM2, WNK2, CDKL3, MARK4, STK3, MAPK6, RIOK3, NEK8, TESK1, TESK2, RIPK2, PDGFRB, MAPK8, MAPK7, KALRN, STK10, STK17B, ATP6V0B, CD74, SRC, ATP6V0C, LIF, IRAK3, PTK6, TCP10A, TCP10B, TCP10C, DYRK2, GUCY2G, MAP2K1, MAP2K2, MUL1, KDR, IKBKE, CDC42BPG…	1686	718	14219	1.35078
GOTERM_BP_ALL	GO:0006468~protein amino acid phosphorylation	103	4.62713	0.000995359	RNASEL, TBK1, STAT5A, CASK, LPAR2, LPAR1, PRKAR2B, MAP3K6, CLK3, MDFIC, MAP3K8, TDGF1, GAB1, CLK4, STK39, TLK2, PIK3CG, BRAF, PIM1, RPS6KC1, PIM3, PIM2, WNK2, CDKL3, MARK4, STK3, MAPK6, RIOK3, TESK1, NEK8, TESK2, RIPK2, PDGFRB, MAPK8, MAPK7, KALRN, STK10, STK17B, CD74, SRC, LIF, IRAK3, PTK6, TCP10A, TCP10B, TCP10C, DYRK2, GUCY2G, MAP2K1, MAP2K2, MUL1, KDR, IKBKE, CDC42BPG, PLK3, PLK2, ULK1, DYRK1…	1686	640	14219	1.35728
Annotation Cluster 9	Enrichment Score: 5.028365292742519
Category	Term	Count	%	PValue	Genes	List Total	Pop Hits	Pop Total	Fold Enrichment
GOTERM_BP_ALL	GO:0001817~regulation of cytokine production	44	1.97664	1.45593e-09	TNF, ADORA2B, TBK1, LRRC32, STAT5A, TLR1, NFKB1, TLR7, IL10, S1PR3, IRAK3, NOD2, NOD1, REL, HMOX1, RNF128, TICAM1, TICAM2, BCL3, IL1B, FCER1G, BCL6, TRAF6, LTB, LAG3, IL1A, SRGN, BCL10, ICOSL, IL6, TNFSF4, CEBPB, RELA, SPHK1, H2-Q1, IDO1, CD40, H2-Q6, NLRP3, H2-Q7, H2-Q8, H2-Q9, DDX58, CD83, IL20RB, RIPK2, IRF4, CD14	1686	139	14219	2.66962
GOTERM_BP_ALL	GO:0001819~positive regulation of cytokine production	19	0.853549	0.000210993	TNF, ADORA2B, H2-Q1, CD40, IDO1, NLRP3, H2-Q6, TLR7, H2-Q7, H2-Q8, H2-Q9, DDX58, CD83, NOD2, NOD1, IL20RB, TICAM1, FCER1G, IL1B, RIPK2, BCL3, CD14, IL1A	1686	62	14219	2.58448
GOTERM_BP_ALL	GO:0051240~positive regulation of multicellular organismal process	33	1.48248	0.00267606	CAV1, TNF, ADORA2B, ADORA2A, CSF1, STAT5A, EDN1, FST, TPM1, TLR7, NOD2, NOD1, TICAM1, BCL3, IL1B, FCER1G, LTB, IL1A, LTA, H2-Q1, MECP2, IDO1, CD40, H2-Q6, NLRP3, H2-Q7, NFKBIL1, H2-Q8, H2-Q9, DDX58, CD83, IL20RB, RIPK2, ADRA1A, CHRNB2, CD14, HTR2A	1686	163	14219	1.70741
Annotation Cluster 10	Enrichment Score: 4.772986320700959
Category	Term	Count	%	PValue	Genes	List Total	Pop Hits	Pop Total	Fold Enrichment
GOTERM_BP_ALL	GO:0001944~vasculature development	56	2.51572	3.44314e-06	GNA13, ACVRL1, HTATIP2, PGF, EDN1, GJA1, PTEN, S1PR1, CUL7, CTGF, CXCR4, HMOX1, TDGF1, RHOB, IL1B, SEMA3C, ANGPT1, NOS2, SOCS3, PDPN, EFNB2, ARHGAP24, MMP14, JUNB, VASH1, VEGFC, MYO18B, HIF1A, ZMIZ1, DLL4, VEGFA, TNFAIP2, ZFAND5, CAV1, TIPARP, SRF, PLCD3, ZC3H12A, VEZF1, PLXND1, PPAP2B, SPHK2, MAP2K1, EPAS1, VHL, SPHK1, NF1, FZD5, KDR, NOTCH1, JMJD6, ITGA7, TGFBR3, HBEGF, RBPJ, RBM15	1686	250	14219	1.88912
GOTERM_BP_ALL	GO:0048514~blood vessel morphogenesis	46	2.06649	1.08461e-05	GNA13, CAV1, ACVRL1, HTATIP2, PGF, TIPARP, EDN1, GJA1, SRF, PTEN, S1PR1, CUL7, CTGF, CXCR4, HMOX1, TDGF1, PLCD3, SEMA3C, ZC3H12A, IL1B, RHOB, ANGPT1, NOS2, VEZF1, PLXND1, EPAS1, VHL, NF1, ARHGAP24, MMP14, FZD5, JUNB, VASH1, KDR, VEGFC, NOTCH1, MYO18B, HIF1A, DLL4, ZMIZ1, ITGA7, VEGFA, HBEGF, RBPJ, RBM15, TNFAIP2	1686	198	14219	1.95931
GOTERM_BP_ALL	GO:0001568~blood vessel development	53	2.38095	1.62143e-05	GNA13, ACVRL1, HTATIP2, PGF, EDN1, GJA1, PTEN, S1PR1, CUL7, CTGF, CXCR4, HMOX1, TDGF1, RHOB, IL1B, SEMA3C, ANGPT1, NOS2, SOCS3, ARHGAP24, MMP14, JUNB, VASH1, VEGFC, MYO18B, HIF1A, ZMIZ1, DLL4, VEGFA, TNFAIP2, CAV1, TIPARP, SRF, PLCD3, ZC3H12A, VEZF1, PLXND1, PPAP2B, SPHK2, MAP2K1, EPAS1, VHL, SPHK1, NF1, FZD5, KDR, NOTCH1, JMJD6, ITGA7, HBEGF, TGFBR3, RBPJ, RBM15	1686	244	14219	1.83188
GOTERM_BP_ALL	GO:0001525~angiogenesis	34	1.5274	2.44254e-05	GNA13, ACVRL1, HTATIP2, PGF, EDN1, PTEN, SRF, S1PR1, CTGF, CXCR4, HMOX1, PLCD3, IL1B, ZC3H12A, RHOB, ANGPT1, VEZF1, PLXND1, EPAS1, VHL, ARHGAP24, MMP14, FZD5, VASH1, KDR, VEGFC, NOTCH1, HIF1A, DLL4, VEGFA, HBEGF, RBPJ, RBM15, TNFAIP2	1686	133	14219	2.15595
GOTERM_BP_ALL	GO:0048646~anatomical structure formation involved in morphogenesis	69	3.09973	9.22788e-05	GNA13, ACVRL1, HTATIP2, PGF, LMO4, MYBPC3, EDN1, RORA, PTEN, ACTG1, S1PR1, CXCR4, CTGF, HMOX1, IL1B, RHOB, ANGPT1, MYB, BCL10, EGR2, DLL1, ARHGAP24, MMP14, JUNB, MIXL1, VASP, VASH1, BCL2L11, VEGFC, HIF1A, ADM, DLL4, VEGFA, TGIF1, ADAMTS1, TXNRD1, PMP22, NEURL2, TNFAIP2, TCAP, AGFG1, EGLN1, SRF, PLCD3, ZC3H12A, SKIL, VEZF1, TRAF6, PLXND1, DVL2, EPAS1, VHL, SMAD3, NR4A3, FZD5, KDR, NOTCH1, NEB, ULK…	1686	365	14219	1.59429
Mutually repressed by M1 activation (2644 genes, p<0.05, FDR<0.05, |F.C.|>1.5)
Annotation Cluster 1	Enrichment Score: 22.50788044877112
Category	Term	Count	%	PValue	Genes	List Total	Pop Hits	Pop Total	Fold Enrichment
GOTERM_BP_ALL	GO:0007049~cell cycle	182	7.41042	2.50411e-28	ADCY3, KIFC1, CEP72, RAD51C, S100A6, PRC1, RASL2-9, KNTC1, AURKA, AURKB, CD2AP, RCBTB1, CDCA8, OIP5, CDKN2C, CDCA2, STAG3, PMS2, NUP37, CCNA2, CDCA5, ASPM, CDCA3, ANAPC5, SGOL2, LIG1, SGOL1, SKP2, ESPL1, TOPBP1, PLK1S1, TACC3, NCAPD3, TACC1, ESCO2, NCAPD2, UHRF1, SPAG5, CNTROB, TBRG1, NEK9, STMN1, NUP43, DSCC1, NEK2, TIPIN, NEDD9, CHEK1, ANLN, CHEK2, RCC1, CCNG1, SESN1, SPC24, SPC25, CDC123, TFDP…	1865	611	14219	2.27102
GOTERM_BP_ALL	GO:0022402~cell cycle process	133	5.41531	1.85664e-26	ADCY3, KIFC1, RAD51C, CEP72, RASL2-9, KNTC1, AURKB, CD2AP, CDCA8, OIP5, CDCA2, STAG3, PMS2, NUP37, CCNA2, CDCA5, ASPM, CDCA3, ANAPC5, SGOL2, SGOL1, SKP2, ESPL1, TOPBP1, PLK1S1, TACC3, NCAPD3, NCAPD2, SPAG5, CNTROB, TBRG1, NEK9, STMN1, NUP43, NEK2, TIPIN, NEDD9, CHEK1, ANLN, RCC1, CCNG1, SESN1, SPC24, SPC25, CDC123, MNS1, FBXO5, SKA1, LFNG, HELLS, ERCC6L, NUF2, CDC23, BRCA2, NDC80, CDC20, BRCA1, S…	1865	393	14219	2.58018
GOTERM_BP_ALL	GO:0022403~cell cycle phase	118	4.80456	3.97956e-26	ADCY3, KIFC1, RAD51C, RASL2-9, KNTC1, AURKB, CD2AP, CDCA8, OIP5, CDCA2, STAG3, PMS2, NUP37, CDCA5, CCNA2, ASPM, CDCA3, ANAPC5, SGOL2, SGOL1, SKP2, ESPL1, TOPBP1, TACC3, NCAPD3, NCAPD2, SPAG5, NEK9, STMN1, NUP43, NEK2, TIPIN, NEDD9, CHEK1, ANLN, RCC1, CCNG1, SPC24, SPC25, CDC123, FBXO5, MNS1, SKA1, LFNG, HELLS, ERCC6L, NUF2, BRCA2, CDC23, NDC80, CDC20, SUV39H2, NEDD1, PLK1, MAD1L1, E2F6, MLH1, MLH…	1865	328	14219	2.74283
GOTERM_BP_ALL	GO:0000279~M phase	106	4.31596	4.01153e-25	ADCY3, KIFC1, RAD51C, RASL2-9, KNTC1, AURKB, CD2AP, CDCA8, OIP5, CDCA2, STAG3, PMS2, NUP37, CDCA5, CCNA2, ASPM, CDCA3, ANAPC5, SGOL2, SGOL1, TOPBP1, ESPL1, TACC3, NCAPD3, NCAPD2, SPAG5, NEK9, STMN1, NUP43, NEK2, TIPIN, NEDD9, ANLN, RCC1, CCNG1, SPC24, SPC25, FBXO5, MNS1, SKA1, LFNG, HELLS, ERCC6L, NUF2, BRCA2, CDC23, NDC80, CDC20, SUV39H2, NEDD1, PLK1, MAD1L1, MLH1, MLH3, FAM83D, PSMC3IP, FANCA, …	1865	283	14219	2.85568
GOTERM_BP_ALL	GO:0000278~mitotic cell cycle	96	3.90879	1.23992e-24	KIFC1, MAD1L1, E2F6, RASL2-9, KNTC1, AURKA, AURKB, CD2AP, FAM83D, CDCA8, OIP5, MTBP, CDCA2, NUP37, CDCA5, CCNA2, CABLES1, TUBB3, ASPM, CDCA3, CDC6, CDK1, KIF11, ANAPC5, DSN1, SGOL1, SKP2, NUSAP1, RB1, HMGA2, UBE2C, CDK2, NCAPD3, NCAPD2, CCND1, SPAG5, NSL1, NEK9, BUB1B, HAUS7, STMN1, NUP43, MAPRE3, HAUS4, HAUS5, NEK2, CAMK2G, HAUS2, HAUS1, CETN3, POLA1, TIPIN, CETN2, NEDD9, CHEK1, ANLN, CEP55, RCC…	1865	244	14219	2.99966
GOTERM_BP_ALL	GO:0000087~M phase of mitotic cell cycle	82	3.33876	1.67836e-23	KIFC1, MAD1L1, RASL2-9, KNTC1, AURKB, CD2AP, FAM83D, CDCA8, OIP5, CDCA2, NUP37, CDCA5, CCNA2, TUBB3, ASPM, CDCA3, CDC6, CDK1, KIF11, ANAPC5, DSN1, SGOL1, NUSAP1, HMGA2, UBE2C, CDK2, NCAPD3, NCAPD2, SPAG5, NSL1, NEK9, BUB1B, HAUS7, MAPRE3, NUP43, HAUS4, HAUS5, NEK2, HAUS2, HAUS1, CETN3, TIPIN, CETN2, NEDD9, ANLN, CEP55, RCC1, CCNG1, SPC24, SPC25, NCAPH, BUB1, FBXO5, SKA1, ZWILCH, LMLN, HELLS, TERF…	1865	194	14219	3.22257
GOTERM_BP_ALL	GO:0000280~nuclear division	80	3.25733	8.13092e-23	KIFC1, MAD1L1, RASL2-9, KNTC1, AURKB, CD2AP, FAM83D, CDCA8, OIP5, CDCA2, NUP37, CDCA5, CCNA2, TUBB3, ASPM, CDCA3, CDC6, CDK1, KIF11, ANAPC5, DSN1, SGOL1, NUSAP1, HMGA2, UBE2C, CDK2, NCAPD3, NCAPD2, SPAG5, NSL1, NEK9, BUB1B, HAUS7, MAPRE3, NUP43, HAUS4, HAUS5, NEK2, HAUS2, HAUS1, CETN3, TIPIN, CETN2, NEDD9, ANLN, CEP55, RCC1, CCNG1, SPC24, SPC25, NCAPH, BUB1, FBXO5, SKA1, ZWILCH, LMLN, HELLS, TERF…	1865	190	14219	3.21016
GOTERM_BP_ALL	GO:0007067~mitosis	80	3.25733	8.13092e-23	KIFC1, MAD1L1, RASL2-9, KNTC1, AURKB, CD2AP, FAM83D, CDCA8, OIP5, CDCA2, NUP37, CDCA5, CCNA2, TUBB3, ASPM, CDCA3, CDC6, CDK1, KIF11, ANAPC5, DSN1, SGOL1, NUSAP1, HMGA2, UBE2C, CDK2, NCAPD3, NCAPD2, SPAG5, NSL1, NEK9, BUB1B, HAUS7, MAPRE3, NUP43, HAUS4, HAUS5, NEK2, HAUS2, HAUS1, CETN3, TIPIN, CETN2, NEDD9, ANLN, CEP55, RCC1, CCNG1, SPC24, SPC25, NCAPH, BUB1, FBXO5, SKA1, ZWILCH, LMLN, HELLS, TERF…	1865	190	14219	3.21016
GOTERM_BP_ALL	GO:0048285~organelle fission	80	3.25733	1.21996e-21	KIFC1, MAD1L1, RASL2-9, KNTC1, AURKB, CD2AP, FAM83D, CDCA8, OIP5, CDCA2, NUP37, CDCA5, CCNA2, TUBB3, ASPM, CDCA3, CDC6, CDK1, KIF11, ANAPC5, DSN1, SGOL1, NUSAP1, HMGA2, UBE2C, CDK2, NCAPD3, NCAPD2, SPAG5, NSL1, NEK9, BUB1B, HAUS7, MAPRE3, NUP43, HAUS4, HAUS5, NEK2, HAUS2, HAUS1, CETN3, TIPIN, CETN2, NEDD9, ANLN, CEP55, RCC1, CCNG1, SPC24, SPC25, NCAPH, BUB1, FBXO5, SKA1, ZWILCH, LMLN, HELLS, TERF…	1865	197	14219	3.09609
GOTERM_BP_ALL	GO:0051301~cell division	98	3.99023	1.06917e-20	KIFC1, MAD1L1, PRC1, RASL2-9, KNTC1, AURKB, CD2AP, FAM83D, CCNE2, CDCA8, CDC45, CDCA7, OIP5, CDCA2, NUP37, TOP2A, CCNA2, CDCA5, CABLES1, ASPM, CDCA3, CDC7, CDK1, CDC6, KIF11, ANAPC5, DSN1, SGOL2, LIG1, SGOL1, NUSAP1, RB1, HMGA2, UBE2C, CDK2, MCM5, NCAPD3, TACC1, NCAPD2, CCND1, SPAG5, TIAL1, NSL1, CNTROB, BUB1B, NEK9, HAUS7, MAPRE3, NUP43, HAUS4, CKS1B, HAUS5, NEK2, HAUS2, HAUS1, CETN3, TIPIN, NED…	1865	281	14219	2.65895
GOTERM_BP_ALL	GO:0006996~organelle organization	225	9.16124	1.94464e-13	KIFC1, RAD51C, S100A9, RASL2-9, HIRA, AURKB, CD2AP, KIFC3, CDCA8, H2AFV, CDCA2, STAG3, NUP37, MRPL39, CCNA2, CDCA5, CDCA3, ANAPC5, ESPL1, NCAPD3, NCAPD2, SUV420H2, SPAG5, CNTROB, PEX26, NEK9, NUP43, EIF2AK3, TPPP3, PALM, NEK2, PPT1, RCC1, SDHAF1, GORASP1, FBXO5, ZMPSTE24, SKA1, HIP1, SMYD3, NUF2, CDC23, CDC20, NDC80, RAD54L, NOLC1, EPS8, PTCD2, CDC42BPA, PARP1, RERE, MYO7A, EZH2, NAP1L1, POT1A, M…	1865	1078	14219	1.59131
Annotation Cluster 2	Enrichment Score: 12.982086956929518
Category	Term	Count	%	PValue	Genes	List Total	Pop Hits	Pop Total	Fold Enrichment
GOTERM_BP_ALL	GO:0006259~DNA metabolic process	134	5.45603	7.87923e-24	RAD51C, FHIT, XRCC3, XRCC2, PDGFB, XRCC6, MCM10, DNASE1L1, PRIM1, MUTYH, PRIM2, PMS2, PMS1, POLK, POLI, NUDT1, POLH, DFFA, DTL, NEIL3, DFFB, LIG1, POLE, NEIL1, TOPBP1, EEPD1, ESCO2, RFC5, RAD1, UHRF1, RFC4, RFC1, TBRG1, DSCC1, HMGB2, BLM, HUS1, TIPIN, CHEK1, PPT1, TTC5, TK1, POLE2, POLQ, NTHL1, HELLS, TRPC2, GINS1, RECQL4, PHB, GINS3, EME1, BRIP1, BRCA2, RAD54L, BRCA1, ATM, DNA2, POLD1, PCNA, DNM…	1865	421	14219	2.42668
GOTERM_BP_ALL	GO:0006281~DNA repair	80	3.25733	5.50049e-18	CLSPN, KIF22, XRCC3, XRCC2, FAM175A, XRCC6, MLH1, MLH3, FANCL, FANCM, MUTYH, SLK, FANCI, PMS2, POLG2, FANCG, FANCA, PMS1, FANCB, POLK, POLI, NUDT1, POLH, GEN1, NEIL3, LIG1, POLE, NEIL1, MBD4, TOPBP1, ESCO2, EEPD1, RAD50, RAD51, RAD1, EYA4, UHRF1, EYA1, FANCD2, HMGB2, APEX2, BLM, UNG, MGMT, HUS1, POLA1, PRKDC, CHEK1, TTC5, RPA1, PRPF19, ERCC8, CHD1L, MDC1, POLQ, NTHL1, APEX1, FEN1, EXO1, TRPC2, SS…	1865	222	14219	2.74743
GOTERM_BP_ALL	GO:0006974~response to DNA damage stimulus	94	3.82736	7.82195e-18	CLSPN, KIF22, XRCC3, XRCC2, FAM175A, ZMAT3, XRCC6, MLH1, MLH3, FANCL, FANCM, TRIAP1, MUTYH, SLK, FANCI, PMS2, FANCG, POLG2, FANCA, PMS1, FANCB, CIB1, POLK, CDK1, POLI, NUDT1, POLH, DTL, GEN1, NEIL3, LIG1, POLE, NEIL1, MBD4, TOPBP1, ESCO2, EEPD1, RAD50, RAD51, RAD1, EYA4, UHRF1, EYA1, CCND1, FANCD2, PTPRV, HMGB2, APEX2, BLM, UNG, MGMT, HUS1, POLA1, TIPIN, PRKDC, CHEK1, CHEK2, TTC5, RPA1, PRPF19, E…	1865	287	14219	2.4971
GOTERM_BP_ALL	GO:0033554~cellular response to stress	111	4.51954	1.36285e-14	XRCC3, XRCC2, XRCC6, TIRAP, MUTYH, PMS2, PMS1, CIB1, POLK, ATG9B, POLI, NUDT1, POLH, DTL, NEIL3, LIG1, POLE, NEIL1, TOPBP1, EEPD1, ESCO2, RAD1, UHRF1, PTPRV, EIF2AK3, HMGB2, BLM, HUS1, TIPIN, ST8SIA1, HFE, CHEK1, CHEK2, TTC5, DUSP19, LAMB2, POLQ, NTHL1, FGD4, TRPC2, EME1, BRIP1, BRCA2, ATAD5, RAD54L, BRCA1, ATM, DNA2, POLD1, PCNA, FBXO31, RAD54B, PARP1, CHAF1A, CHAF1B, CLSPN, KIF22, FAM175A, ZMAT…	1865	404	14219	2.09475
GOTERM_BP_ALL	GO:0051716~cellular response to stimulus	135	5.49674	4.89865e-13	XRCC3, XRCC2, IL16, S100A9, XRCC6, TIRAP, SLC2A8, MUTYH, PMS2, EIF2B3, INSR, PMS1, CIB1, POLK, ATG9B, POLI, NUDT1, POLH, DTL, NEIL3, LIG1, POLE, NEIL1, TOPBP1, EEPD1, ESCO2, RAD1, UHRF1, ARRB1, PTPRV, CX3CR1, EIF2AK3, HMGB2, BLM, HUS1, TIPIN, ST8SIA1, HFE, CHEK1, CHEK2, TTC5, AHRR, DUSP19, LAMB2, PRKRA, POLQ, NTHL1, FGD4, TRPC2, EME1, BRIP1, BRCA2, ATAD5, RAD54L, USF1, BRCA1, ATM, FCGR3, DNA2, P2…	1865	556	14219	1.85118
GOTERM_BP_ALL	GO:0006950~response to stress	212	8.63192	8.38723e-07	XRCC3, ADORA3, XRCC2, XRCC6, PTGS1, CFH, CREB3L2, CREB3L1, LUC7L3, RAB27A, GNG7, POLK, PLD1, TNIK, POLI, POLH, GATM, CRYAB, LIG1, POLE, F9, IFI47, ESCO2, EEPD1, RAD1, UHRF1, F5, PTPRV, CCR2, TFPI, EIF2AK3, HUS1, HFE, CHEK1, CHEK2, DUSP19, LAMB2, IDH2, IDH1, POLQ, NTHL1, TRPC2, EME1, CHI3L3, RAD54L, ATM, FCGR3, GGT5, PCNA, RAD54B, CLEC7A, CHAF1A, PARP1, TREML1, CHAF1B, PLAU, CLSPN, IL27RA, LY86, Z…	1865	1184	14219	1.36513
GOTERM_BP_ALL	GO:0050896~response to stimulus	343	13.9658	0.0703151	ADCY3, S100A4, GDF3, XRCC3, ADORA3, XRCC2, S100A8, CADM1, PTGS1, XRCC6, S100A9, H60B, AGPS, CREB3L2, CFH, ERAP1, CREB3L1, EIF2B3, LUC7L3, GNG7, RAB27A, GBP8, POLK, PLD1, POLI, TNIK, GATM, POLH, CRYAB, LIG1, POLE, GBP9, IFI47, F9, COLEC12, ESCO2, EEPD1, RAD1, UHRF1, GLUL, AAAS, F5, PTPRV, CCR2, CX3CR1, TFPI, CLEC5A, EIF2AK3, FV1, HUS1, HFE, CHEK1, PPT1, FCGRT, CHEK2, ADA, EPHB2, AHRR, DUSP19, LAMB…	1865	2437	14219	1.07307
Annotation Cluster 3	Enrichment Score: 8.809193325400342
Category	Term	Count	%	PValue	Genes	List Total	Pop Hits	Pop Total	Fold Enrichment
GOTERM_BP_ALL	GO:0042180~cellular ketone metabolic process	124	5.04886	2.64494e-13	TARS2, CTPS, EHHADH, F13A1, PTGS1, ALDH1L2, FAH, GOT2, PECR, IDH3G, ATG7, ELOVL7, ELOVL6, ENOPH1, HADH, NANP, ACAA2, YARS, PLD1, GATM, CMAS, GLUL, CROT, PRODH, MDH1, HACL1, GNE, GLUD1, CTPS2, KARS, G6PC3, HADHB, IDH2, IDH1, GCSH, ASRGL1, FH1, RARS2, GARS, MTHFSD, DLAT, CRAT, AARSD1, BRCA1, GGT5, MLYCD, MTR, CARS2, THNSL1, FPGS, CACNA1A, ACOX1, BCKDK, AMT, PRKAG2, CAD, LTC4S, PSPH, ACSF3, ACSF2, A…	1865	491	14219	1.92544
GOTERM_BP_ALL	GO:0043436~oxoacid metabolic process	121	4.92671	5.25016e-13	TARS2, CTPS, EHHADH, F13A1, PTGS1, ALDH1L2, FAH, GOT2, PECR, IDH3G, ATG7, ELOVL7, ELOVL6, ENOPH1, HADH, NANP, ACAA2, YARS, PLD1, GATM, CMAS, GLUL, CROT, PRODH, MDH1, HACL1, GNE, GLUD1, CTPS2, KARS, G6PC3, HADHB, IDH2, IDH1, GCSH, ASRGL1, FH1, RARS2, GARS, MTHFSD, DLAT, CRAT, AARSD1, BRCA1, GGT5, MLYCD, MTR, CARS2, THNSL1, FPGS, CACNA1A, ACOX1, BCKDK, AMT, PRKAG2, CAD, LTC4S, PSPH, ACSF3, ACSF2, A…	1865	479	14219	1.92593
GOTERM_BP_ALL	GO:0019752~carboxylic acid metabolic process	121	4.92671	5.25016e-13	TARS2, CTPS, EHHADH, F13A1, PTGS1, ALDH1L2, FAH, GOT2, PECR, IDH3G, ATG7, ELOVL7, ELOVL6, ENOPH1, HADH, NANP, ACAA2, YARS, PLD1, GATM, CMAS, GLUL, CROT, PRODH, MDH1, HACL1, GNE, GLUD1, CTPS2, KARS, G6PC3, HADHB, IDH2, IDH1, GCSH, ASRGL1, FH1, RARS2, GARS, MTHFSD, DLAT, CRAT, AARSD1, BRCA1, GGT5, MLYCD, MTR, CARS2, THNSL1, FPGS, CACNA1A, ACOX1, BCKDK, AMT, PRKAG2, CAD, LTC4S, PSPH, ACSF3, ACSF2, A…	1865	479	14219	1.92593
GOTERM_BP_ALL	GO:0006082~organic acid metabolic process	121	4.92671	6.08616e-13	TARS2, CTPS, EHHADH, F13A1, PTGS1, ALDH1L2, FAH, GOT2, PECR, IDH3G, ATG7, ELOVL7, ELOVL6, ENOPH1, HADH, NANP, ACAA2, YARS, PLD1, GATM, CMAS, GLUL, CROT, PRODH, MDH1, HACL1, GNE, GLUD1, CTPS2, KARS, G6PC3, HADHB, IDH2, IDH1, GCSH, ASRGL1, FH1, RARS2, GARS, MTHFSD, DLAT, CRAT, AARSD1, BRCA1, GGT5, MLYCD, MTR, CARS2, THNSL1, FPGS, CACNA1A, ACOX1, BCKDK, AMT, PRKAG2, CAD, LTC4S, PSPH, ACSF3, ACSF2, A…	1865	480	14219	1.92192
GOTERM_BP_ALL	GO:0006519~cellular amino acid and derivative metabolic process	79	3.21661	6.56588e-10	BCKDK, TARS2, SNCAIP, OCLN, HPRT, CTPS, F13A1, AMT, SAT2, CAD, PSPH, OTUB2, FAH, GOT2, MTHFD1, WARS, ATG7, GPX3, GSTZ1, ACAD8, POLG2, ENOPH1, TARSL2, MRI1, CLN3, YARS, ACADM, PCYOX1L, GATM, PADI2, PNPLA7, GLUL, FARSB, PCYOX1, EIF5A2, ALDH9A1, PRODH, PYCRL, ALDH18A1, BCAT2, SRM, GLUD1, NFS1, ASNS, CTPS2, VARS, PFAS, KARS, IARS, LY6E, GSTK1, LARS, PEMT, IDH1, ASRGL1, MARS2, GCSH, PCYT1A, MARS, SHMT…	1865	297	14219	2.02797
GOTERM_BP_ALL	GO:0009308~amine metabolic process	81	3.29805	4.81289e-08	BCKDK, TARS2, SNCAIP, HPRT, CTPS, NDST2, HEXA, F13A1, AMT, HEXB, SAT2, PGLYRP1, CAD, PSPH, FAH, GOT2, MTHFD1, WARS, ATG7, GSTZ1, ACAD8, POLG2, ENOPH1, TARSL2, CTBS, MRI1, CLN3, YARS, ACADM, GATM, PADI2, GLCE, PNPLA7, GLUL, FARSB, CHSY1, ALDH9A1, PRODH, CLN6, PYCRL, ALDH18A1, BCAT2, SRM, MAMDC2, GLUD1, NFS1, ASNS, CTPS2, VARS, PFAS, KARS, IARS, B3GNT8, LY6E, LARS, PEMT, ASRGL1, MARS2, GCSH, PCYT1A…	1865	336	14219	1.83796
GOTERM_BP_ALL	GO:0044106~cellular amine metabolic process	66	2.6873	7.01521e-08	BCKDK, SNCAIP, TARS2, HPRT, CTPS, F13A1, AMT, SAT2, CAD, PSPH, FAH, GOT2, MTHFD1, WARS, ATG7, GSTZ1, ACAD8, POLG2, ENOPH1, TARSL2, MRI1, CLN3, YARS, ACADM, PADI2, PNPLA7, GLUL, FARSB, ALDH9A1, PRODH, PYCRL, ALDH18A1, BCAT2, SRM, GLUD1, NFS1, ASNS, CTPS2, VARS, PFAS, KARS, IARS, LY6E, PEMT, LARS, ASRGL1, MARS2, GCSH, PCYT1A, MARS, SHMT1, PAOX, SHMT2, RARS2, MAOA, GARS, PARK2, AARSD1, ADI1, FRRS1, …	1865	256	14219	1.9656
GOTERM_BP_ALL	GO:0006520~cellular amino acid metabolic process	53	2.15798	1.33281e-07	BCKDK, TARS2, CTPS, F13A1, AMT, CAD, PSPH, FAH, MTHFD1, GOT2, WARS, ATG7, GSTZ1, ACAD8, POLG2, ENOPH1, TARSL2, MRI1, CLN3, YARS, PADI2, GLUL, FARSB, PRODH, PYCRL, ALDH18A1, BCAT2, GLUD1, NFS1, ASNS, CTPS2, VARS, PFAS, KARS, IARS, LARS, MARS2, ASRGL1, GCSH, MARS, SHMT1, SHMT2, RARS2, GARS, AARSD1, ADI1, FRRS1, MTR, PHGDH, CARS2, THNSL1, HIBCH, CACNA1A	1865	191	14219	2.1156
GOTERM_BP_ALL	GO:0032787~monocarboxylic acid metabolic process	59	2.40228	6.63809e-05	ACOX1, EHHADH, PRKAG2, PTGS1, LTC4S, ALDH1L2, ACSF3, ACSF2, ACN9, SC4MOL, MTHFD1, FAR1, PECR, CRYL1, CYP39A1, UGT1A7C, ACOT11, ELOVL7, ELOVL6, HADH, AASDH, ACAA2, ACADM, DHRS9, ANKRD23, H2-KE6, GPAM, ALDH9A1, RNPEP, CROT, MYO5A, HACL1, ECH1, ECHS1, G6PC3, HADHB, ALOX5AP, IDH2, IDH1, HSD17B4, HPGDS, PLA2G15, TBXAS1, FADS1, MTHFSD, FADS2, CRAT, DLAT, PCK2, BRCA1, CPT1A, GGT5, MLYCD, MAPK14, MTR, LT…	1865	268	14219	1.67845
GOTERM_BP_ALL	GO:0006631~fatty acid metabolic process	44	1.79153	9.29845e-05	MYO5A, HACL1, ACOX1, ECH1, EHHADH, PRKAG2, PTGS1, ECHS1, LTC4S, ACSF3, ACSF2, HADHB, SC4MOL, FAR1, PECR, CRYL1, ALOX5AP, ACOT11, ELOVL7, ELOVL6, HSD17B4, HADH, HPGDS, AASDH, ACAA2, PLA2G15, ACADM, TBXAS1, FADS1, FADS2, CRAT, CPT1A, BRCA1, GGT5, ANKRD23, MLYCD, MAPK14, LTA4H, H2-KE6, HPGD, GPAM, CROT, RNPEP, MGST2	1865	184	14219	1.82316
Annotation Cluster 4	Enrichment Score: 6.70761232039053
Category	Term	Count	%	PValue	Genes	List Total	Pop Hits	Pop Total	Fold Enrichment
GOTERM_BP_ALL	GO:0006629~lipid metabolic process	143	5.82248	2.41692e-08	GBGT1, EHHADH, PTGS1, FDFT1, PECR, AGPS, SULT1A1, ELOVL7, ELOVL6, HADH, ACAA2, CRLS1, PLD1, CMAS, PLD4, PCTP, TECR, PNPLA7, EBPL, ACAP1, CROT, HSD17B11, HACL1, GNE, ST8SIA1, APOC2, ABCA2, PPT1, HADHB, DAGLA, B3GNT5, PEMT, GALC, SCARB1, PCYT1A, PCYT1B, B4GALT6, LPL, GLT25D1, OSBPL9, FDPS, ALMS1, CRAT, DAGLB, BRCA1, GGT5, P2RX7, ISPD, MLYCD, PLCG2, ACAD11, PIP4K2A, IDI1, TM7SF2, ACOX1, CYB5R1, NAAA…	1865	696	14219	1.56645
GOTERM_BP_ALL	GO:0008610~lipid biosynthetic process	72	2.9316	4.04253e-08	TM7SF2, CYB5R1, HEXB, PRKAG2, PTGS1, LTC4S, PMVK, FDFT1, SC4MOL, FAR1, PIGK, PECR, CYP39A1, PIGF, AGPS, ANG, AGPAT9, PIGB, GNPAT, ELOVL7, ELOVL6, PCYT2, DHCR24, PGAP3, CRLS1, PLD1, PIGZ, LPGAT1, CMAS, PIGX, DHRS9, PIGS, SIGMAR1, TECR, COQ2, H2-KE6, GPAM, RNPEP, MYO5A, HSD17B11, CYP51, GNE, HSD3B7, ST8SIA1, PRPF19, B3GNT5, DHCR7, ALOX5AP, PEMT, SCARB1, PCYT1A, PCYT1B, B4GALT6, HPGDS, HSD17B7, B4GA…	1865	285	14219	1.9261
GOTERM_BP_ALL	GO:0044255~cellular lipid metabolic process	98	3.99023	7.71344e-06	GBGT1, EHHADH, PTGS1, FDFT1, PECR, ELOVL7, ELOVL6, HADH, ACAA2, PLD1, CRLS1, CMAS, PNPLA7, CROT, HACL1, GNE, ST8SIA1, HADHB, B3GNT5, PEMT, GALC, PCYT1A, PCYT1B, B4GALT6, LPL, GLT25D1, FDPS, ALMS1, CRAT, BRCA1, GGT5, P2RX7, MLYCD, ISPD, PLCG2, PIP4K2A, IDI1, ACOX1, HEXA, PRKAG2, HEXB, LTC4S, ACSF3, ACSF2, SC4MOL, FAR1, GPX1, PIGK, CRYL1, PIGF, ANG, SMPDL3A, ACOT11, AGPAT9, PIGB, GNPAT, PCYT2, AASD…	1865	482	14219	1.55013
Annotation Cluster 5	Enrichment Score: 5.593892491859863
Category	Term	Count	%	PValue	Genes	List Total	Pop Hits	Pop Total	Fold Enrichment
GOTERM_BP_ALL	GO:0005975~carbohydrate metabolic process	108	4.39739	4.75355e-10	GNPTG, LDHB, GNPDA1, GLB1L, IL6ST, GBGT1, DAK, PGLYRP1, ITPKA, SLC2A8, NANS, RPN1, NANP, B3GALTL, CMAS, FUT11, FUT10, DPAGT1, GLCE, PGM5, MLEC, SLC37A2, NEU3, UGGT2, UGGT1, MDH1, PHKA2, PFKFB4, MAMDC2, GNE, PFKFB2, ALDOC, PHKA1, ST8SIA1, ATHL1, HEXDC, NAGK, G6PC3, GPD1L, B3GNT8, GALM, B3GNT5, NAGA, IDH2, GALC, IDH1, GALE, B3GNT3, B4GALT6, B4GALT4, ST6GAL1, GLT25D1, GUSB, CHI3L1, NPL, CHI3L3, BPGM…	1865	454	14219	1.81367
GOTERM_BP_ALL	GO:0044262~cellular carbohydrate metabolic process	78	3.1759	1.39688e-07	GNPTG, LDHB, IMPA2, GNPDA1, IL6ST, PHKB, DAK, ALG6, ALG8, ITPKA, ACN9, SLC2A8, UGT1A7C, POMT1, RPN1, MAN2B1, MYC, NANP, B3GALTL, CMAS, FUT11, FUT10, DPAGT1, PFKM, KRTCAP2, PMM1, MAN2A2, PGM5, H6PD, SLC37A2, DOLPP1, UGGT2, UGGT1, XYLB, MDH1, PHKA2, GALNT2, GALNT1, SORD, PFKFB4, GNE, FUT7, PFKFB2, ALDOC, PHKA1, ST8SIA1, NAGK, G6PC3, GPD1L, GALK2, B3GNT8, GALM, GALNT10, B3GNT5, IDH2, IDH1, FUT4, CD4…	1865	327	14219	1.8186
GOTERM_BP_ALL	GO:0006066~alcohol metabolic process	82	3.33876	5.00613e-07	TM7SF2, LDHB, CYB5R1, IMPA2, GNPDA1, SNCAIP, HPRT, IL6ST, PHKB, DAK, PMVK, ITPKA, ACN9, FDFT1, SC4MOL, SLC2A8, CYP39A1, UGT1A7C, MAN2B1, MYC, NANP, DHCR24, B3GALTL, CMAS, PCTP, PFKM, SIGMAR1, PMM1, PNPLA7, MAN2A2, EBPL, PGM5, H6PD, SLC37A2, XYLB, MDH1, CLN6, PHKA2, CYP51, SORD, PFKFB4, GNE, PFKFB2, ALDOC, PHKA1, ADH5, ABCA2, NAGK, G6PC3, GPD1L, GALK2, GALM, LY6E, DHCR7, PEMT, SCARB1, PCYT1A, GALE…	1865	360	14219	1.73661
GOTERM_BP_ALL	GO:0005996~monosaccharide metabolic process	42	1.7101	0.00086844	PHKA2, LDHB, GNPDA1, PFKFB4, GNE, PHKB, IL6ST, ALDOC, PFKFB2, PHKA1, NAGK, ACN9, G6PC3, SLC2A8, GALK2, GALM, UGT1A7C, GALE, RPIA, MAN2B1, MYC, NANP, B3GALTL, PDK2, CMAS, BPGM, PFKM, DLAT, FUCA2, PCK2, FUCA1, CPT1A, PMM1, MAN2A2, PGM5, GANC, H6PD, PYGL, MAPK14, CACNA1A, MDH1, XYLB	1865	191	14219	1.67651
GOTERM_BP_ALL	GO:0019318~hexose metabolic process	36	1.4658	0.00371638	PHKA2, LDHB, GNPDA1, PFKFB4, PHKB, IL6ST, ALDOC, PFKFB2, PHKA1, ACN9, G6PC3, SLC2A8, GALK2, GALM, GALE, RPIA, MAN2B1, MYC, B3GALTL, PDK2, BPGM, PFKM, DLAT, PCK2, FUCA2, FUCA1, CPT1A, PMM1, MAN2A2, PGM5, GANC, H6PD, PYGL, MAPK14, CACNA1A, MDH1	1865	169	14219	1.62407
Annotation Cluster 6	Enrichment Score: 4.995141995953509
Category	Term	Count	%	PValue	Genes	List Total	Pop Hits	Pop Total	Fold Enrichment
GOTERM_BP_ALL	GO:0009987~cellular process	1422	57.899	2.49767e-29	MEF2C, LDHB, MEF2A, GBGT1, ASCC1, MED22, MAP3K5, MAP3K9, MED27, STAG3, PATZ1, RAB27A, ACAA2, GATM, KIF5A, TAF4B, LIG1, KIF5C, MED14, ESPL1, PROX2, NCAPD3, NCAPD2, RP2H, RAD1, GLUL, F5, DHX29, ZFP280C, BACE1, ADSL, EIF2AK3, HACL1, ADSS, SDAD1, DUSP10, RCC1, MYBL2, DUSP19, LYL1, CDC123, GCSH, LFNG, NTHL1, SPP1, RECQL4, FOXRED2, GARS, DUSP22, NDC80, USF1, ATM, EMILIN1, GART, PRPSAP2, NOLC1, RGS2, ML…	1865	9252	14219	1.1718
GOTERM_BP_ALL	GO:0008152~metabolic process	1130	46.0098	6.3503e-26	MEF2C, LDHB, MEF2A, GBGT1, ASCC1, MED22, MAP3K5, MAP3K9, MED27, ACAA2, GATM, TAF4B, LIG1, F9, MED14, ESPL1, PROX2, RP2H, RAD1, EBPL, GLUL, F5, DHX29, ZFP280C, BACE1, ADSL, EIF2AK3, HSD17B11, HACL1, ADSS, DUSP10, MYBL2, DUSP19, LYL1, GCSH, NAT10, NTHL1, RECQL4, FOXRED2, GARS, DUSP22, ENGASE, USF1, ATM, GART, PRPSAP2, MLYCD, CDC42BPA, PARP3, POP5, PARP1, ACAD11, ACAD10, RERE, BCKDK, KLK1B11, KCNAB2…	1865	7020	14219	1.22725
GOTERM_BP_ALL	GO:0044237~cellular metabolic process	956	38.9251	1.52393e-21	MEF2C, LDHB, MEF2A, GBGT1, ASCC1, MED22, MAP3K5, MAP3K9, MED27, ACAA2, GATM, TAF4B, LIG1, MED14, PROX2, RP2H, RAD1, GLUL, DHX29, ZFP280C, BACE1, ADSL, EIF2AK3, HACL1, ADSS, DUSP10, MYBL2, DUSP19, LYL1, GCSH, NTHL1, RECQL4, FOXRED2, GARS, DUSP22, USF1, ATM, PRPSAP2, GART, MLYCD, CDC42BPA, PARP3, PARP1, POP5, RERE, BCKDK, GAR1, NUAK1, EZH2, AKR1C12, ATP10D, DDI2, UGT1A7C, EEF2K, VKORC1, TWISTNB, TA…	1865	5857	14219	1.24444
GOTERM_BP_ALL	GO:0044238~primary metabolic process	982	39.9837	1.83255e-17	MEF2C, LDHB, MEF2A, GBGT1, ASCC1, MED22, MAP3K5, MAP3K9, MED27, ACAA2, GATM, TAF4B, LIG1, F9, MED14, ESPL1, PROX2, RP2H, RAD1, EBPL, GLUL, DHX29, ZFP280C, BACE1, ADSL, EIF2AK3, HSD17B11, HACL1, ADSS, DUSP10, MYBL2, DUSP19, LYL1, GCSH, NTHL1, RECQL4, FOXRED2, GARS, DUSP22, USF1, ATM, PRPSAP2, GART, MLYCD, CDC42BPA, PARP3, PARP1, ACAD11, POP5, RERE, BCKDK, KLK1B11, GAR1, NUAK1, EZH2, ATP10D, PMVK, …	1865	6211	14219	1.20542
GOTERM_BP_ALL	GO:0006807~nitrogen compound metabolic process	544	22.1498	3.94089e-13	MEF2C, FHIT, XRCC3, MEF2A, XRCC2, LSM6, XRCC6, ASCC1, MPV17, INTS2, MED22, FAH, CDCA7, FLI1, INTS7, MED27, LSM5, LSM2, LUC7L3, YARS, GATM, TADA2A, LIG1, TAF4B, ZHX1, MED14, PROX2, RP2H, RAD1, NME4, WDR83, GLUL, NME3, ZFP280C, NME1, ADSL, VGLL4, TRAPPC2, PRODH, ADSS, ETOHI1, PUS3, PPT1, MYBL2, PUS7, LYL1, PEMT, GCSH, NTHL1, RECQL4, KLF13, KLF10, MAOA, PHB, EME1, GARS, USF1, ATM, PRPSAP2, GART, HEB…	1865	3196	14219	1.29772
GOTERM_BP_ALL	GO:0034641~cellular nitrogen compound metabolic process	529	21.5391	8.58361e-13	MEF2C, FHIT, XRCC3, MEF2A, XRCC2, LSM6, XRCC6, ASCC1, MPV17, INTS2, MED22, FAH, CDCA7, FLI1, INTS7, MED27, LSM5, LSM2, LUC7L3, YARS, TADA2A, LIG1, TAF4B, ZHX1, MED14, PROX2, RP2H, RAD1, NME4, WDR83, GLUL, NME3, ZFP280C, NME1, ADSL, VGLL4, TRAPPC2, PRODH, ADSS, ETOHI1, PUS3, PPT1, MYBL2, PUS7, LYL1, PEMT, GCSH, NTHL1, RECQL4, KLF13, KLF10, MAOA, PHB, EME1, GARS, USF1, ATM, PRPSAP2, GART, PCNA, POP…	1865	3105	14219	1.29893
GOTERM_BP_ALL	GO:0009058~biosynthetic process	509	20.7248	3.80471e-10	MEF2C, FHIT, MEF2A, PTGS1, ASCC1, MPV17, MED22, CDCA7, FLI1, MED27, YARS, GATM, TADA2A, LIG1, TAF4B, ZHX1, DPAGT1, MED14, PROX2, RP2H, NME4, GLUL, NME3, DHX29, ZFP280C, NME1, ADSL, VGLL4, EIF2AK3, TRAPPC2, PRODH, HSD17B11, ADSS, ETOHI1, HFE, MYBL2, LYL1, PEMT, KLF13, KLF10, PHB, GARS, DLAT, USF1, RPS8, GART, PRPSAP2, MLYCD, PCNA, RERE, EZH2, ATP10D, LTC4S, PMVK, ACN9, DDI2, CCNE2, MTHFD1, NUBP1, …	1865	3076	14219	1.2616
GOTERM_BP_ALL	GO:0006139~nucleobase, nucleoside, nucleotide and nucleic acid metabolic process	477	19.4218	1.70452e-09	MEF2C, FHIT, MEF2A, XRCC3, XRCC2, LSM6, XRCC6, ASCC1, MPV17, INTS2, MED22, CDCA7, FLI1, INTS7, MED27, LSM5, LSM2, LUC7L3, YARS, TADA2A, LIG1, TAF4B, ZHX1, MED14, PROX2, RP2H, RAD1, NME4, WDR83, NME3, ZFP280C, NME1, ADSL, VGLL4, TRAPPC2, ADSS, ETOHI1, PUS3, PPT1, MYBL2, PUS7, LYL1, NTHL1, RECQL4, KLF13, KLF10, PHB, EME1, GARS, USF1, ATM, GART, PRPSAP2, PCNA, POP5, PARP1, RERE, GAR1, EZH2, ATP10D, …	1865	2881	14219	1.26231
GOTERM_BP_ALL	GO:0044249~cellular biosynthetic process	484	19.7068	1.95083e-08	MEF2C, FHIT, MEF2A, PTGS1, ASCC1, MPV17, MED22, CDCA7, FLI1, MED27, YARS, GATM, TADA2A, LIG1, TAF4B, ZHX1, DPAGT1, MED14, PROX2, RP2H, NME4, GLUL, NME3, DHX29, ZFP280C, NME1, ADSL, VGLL4, EIF2AK3, PRODH, TRAPPC2, ADSS, ETOHI1, MYBL2, LYL1, PEMT, KLF13, KLF10, PHB, GARS, DLAT, USF1, RPS8, GART, PRPSAP2, MLYCD, PCNA, RERE, EZH2, ATP10D, LTC4S, ACN9, DDI2, CCNE2, MTHFD1, NUBP1, VKORC1, TWISTNB, TARS…	1865	2980	14219	1.23828
GOTERM_BP_ALL	GO:0044260~cellular macromolecule metabolic process	676	27.5244	1.72343e-05	MEF2C, FHIT, XRCC3, MEF2A, XRCC2, LSM6, XRCC6, ASCC1, MPV17, INTS2, MED22, ERO1LB, MAP3K5, CDCA7, FLI1, MAP3K9, INTS7, MED27, LSM5, LSM2, MAP2K6, LUC7L3, CDCA3, YARS, TNIK, TADA2A, LIG1, TAF4B, ZHX1, SKP2, PTPRS, DPAGT1, MED14, PROX2, PTPRO, RAD1, WDR83, DHX29, PTPRV, ZFP280C, BACE1, VGLL4, EIF2AK3, TRAPPC2, GGCX, ETOHI1, PUS3, WDR5B, DUSP10, PPT1, MYBL2, PUS7, DUSP19, LYL1, NTHL1, RECQL4, KLF13,…	1865	4549	14219	1.13298
GOTERM_BP_ALL	GO:0043170~macromolecule metabolic process	735	29.9267	0.000519496	MEF2C, FHIT, XRCC3, MEF2A, XRCC2, LSM6, XRCC6, ASCC1, MPV17, INTS2, MED22, ERO1LB, MAP3K5, CDCA7, FLI1, MAP3K9, INTS7, MED27, LSM5, LSM2, MAP2K6, LUC7L3, CDCA3, YARS, TNIK, TADA2A, LIG1, TAF4B, ZHX1, SKP2, PTPRS, DPAGT1, F9, MED14, ESPL1, PROX2, PTPRO, RAD1, WDR83, DHX29, PTPRV, ZFP280C, ST14, BACE1, VGLL4, EIF2AK3, TRAPPC2, GGCX, ETOHI1, PUS3, WDR5B, DUSP10, PPT1, MYBL2, PUS7, DUSP19, LYL1, NTHL…	1865	5110	14219	1.09662
GOTERM_BP_ALL	GO:0034645~cellular macromolecule biosynthetic process	355	14.4544	0.00524999	ITGB3BP, MEF2C, FHIT, MEF2A, TARS2, ASCC1, HIRA, MPV17, MED22, PRIM1, ZFP472, ZFP94, FLI1, ZFP93, CDCA7, PRIM2, MED27, CREB3L2, CREB3L1, MRPL39, MRPL33, EIF2B3, POLK, MRPL51, YARS, POLI, ZFP329, TADA2A, POLH, LIG1, TAF4B, POLE, ZHX1, DPAGT1, MED14, ZFP78, PROX2, GLCE, PPARGC1B, ZFP74, RFC5, SUV420H2, ZFP82, UHRF1, RFC4, DHX29, RFC1, ZFP280C, TBRG1, MRPL49, MRPL47, CDCA7L, VGLL4, EIF2AK3, EXT2, TR…	1865	2398	14219	1.12868
GOTERM_BP_ALL	GO:0009059~macromolecule biosynthetic process	355	14.4544	0.00674493	ITGB3BP, MEF2C, FHIT, MEF2A, TARS2, ASCC1, HIRA, MPV17, MED22, PRIM1, ZFP472, ZFP94, FLI1, ZFP93, CDCA7, PRIM2, MED27, CREB3L2, CREB3L1, MRPL39, MRPL33, EIF2B3, POLK, MRPL51, YARS, POLI, ZFP329, TADA2A, POLH, LIG1, TAF4B, POLE, ZHX1, DPAGT1, MED14, ZFP78, PROX2, GLCE, PPARGC1B, ZFP74, RFC5, SUV420H2, ZFP82, UHRF1, RFC4, DHX29, RFC1, ZFP280C, TBRG1, MRPL49, MRPL47, CDCA7L, VGLL4, EIF2AK3, EXT2, TR…	1865	2406	14219	1.12492
GOTERM_BP_ALL	GO:0010467~gene expression	341	13.8844	0.438826	ITGB3BP, MEF2C, MEF2A, TARS2, TRMT2A, LSM6, TRMT2B, ASCC1, HIRA, MPV17, INTS2, MED22, PRIM1, ZFP472, ZFP94, FLI1, ZFP93, CDCA7, INTS7, PRIM2, MED27, CREB3L2, CFH, LSM5, CREB3L1, LSM2, MRPL39, MRPL33, EIF2B3, LUC7L3, MRPL51, YARS, ZFP329, TADA2A, TAF4B, ZHX1, MED14, ZFP78, PROX2, PPARGC1B, ZFP74, SUV420H2, WDR83, ZFP82, UHRF1, DHX29, RFC1, ZFP280C, TRMT12, MRPL49, MRPL47, CDCA7L, VGLL4, EIF2AK3, T…	1865	2571	14219	1.01121
GOTERM_BP_ALL	GO:0006350~transcription	222	9.03909	0.812171	MEF2C, ITGB3BP, MEF2A, HIRA, ASCC1, MPV17, MED22, PRIM1, ZFP472, ZFP94, FLI1, CDCA7, ZFP93, MED27, PRIM2, CREB3L2, CREB3L1, ZFP329, TADA2A, TAF4B, ZHX1, MED14, ZFP78, PROX2, PPARGC1B, ZFP74, SUV420H2, ZFP82, UHRF1, RFC1, ZFP280C, CDCA7L, VGLL4, TRAPPC2, ETOHI1, TAF9B, TADA1, MYBL2, AHRR, LYL1, HTATSF1, ZFP810, HIP1, IKZF2, KLF13, KLF10, ZFP449, ZFP606, USF1, ZFP748, ZFP809, ZFP808, ZFP442, RAD54B…	1865	1772	14219	0.955167
GOTERM_BP_ALL	GO:0019222~regulation of metabolic process	367	14.943	0.892488	ADCY3, ITGB3BP, MEF2C, MEF2A, ADCY7, S100A9, ASCC1, HIRA, MED22, ZFP472, ZFP94, MAP3K5, FLI1, ZFP93, CDCA7, WWP1, WDR77, MED27, CREB3L2, CFH, YEATS2, RAB23, CREB3L1, PATZ1, CCNA2, MAP2K6, GNG7, IBTK, ZFP329, TADA2A, ZHX1, SKP2, MED14, ZFP78, PROX2, PPARGC1B, ZFP74, SUV420H2, ZFP82, UHRF1, RFC1, ZFP280C, TBRG1, CDCA7L, VGLL4, EIF2AK3, GATC, TRAPPC2, PALM, ETOHI1, AIRN, HUS1, TAF9B, IFI30, TADA1, M…	1865	2942	14219	0.951072
GOTERM_BP_ALL	GO:0031323~regulation of cellular metabolic process	346	14.0879	0.903307	ADCY3, ITGB3BP, MEF2C, MEF2A, ADCY7, ASCC1, HIRA, MED22, ZFP472, ZFP94, MAP3K5, FLI1, ZFP93, CDCA7, WWP1, WDR77, MED27, CREB3L2, YEATS2, RAB23, CREB3L1, PATZ1, CCNA2, MAP2K6, GNG7, IBTK, ZFP329, TADA2A, ZHX1, MED14, ZFP78, PROX2, PPARGC1B, ZFP74, SUV420H2, ZFP82, UHRF1, RFC1, ZFP280C, CDCA7L, VGLL4, EIF2AK3, GATC, TRAPPC2, PALM, ETOHI1, HUS1, TAF9B, TADA1, MYBL2, AHRR, DUSP19, LYL1, HTATSF1, FBXO…	1865	2786	14219	0.946859
GOTERM_BP_ALL	GO:0060255~regulation of macromolecule metabolic process	330	13.4365	0.935966	ITGB3BP, MEF2C, MEF2A, S100A9, ASCC1, HIRA, MED22, ZFP472, ZFP94, FLI1, ZFP93, CDCA7, WWP1, WDR77, MED27, CREB3L2, CFH, YEATS2, RAB23, CREB3L1, PATZ1, CCNA2, IBTK, ZFP329, TADA2A, ZHX1, SKP2, MED14, ZFP78, PROX2, PPARGC1B, ZFP74, SUV420H2, ZFP82, UHRF1, RFC1, ZFP280C, TBRG1, CDCA7L, VGLL4, EIF2AK3, GATC, TRAPPC2, ETOHI1, AIRN, HUS1, TAF9B, IFI30, TADA1, MYBL2, AHRR, LYL1, HTATSF1, FBXO5, MAML3, Z…	1865	2688	14219	0.935998
GOTERM_BP_ALL	GO:0051171~regulation of nitrogen compound metabolic process	283	11.5228	0.976109	ADCY3, ITGB3BP, MEF2C, MEF2A, ADCY7, HIRA, ASCC1, MED22, ZFP472, ZFP94, FLI1, CDCA7, ZFP93, WWP1, WDR77, MED27, CREB3L2, YEATS2, CREB3L1, PATZ1, CCNA2, GNG7, ZFP329, TADA2A, ZHX1, MED14, ZFP78, PROX2, PPARGC1B, ZFP74, SUV420H2, ZFP82, UHRF1, RFC1, ZFP280C, CDCA7L, VGLL4, TRAPPC2, PALM, ETOHI1, HUS1, TAF9B, TADA1, MYBL2, AHRR, LYL1, HTATSF1, MAML3, ZFP810, HIP1, IKZF2, KLF13, KLF10, ZFP449, ZFP606…	1865	2372	14219	0.909624
GOTERM_BP_ALL	GO:0019219~regulation of nucleobase, nucleoside, nucleotide and nucleic acid metabolic process	280	11.4007	0.978347	ADCY3, ITGB3BP, MEF2C, MEF2A, ADCY7, HIRA, ASCC1, MED22, ZFP472, ZFP94, FLI1, CDCA7, ZFP93, WWP1, WDR77, MED27, CREB3L2, YEATS2, CREB3L1, PATZ1, CCNA2, GNG7, ZFP329, TADA2A, ZHX1, MED14, ZFP78, PROX2, PPARGC1B, ZFP74, SUV420H2, ZFP82, UHRF1, RFC1, ZFP280C, CDCA7L, VGLL4, TRAPPC2, ETOHI1, PALM, HUS1, TAF9B, TADA1, MYBL2, AHRR, LYL1, HTATSF1, MAML3, ZFP810, HIP1, IKZF2, KLF13, KLF10, ZFP449, ZFP606…	1865	2353	14219	0.907249
GOTERM_BP_ALL	GO:0010468~regulation of gene expression	289	11.7671	0.980275	ITGB3BP, MEF2C, MEF2A, HIRA, ASCC1, MED22, ZFP472, ZFP94, FLI1, ZFP93, CDCA7, WWP1, WDR77, MED27, CREB3L2, YEATS2, CFH, CREB3L1, PATZ1, CCNA2, ZFP329, TADA2A, ZHX1, SKP2, MED14, ZFP78, PROX2, PPARGC1B, ZFP74, SUV420H2, ZFP82, UHRF1, RFC1, ZFP280C, TBRG1, CDCA7L, VGLL4, EIF2AK3, TRAPPC2, GATC, ETOHI1, AIRN, TAF9B, IFI30, TADA1, MYBL2, AHRR, LYL1, HTATSF1, MAML3, ZFP810, HIP1, IKZF2, KLF13, KLF10, …	1865	2429	14219	0.907111
GOTERM_BP_ALL	GO:0010556~regulation of macromolecule biosynthetic process	282	11.4821	0.983195	ITGB3BP, MEF2C, MEF2A, S100A9, HIRA, ASCC1, MED22, ZFP472, ZFP94, FLI1, CDCA7, ZFP93, WWP1, WDR77, MED27, CREB3L2, YEATS2, CREB3L1, PATZ1, CCNA2, ZFP329, TADA2A, ZHX1, MED14, ZFP78, PROX2, PPARGC1B, ZFP74, SUV420H2, ZFP82, UHRF1, RFC1, ZFP280C, CDCA7L, VGLL4, EIF2AK3, TRAPPC2, GATC, ETOHI1, HUS1, TAF9B, TADA1, MYBL2, AHRR, LYL1, HTATSF1, MAML3, ZFP810, HIP1, IKZF2, KLF13, KLF10, ZFP449, ZFP606, U…	1865	2381	14219	0.902984
GOTERM_BP_ALL	GO:0080090~regulation of primary metabolic process	318	12.9479	0.984889	ADCY3, ITGB3BP, MEF2C, MEF2A, ADCY7, ASCC1, HIRA, MED22, ZFP472, ZFP94, FLI1, ZFP93, CDCA7, WWP1, WDR77, MED27, CREB3L2, YEATS2, RAB23, CFH, CREB3L1, PATZ1, CCNA2, GNG7, IBTK, ZFP329, TADA2A, ZHX1, MED14, ZFP78, PROX2, PPARGC1B, ZFP74, SUV420H2, ZFP82, UHRF1, RFC1, ZFP280C, CDCA7L, VGLL4, EIF2AK3, GATC, TRAPPC2, PALM, ETOHI1, HUS1, TAF9B, TADA1, MYBL2, AHRR, LYL1, HTATSF1, FBXO5, MAML3, ZFP810, H…	1865	2672	14219	0.907363
GOTERM_BP_ALL	GO:0031326~regulation of cellular biosynthetic process	291	11.8485	0.987672	ADCY3, ITGB3BP, MEF2C, MEF2A, ADCY7, HIRA, ASCC1, MED22, ZFP472, ZFP94, FLI1, ZFP93, CDCA7, WWP1, WDR77, MED27, CREB3L2, YEATS2, CREB3L1, PATZ1, CCNA2, GNG7, ZFP329, TADA2A, ZHX1, MED14, ZFP78, PROX2, PPARGC1B, ZFP74, SUV420H2, ZFP82, UHRF1, RFC1, ZFP280C, CDCA7L, VGLL4, EIF2AK3, TRAPPC2, GATC, PALM, ETOHI1, HUS1, TAF9B, TADA1, MYBL2, AHRR, LYL1, HTATSF1, MAML3, ZFP810, HIP1, IKZF2, KLF13, KLF10,…	1865	2467	14219	0.89932
GOTERM_BP_ALL	GO:0009889~regulation of biosynthetic process	292	11.8893	0.987948	ADCY3, ITGB3BP, MEF2C, MEF2A, ADCY7, S100A9, HIRA, ASCC1, MED22, ZFP472, ZFP94, FLI1, ZFP93, CDCA7, WWP1, WDR77, MED27, CREB3L2, YEATS2, CREB3L1, PATZ1, CCNA2, GNG7, ZFP329, TADA2A, ZHX1, MED14, ZFP78, PROX2, PPARGC1B, ZFP74, SUV420H2, ZFP82, UHRF1, RFC1, ZFP280C, CDCA7L, VGLL4, EIF2AK3, TRAPPC2, GATC, PALM, ETOHI1, HUS1, TAF9B, TADA1, MYBL2, AHRR, LYL1, HTATSF1, MAML3, ZFP810, HIP1, IKZF2, KLF13…	1865	2476	14219	0.89913
GOTERM_BP_ALL	GO:0045449~regulation of transcription	258	10.5049	0.992919	ITGB3BP, MEF2C, MEF2A, HIRA, ASCC1, MED22, ZFP472, ZFP94, FLI1, CDCA7, ZFP93, WWP1, MED27, WDR77, CREB3L2, YEATS2, CREB3L1, PATZ1, CCNA2, ZFP329, TADA2A, ZHX1, MED14, ZFP78, PROX2, PPARGC1B, ZFP74, SUV420H2, ZFP82, UHRF1, RFC1, ZFP280C, CDCA7L, VGLL4, TRAPPC2, ETOHI1, TAF9B, TADA1, MYBL2, AHRR, LYL1, HTATSF1, MAML3, ZFP810, HIP1, IKZF2, KLF13, KLF10, ZFP449, ZFP606, USF1, ZFP748, ZBTB42, ZFP809, …	1865	2227	14219	0.883262
GOTERM_BP_ALL	GO:0006355~regulation of transcription, DNA-dependent	159	6.47394	0.998043	MEF2C, MEF2A, PASK, HIRA, CBX3, MED22, ZFP788, CBX8, ZFP472, ZFP94, FLI1, ZFP93, WDR77, MED27, YEATS2, CREB3L2, CREB3L1, PATZ1, ZFP273, MLL3, ZFP882, CIITA, SATB2, PKIG, ZHX1, MED14, ZFP78, ZFP128, PPARGC1B, ZFP74, HHEX, ZFP82, PA2G4, ZFP120, TRAPPC2, HMGB1, ETOHI1, HMGB2, ABCA2, ZFP764, NOSTRIN, ELK3, ZFP763, ZFP563, MEIS1, NR2C1, HOXA1, AHRR, OVOL2, ZFP157, ZFP760, TFDP2, MAML3, ZFP810, HELLS, …	1865	1465	14219	0.827465
GOTERM_BP_ALL	GO:0051252~regulation of RNA metabolic process	161	6.55537	0.998414	MEF2C, MEF2A, PASK, HIRA, CBX3, MED22, ZFP788, CBX8, ZFP472, ZFP94, FLI1, ZFP93, WDR77, MED27, YEATS2, CREB3L2, CREB3L1, PATZ1, ZFP273, MLL3, ZFP882, CIITA, SATB2, PKIG, ZHX1, MED14, ZFP78, ZFP128, PPARGC1B, ZFP74, HHEX, ZFP82, PA2G4, ZFP120, TRAPPC2, HMGB1, ETOHI1, HMGB2, ABCA2, ZFP764, NOSTRIN, ELK3, ZFP763, MEIS1, ZFP563, NR2C1, HOXA1, AHRR, OVOL2, ZFP157, ZFP760, TFDP2, MAML3, ZFP810, HELLS, …	1865	1488	14219	0.824923
GOTERM_BP_ALL	GO:0065007~biological regulation	772	31.4332	1	MEF2C, MEF2A, ASCC1, MED22, LPHN2, HMHA1, MAP3K5, MED27, YEATS2, PATZ1, RAB27A, LIFR, F9, MED14, PROX2, F5, ZFP280C, TFPI, EIF2AK3, GATC, MYBL2, DUSP19, LYL1, SPP1, RECQL4, DUSP22, USF1, ATM, GAS6, EMILIN1, EI24, GNGT2, RGS2, RGS3, MLYCD, CDC42BPA, TREML1, ACAD11, PARP1, RERE, BCKDK, EZH2, DDI2, STAC2, VKORC1, CEACAM1, ALS2CL, AIFM2, AW146154, ARHGEF10, SS18, CARD11, DOK2, DOK4, ABI3, IGSF11, DHC…	1865	6903	14219	0.852648
GOTERM_BP_ALL	GO:0050794~regulation of cellular process	682	27.7687	1	MEF2C, MEF2A, XRCC2, PLEKHM1, XRCC6, PTGS1, ASCC1, L1CAM, MED22, LPHN2, HMHA1, MAP3K5, CDCA7, FLI1, MED27, WDR77, YEATS2, GNG2, PATZ1, CCNA2, MAP2K6, GNG7, RAB27A, IBTK, TNIK, TADA2A, ZHX1, SKP2, LIFR, MED14, PROX2, PTPRV, ZFP280C, VGLL4, EIF2AK3, GATC, TRAPPC2, ETOHI1, PPT1, MYBL2, DUSP19, LYL1, CDC42EP3, ARHGEF10L, SPP1, RECQL4, KLF13, KLF10, TGFBR1, ROGDI, DUSP22, HGF, USF1, ATM, EMILIN1, WDR6…	1865	6224	14219	0.83542
GOTERM_BP_ALL	GO:0050789~regulation of biological process	720	29.316	1	MEF2C, MEF2A, XRCC2, PLEKHM1, XRCC6, PTGS1, ASCC1, L1CAM, MED22, LPHN2, HMHA1, MAP3K5, CDCA7, FLI1, MED27, WDR77, YEATS2, GNG2, PATZ1, CCNA2, MAP2K6, GNG7, RAB27A, IBTK, TNIK, TADA2A, ZHX1, SKP2, LIFR, MED14, PROX2, PTPRV, ZFP280C, VGLL4, EIF2AK3, GATC, TRAPPC2, ETOHI1, PPT1, MYBL2, DUSP19, LYL1, CDC42EP3, ARHGEF10L, SPP1, RECQL4, KLF13, KLF10, TGFBR1, ROGDI, DUSP22, HGF, TNNI3, USF1, GAS6, ATM, …	1865	6542	14219	0.839097
Annotation Cluster 7	Enrichment Score: 4.694710543937784
Category	Term	Count	%	PValue	Genes	List Total	Pop Hits	Pop Total	Fold Enrichment
GOTERM_BP_ALL	GO:0007017~microtubule-based process	58	2.36156	4.53369e-08	KIF23, KIFC2, KIFC1, CEP72, KIF22, KIF24, TUBB2B, MLH1, KIFC3, KIF13A, KIF2C, KIFAP3, TUBA1A, TUBA1B, TUBB3, KIF13B, KIF14, KIF11, KIF5A, KIF15, KIF5C, NUSAP1, ESPL1, KIF16B, PLK1S1, TACC3, TACC1, SS18, CNTROB, HAUS7, STMN1, HAUS4, TPPP3, HAUS5, CEP120, HAUS2, HAUS1, KIF19A, KIF9, SPC25, TUBGCP5, KIF7, FBXO5, TUBE1, PSRC1, KIF18A, NUF2, KIF18B, CENPE, NDC80, BIRC5, TUBGCP2, BRCA1, SMC3, NEDD1, CD…	1865	211	14219	2.09573
GOTERM_BP_ALL	GO:0000226~microtubule cytoskeleton organization	33	1.34365	9.22166e-06	HAUS4, TPPP3, CEP72, CEP120, HAUS5, HAUS2, HAUS1, MLH1, SPC25, TUBGCP5, FBXO5, TUBA1B, KIF11, PSRC1, NUF2, KIF18A, NUSAP1, NDC80, CENPE, BIRC5, ESPL1, PLK1S1, TACC3, TUBGCP2, BRCA1, TACC1, SMC3, SS18, NEDD1, CNTROB, CDC42BPA, HAUS7, STMN1	1865	111	14219	2.26663
GOTERM_BP_ALL	GO:0007010~cytoskeleton organization	57	2.32085	0.0197064	CEP72, MTSS1, ENAH, PDGFB, S100A9, MLH1, GSN, ANG, TUBA1B, AGAP2, FMNL1, TCHH, FMNL3, KIF11, NUSAP1, ESPL1, PLK1S1, TACC3, WAS, LPIN1, TACC1, SS18, CNTROB, HAUS7, STMN1, HAUS4, TPPP3, PALM, HAUS5, CEP120, HAUS2, HAUS1, SPC25, DOCK2, TUBGCP5, FBXO5, PSTPIP2, INF2, CAP2, PSRC1, KIF18A, NUF2, CENPE, NDC80, BIRC5, STRADB, RACGAP1, TUBGCP2, BRCA1, SMC3, NEDD1, EPB4.1L1, EPS8, SVIL, CDC42BPA, DIAP3, MY…	1865	326	14219	1.33305
Annotation Cluster 8	Enrichment Score: 3.785403320886909
Category	Term	Count	%	PValue	Genes	List Total	Pop Hits	Pop Total	Fold Enrichment
GOTERM_BP_ALL	GO:0006399~tRNA metabolic process	37	1.50651	1.78088e-07	PUS3, TARS2, LSM6, PUSL1, F13A1, TRMT2B, TYW3, VARS, KARS, RPP14, ADAT1, IARS, WARS, METTL1, QTRTD1, ADAT2, LARS, MARS2, POLG2, TSEN2, CDK5RAP1, TARSL2, TSEN15, MARS, TRMU, YARS, RARS2, GARS, AARSD1, TRMT61A, TRMT12, FARSB, CARS2, POP5, TRUB1, DUS4L, RPP40	1865	113	14219	2.4964
GOTERM_BP_ALL	GO:0043039~tRNA aminoacylation	17	0.692182	0.000145911	YARS, TARS2, RARS2, F13A1, GARS, AARSD1, VARS, KARS, IARS, WARS, FARSB, LARS, MARS2, CARS2, POLG2, TARSL2, MARS	1865	46	14219	2.81761
GOTERM_BP_ALL	GO:0043038~amino acid activation	17	0.692182	0.000145911	YARS, TARS2, RARS2, F13A1, GARS, AARSD1, VARS, KARS, IARS, WARS, FARSB, LARS, MARS2, CARS2, POLG2, TARSL2, MARS	1865	46	14219	2.81761
GOTERM_BP_ALL	GO:0006418~tRNA aminoacylation for protein translation	17	0.692182	0.000145911	YARS, TARS2, RARS2, F13A1, GARS, AARSD1, VARS, KARS, IARS, WARS, FARSB, LARS, MARS2, CARS2, POLG2, TARSL2, MARS	1865	46	14219	2.81761
GOTERM_BP_ALL	GO:0006412~translation	48	1.9544	0.213837	MRPS17, EIF4E3, RPL36A, TARS2, MRPS14, PSTK, F13A1, PTRH2, VARS, KARS, QRSL1, IARS, WARS, RPL30, ICT1, MRPL16, RPL3, LARS, MARS2, POLG2, MRPL39, FLT3L, TARSL2, EIF2B3, MRPL33, MARS, MRPL51, YARS, RARS2, GARS, MRPS5, AARSD1, RPS4X, RPS8, MRPS2, MRPL23, DHX29, RPL22, MTRF1, GSPT2, FARSB, MRPL49, CARS2, MRPL47, EEF1D, EIF5A2, EIF2AK3, KPNA2	1865	319	14219	1.1472
Annotation Cluster 9	Enrichment Score: 3.3436807768481924
Category	Term	Count	%	PValue	Genes	List Total	Pop Hits	Pop Total	Fold Enrichment
GOTERM_BP_ALL	GO:0009100~glycoprotein metabolic process	39	1.58795	2.28613e-05	SGSH, GNPTG, GALNT2, GALNT1, MAMDC2, FUT7, NDST2, IDE, ST8SIA1, ALG6, ALG8, B3GNT8, ASGR2, GALNT10, B3GNT5, POMT1, RPN1, FUT4, CD4, B3GNT3, DHCR24, CLN3, ST6GAL1, FUT11, FUT10, DPAGT1, IGF1, KRTCAP2, GLCE, PORCN, MANBA, LARGE, ST8SIA4, BACE1, CHSY1, UGGT2, DOLPP1, UGGT1, EXT2	1865	147	14219	2.02273
GOTERM_BP_ALL	GO:0009101~glycoprotein biosynthetic process	30	1.2215	0.000438604	GNPTG, GALNT2, GALNT1, NDST2, FUT7, ST8SIA1, ALG6, ALG8, B3GNT8, GALNT10, B3GNT5, POMT1, RPN1, FUT4, CD4, B3GNT3, ST6GAL1, FUT11, FUT10, DPAGT1, IGF1, KRTCAP2, GLCE, LARGE, ST8SIA4, CHSY1, UGGT2, DOLPP1, EXT2, UGGT1	1865	117	14219	1.9549
GOTERM_BP_ALL	GO:0070085~glycosylation	24	0.977199	0.00124015	GNPTG, GALNT2, ST6GAL1, GALNT1, FUT7, FUT11, FUT10, ST8SIA1, DPAGT1, ALG6, ALG8, KRTCAP2, B3GNT8, GALNT10, B3GNT5, POMT1, ST8SIA4, RPN1, FUT4, CD4, B3GNT3, DOLPP1, UGGT2, UGGT1	1865	91	14219	2.01076
GOTERM_BP_ALL	GO:0006486~protein amino acid glycosylation	24	0.977199	0.00124015	GNPTG, GALNT2, ST6GAL1, GALNT1, FUT7, FUT11, FUT10, ST8SIA1, DPAGT1, ALG6, ALG8, KRTCAP2, B3GNT8, GALNT10, B3GNT5, POMT1, ST8SIA4, RPN1, FUT4, CD4, B3GNT3, DOLPP1, UGGT2, UGGT1	1865	91	14219	2.01076
GOTERM_BP_ALL	GO:0043413~biopolymer glycosylation	24	0.977199	0.00124015	GNPTG, GALNT2, ST6GAL1, GALNT1, FUT7, FUT11, FUT10, ST8SIA1, DPAGT1, ALG6, ALG8, KRTCAP2, B3GNT8, GALNT10, B3GNT5, POMT1, ST8SIA4, RPN1, FUT4, CD4, B3GNT3, DOLPP1, UGGT2, UGGT1	1865	91	14219	2.01076
Annotation Cluster 10	Enrichment Score: 3.2011432135101603
Category	Term	Count	%	PValue	Genes	List Total	Pop Hits	Pop Total	Fold Enrichment
GOTERM_BP_ALL	GO:0051327~M phase of meiotic cell cycle	26	1.05863	0.000110231	ADCY3, RAD51C, NEK2, MLH1, MLH3, RPA1, PSMC3IP, FBXO5, PMS2, MNS1, STAG3, FANCA, LFNG, EXO1, MSH5, SGOL2, SGOL1, BRCA2, TOPBP1, ESPL1, SMC3, RAD50, CDC25B, SUV39H2, RAD51, FANCD2	1865	88	14219	2.25258
GOTERM_BP_ALL	GO:0007126~meiosis	26	1.05863	0.000110231	ADCY3, RAD51C, NEK2, MLH1, MLH3, RPA1, PSMC3IP, FBXO5, PMS2, MNS1, STAG3, FANCA, LFNG, EXO1, MSH5, SGOL2, SGOL1, BRCA2, TOPBP1, ESPL1, SMC3, RAD50, CDC25B, SUV39H2, RAD51, FANCD2	1865	88	14219	2.25258
GOTERM_BP_ALL	GO:0051321~meiotic cell cycle	26	1.05863	0.000163348	ADCY3, RAD51C, NEK2, MLH1, MLH3, RPA1, PSMC3IP, FBXO5, PMS2, MNS1, STAG3, FANCA, LFNG, EXO1, MSH5, SGOL2, SGOL1, BRCA2, TOPBP1, ESPL1, SMC3, RAD50, CDC25B, SUV39H2, RAD51, FANCD2	1865	90	14219	2.20253
GOTERM_BP_ALL	GO:0007127~meiosis I	9	0.36645	0.0790145	RAD51C, FANCD2, MSH5, FBXO5, MLH1, ESPL1, TOPBP1, MLH3, RAD51	1865	35	14219	1.96049
Genes more highly expressed in WT BMDMs vs M-BKO following 8 h M1 activation (312 genes, p<0.05, FDR<0.05)
Annotation Cluster 1	Enrichment Score: 3.734531670634191
Category	Term	Count	%	PValue	Genes	List Total	Pop Hits	Pop Total	Fold Enrichment
GOTERM_BP_ALL	GO:0002376~immune system process	33	11.2245	4.06138e-07	CXCL1, C3, ENPP2, IL4RA, PML, NLRX1, TTC7, ITPKB, IL15, CXCL11, TLR9, CXCL10, CCL24, CCL22, BCL3, NDRG1, RHOH, IL18RAP, IL27, TGFBR2, PIK3CD, H2-Q6, H2-Q7, H2-Q8, KDR, H2-Q9, C1QA, CCL12, CCND3, H2-T9, IRF7, IRF8, IL12B, JAK3, OAS1G, GBP1	218	791	14219	2.72113
GOTERM_BP_ALL	GO:0006955~immune response	23	7.82313	3.20145e-06	CXCL1, ENPP2, C3, IL4RA, NLRX1, IL15, CXCL11, TLR9, CXCL10, CCL24, CCL22, BCL3, IL18RAP, IL27, H2-Q6, H2-Q7, H2-Q8, H2-Q9, C1QA, CCL12, H2-T9, IRF7, IRF8, IL12B, OAS1G, GBP1	218	471	14219	3.18507
GOTERM_BP_ALL	GO:0006952~defense response	19	6.46259	0.000179232	CXCL1, LYZ2, IL18RAP, LYZ1, C3, IL27, NLRX1, CXCL11, H2-Q6, H2-Q7, H2-Q8, TLR9, H2-Q9, CXCL10, C1QA, CCL24, CCL12, CCL22, NUPR1, IRF8, BCL3, IGFBP4	218	448	14219	2.76623
GOTERM_BP_ALL	GO:0009611~response to wounding	16	5.44218	0.000289348	CXCL1, GATM, C3, IL27, TGFBR2, CXCL11, TLR9, CXCL10, CCL24, C1QA, CCL12, CCL22, NUPR1, PECAM1, HBEGF, IGFBP4	218	347	14219	3.00748
GOTERM_BP_ALL	GO:0006954~inflammatory response	12	4.08163	0.000682278	C1QA, CCL24, CXCL1, CCL12, CCL22, NUPR1, C3, IL27, CXCL11, IGFBP4, TLR9, CXCL10	218	225	14219	3.47865
GOTERM_BP_ALL	GO:0009605~response to external stimulus	22	7.48299	0.000803905	CXCL1, GATM, C3, ENPP2, IL27, TGFBR2, AXL, CABP4, CXCL11, TLR9, CXCL10, CCL24, C1QA, CCL12, CCL22, NUPR1, PECAM1, NR2F6, CMTM7, HBEGF, XCR1, IGFBP4	218	640	14219	2.2421
GOTERM_BP_ALL	GO:0006950~response to stress	33	11.2245	0.00106754	CXCL1, C3, PML, NLRX1, CXCL11, TLR9, CXCL10, CCL24, CCL22, BCL3, FAM129A, LYZ2, IL18RAP, LYZ1, GATM, IL27, TGFBR2, MAPK11, H2-Q6, H2-Q7, H2-Q8, H2-Q9, C1QA, CCL12, CCND1, UACA, TIMELESS, NUPR1, BBC3, PECAM1, IRF8, ERN1, TDG, HBEGF, AHSA1, IGFBP4	218	1184	14219	1.81792
GOTERM_BP_ALL	GO:0050896~response to stimulus	49	16.6667	0.0336776	IL15, CXCL11, TLR9, CXCL10, NR2F6, FAM129A, XCR1, IL18RAP, GATM, IL27, C1QA, CCND1, TIMELESS, H2-T9, ERN1, IL12B, OAS1G, GBP1, CXCL1, MFSD9, C3, ENPP2, IL4RA, PML, NLRX1, CABP4, CCL24, CCL22, BCL3, LYZ2, LYZ1, TGFBR2, AXL, MAPK11, H2-Q6, H2-Q7, H2-Q8, H2-Q9, CCL12, UACA, NUPR1, BBC3, IRF7, IFI27L2A, PECAM1, IRF8, TDG, CMTM7, HBEGF, TBL1X, AHSA1, IGFBP4	218	2437	14219	1.31145
Annotation Cluster 2	Enrichment Score: 1.8461849694034174
Category	Term	Count	%	PValue	Genes	List Total	Pop Hits	Pop Total	Fold Enrichment
GOTERM_BP_ALL	GO:0006793~phosphorus metabolic process	27	9.18367	0.000733459	RNASEL, ACVRL1, SSH3, PML, ATP6V0C, GALK1, IL12RB1, MAP3K4, MAP3K8, CSK, TGFBR2, PIK3CD, AXL, NPR1, MAPK11, WNK2, DAPK1, KDR, MTMR11, CCND1, DUSP2, DUSP1, DYRK1B, ERN1, JAK3, GADD45B, DUSP7	218	866	14219	2.03357
GOTERM_BP_ALL	GO:0006796~phosphate metabolic process	27	9.18367	0.000733459	RNASEL, ACVRL1, SSH3, PML, ATP6V0C, GALK1, IL12RB1, MAP3K4, MAP3K8, CSK, TGFBR2, PIK3CD, AXL, NPR1, MAPK11, WNK2, DAPK1, KDR, MTMR11, CCND1, DUSP2, DUSP1, DYRK1B, ERN1, JAK3, GADD45B, DUSP7	218	866	14219	2.03357
GOTERM_BP_ALL	GO:0016310~phosphorylation	22	7.48299	0.00326447	RNASEL, ACVRL1, TGFBR2, PIK3CD, AXL, PML, NPR1, MAPK11, WNK2, KDR, DAPK1, ATP6V0C, GALK1, CCND1, IL12RB1, MAP3K4, DYRK1B, MAP3K8, ERN1, JAK3, CSK, GADD45B	218	718	14219	1.99853
GOTERM_BP_ALL	GO:0006468~protein amino acid phosphorylation	19	6.46259	0.00929814	RNASEL, ACVRL1, TGFBR2, AXL, PML, NPR1, MAPK11, WNK2, KDR, DAPK1, CCND1, IL12RB1, MAP3K4, DYRK1B, MAP3K8, ERN1, JAK3, CSK, GADD45B	218	640	14219	1.93636
GOTERM_BP_ALL	GO:0043687~post-translational protein modification	26	8.84354	0.0186353	RNASEL, ACVRL1, SSH3, PML, KDM1B, USP18, IL12RB1, MAP3K4, MAP3K8, FBXO4, CSK, TGFBR2, AXL, NPR1, MAPK11, WNK2, DAPK1, KDR, CCND1, DUSP2, DUSP1, DYRK1B, ERN1, JAK3, GADD45B, DUSP7	218	1055	14219	1.60744
GOTERM_BP_ALL	GO:0006464~protein modification process	29	9.86395	0.0278828	RNASEL, ACVRL1, SSH3, PML, ABCA1, KDM1B, USP18, IL12RB1, MAP3K4, MAP3K8, FBXO4, CSK, ST6GAL1, TGFBR2, AXL, NPR1, MAPK11, WNK2, KDR, DAPK1, MGAT1, CCND1, DUSP2, DUSP1, DYRK1B, ERN1, JAK3, GADD45B, DUSP7	218	1260	14219	1.50121
GOTERM_BP_ALL	GO:0043412~biopolymer modification	29	9.86395	0.0462914	RNASEL, ACVRL1, SSH3, PML, ABCA1, KDM1B, USP18, IL12RB1, MAP3K4, MAP3K8, FBXO4, CSK, ST6GAL1, TGFBR2, AXL, NPR1, MAPK11, WNK2, KDR, DAPK1, MGAT1, CCND1, DUSP2, DUSP1, DYRK1B, ERN1, JAK3, GADD45B, DUSP7	218	1320	14219	1.43297
GOTERM_BP_ALL	GO:0044267~cellular protein metabolic process	37	12.585	0.23773	RNASEL, ACVRL1, RPL13, SSH3, PML, ABCA1, KDM1B, USP18, IL12RB1, MAP3K4, MAP3K8, FBXO4, CSK, ST6GAL1, SOCS3, SOCS1, TGFBR2, AXL, NPR1, MAPK11, LARS2, WNK2, KDR, DAPK1, MGAT1, CCND1, DUSP2, DUSP1, DYRK1B, ERN1, JAK3, TBL1X, GADD45B, NEURL2, AHSA1, NEURL3, DUSP7	218	2088	14219	1.1558
GOTERM_BP_ALL	GO:0019538~protein metabolic process	45	15.3061	0.259488	RNASEL, ACVRL1, RPL13, C3, SSH3, PML, ABCA1, MMP25, KDM1B, USP18, IL12RB1, MAP3K4, MAP3K8, FBXO4, CSK, KLK1B22, ST6GAL1, CAPN5, SOCS3, TGFBR2, SOCS1, AXL, NPR1, MAPK11, LARS2, WNK2, KDR, DAPK1, EML2, C1QA, MGAT1, CTSL, CCND1, DUSP2, DUSP1, DYRK1B, ERN1, JAK3, TBL1X, GADD45B, NEURL2, AHSA1, NEURL3, DUSP7, ADAMTS4	218	2615	14219	1.12241
Annotation Cluster 3	Enrichment Score: 1.7626537936394995
Category	Term	Count	%	PValue	Genes	List Total	Pop Hits	Pop Total	Fold Enrichment
GOTERM_BP_ALL	GO:0009605~response to external stimulus	22	7.48299	0.000803905	CXCL1, GATM, C3, ENPP2, IL27, TGFBR2, AXL, CABP4, CXCL11, TLR9, CXCL10, CCL24, C1QA, CCL12, CCL22, NUPR1, PECAM1, NR2F6, CMTM7, HBEGF, XCR1, IGFBP4	218	640	14219	2.2421
GOTERM_BP_ALL	GO:0042330~taxis	8	2.72109	0.00139904	CCL24, CCL12, CCL22, ENPP2, CMTM7, XCR1, CXCL11, CXCL10	218	109	14219	4.78714
GOTERM_BP_ALL	GO:0006935~chemotaxis	8	2.72109	0.00139904	CCL24, CCL12, CCL22, ENPP2, CMTM7, XCR1, CXCL11, CXCL10	218	109	14219	4.78714
GOTERM_BP_ALL	GO:0040011~locomotion	12	4.08163	0.0241796	CCL24, CCL12, CCL22, NAV1, ENPP2, CMTM7, HBEGF, CABP4, XCR1, CXCL11, KDR, CXCL10	218	364	14219	2.15027
GOTERM_BP_ALL	GO:0007626~locomotory behavior	8	2.72109	0.0747417	CCL24, CCL12, CCL22, ENPP2, CMTM7, XCR1, CXCL11, CXCL10	218	239	14219	2.18326
GOTERM_BP_ALL	GO:0042221~response to chemical stimulus	16	5.44218	0.378517	MFSD9, GATM, ENPP2, TGFBR2, PML, CXCL11, CXCL10, CCL24, CCL12, CCND1, CCL22, NUPR1, ERN1, CMTM7, XCR1, TBL1X	218	887	14219	1.17655
GOTERM_BP_ALL	GO:0007610~behavior	8	2.72109	0.426048	CCL24, CCL12, CCL22, ENPP2, CMTM7, XCR1, CXCL11, CXCL10	218	405	14219	1.28839
Annotation Cluster 4	Enrichment Score: 1.7452901564416743
Category	Term	Count	%	PValue	Genes	List Total	Pop Hits	Pop Total	Fold Enrichment
GOTERM_BP_ALL	GO:0006917~induction of apoptosis	11	3.7415	0.000245241	TRIM35, UACA, CEBPB, NUPR1, BBC3, PML, ERN1, BCL3, PPP1R13B, RUNX3, DAPK1	218	167	14219	4.29624
GOTERM_BP_ALL	GO:0012502~induction of programmed cell death	11	3.7415	0.000245241	TRIM35, UACA, CEBPB, NUPR1, BBC3, PML, ERN1, BCL3, PPP1R13B, RUNX3, DAPK1	218	167	14219	4.29624
GOTERM_BP_ALL	GO:0008630~DNA damage response, signal transduction resulting in induction of apoptosis	5	1.70068	0.000372014	UACA, NUPR1, BBC3, PML, BCL3	218	23	14219	14.1793
GOTERM_BP_ALL	GO:0042771~DNA damage response, signal transduction by p53 class mediator resulting in induction of apoptosis	4	1.36054	0.00112691	NUPR1, BBC3, PML, BCL3	218	14	14219	18.6356
GOTERM_BP_ALL	GO:0042770~DNA damage response, signal transduction	6	2.04082	0.00173727	CCND1, UACA, NUPR1, BBC3, PML, BCL3	218	57	14219	6.86577
GOTERM_BP_ALL	GO:0008629~induction of apoptosis by intracellular signals	5	1.70068	0.00190652	UACA, NUPR1, BBC3, PML, BCL3	218	35	14219	9.31782
GOTERM_BP_ALL	GO:0030330~DNA damage response, signal transduction by p53 class mediator	4	1.36054	0.00283588	NUPR1, BBC3, PML, BCL3	218	19	14219	13.7315
GOTERM_BP_ALL	GO:0043065~positive regulation of apoptosis	11	3.7415	0.00481781	TRIM35, UACA, CEBPB, NUPR1, BBC3, PML, ERN1, BCL3, PPP1R13B, RUNX3, DAPK1	218	248	14219	2.89303
GOTERM_BP_ALL	GO:0043068~positive regulation of programmed cell death	11	3.7415	0.00511733	TRIM35, UACA, CEBPB, NUPR1, BBC3, PML, ERN1, BCL3, PPP1R13B, RUNX3, DAPK1	218	250	14219	2.86989
GOTERM_BP_ALL	GO:0010942~positive regulation of cell death	11	3.7415	0.0054097	TRIM35, UACA, CEBPB, NUPR1, BBC3, PML, ERN1, BCL3, PPP1R13B, RUNX3, DAPK1	218	252	14219	2.84711
GOTERM_BP_ALL	GO:0008219~cell death	13	4.42177	0.0896681	LYZ2, LYZ1, BCL2L14, PML, CD5L, DNASE1L3, DAPK1, TRIM35, BBC3, ERN1, FGL2, PPP1R13B, GADD45B	218	507	14219	1.67243
GOTERM_BP_ALL	GO:0016265~death	13	4.42177	0.100558	LYZ2, LYZ1, BCL2L14, PML, CD5L, DNASE1L3, DAPK1, TRIM35, BBC3, ERN1, FGL2, PPP1R13B, GADD45B	218	519	14219	1.63376
GOTERM_BP_ALL	GO:0051345~positive regulation of hydrolase activity	4	1.36054	0.126639	UACA, BBC3, PML, ERN1	218	81	14219	3.22098
GOTERM_BP_ALL	GO:0006974~response to DNA damage stimulus	8	2.72109	0.149122	CCND1, UACA, NUPR1, TIMELESS, BBC3, TDG, PML, BCL3	218	287	14219	1.81811
GOTERM_BP_ALL	GO:0033554~cellular response to stress	10	3.40136	0.167348	CCND1, UACA, NUPR1, TIMELESS, BBC3, TDG, PML, ERN1, BCL3, FAM129A	218	404	14219	1.61447
GOTERM_BP_ALL	GO:0042981~regulation of apoptosis	12	4.08163	0.224816	TRIM35, BCL2L14, UACA, CEBPB, NUPR1, BBC3, PML, ERN1, BCL3, PPP1R13B, RUNX3, DAPK1	218	553	14219	1.41537
GOTERM_BP_ALL	GO:0051716~cellular response to stimulus	12	4.08163	0.228032	CCND1, UACA, NUPR1, TIMELESS, BBC3, TDG, AXL, PML, ERN1, BCL3, CABP4, FAM129A	218	556	14219	1.40773
GOTERM_BP_ALL	GO:0043067~regulation of programmed cell death	12	4.08163	0.240325	TRIM35, BCL2L14, UACA, CEBPB, NUPR1, BBC3, PML, ERN1, BCL3, PPP1R13B, RUNX3, DAPK1	218	560	14219	1.39767
GOTERM_BP_ALL	GO:0010941~regulation of cell death	12	4.08163	0.242862	TRIM35, BCL2L14, UACA, CEBPB, NUPR1, BBC3, PML, ERN1, BCL3, PPP1R13B, RUNX3, DAPK1	218	563	14219	1.39023
GOTERM_BP_ALL	GO:0006915~apoptosis	10	3.40136	0.280075	TRIM35, BCL2L14, BBC3, PML, ERN1, PPP1R13B, CD5L, GADD45B, DNASE1L3, DAPK1	218	465	14219	1.40268
GOTERM_BP_ALL	GO:0012501~programmed cell death	10	3.40136	0.296055	TRIM35, BCL2L14, BBC3, PML, ERN1, PPP1R13B, CD5L, GADD45B, DNASE1L3, DAPK1	218	473	14219	1.37896
Annotation Cluster 5	Enrichment Score: 1.4075291134268682
Category	Term	Count	%	PValue	Genes	List Total	Pop Hits	Pop Total	Fold Enrichment
GOTERM_BP_ALL	GO:0051056~regulation of small GTPase mediated signal transduction	10	3.40136	0.00840632	ADAP2, SOS1, CYTH4, SIPA1L2, RAPGEF5, ITPKB, ASAP3, RAP1GAP2, RASA3, IQSEC2	218	228	14219	2.86074
GOTERM_BP_ALL	GO:0032012~regulation of ARF protein signal transduction	4	1.36054	0.0199772	ADAP2, CYTH4, ASAP3, IQSEC2	218	38	14219	6.86577
GOTERM_BP_ALL	GO:0009966~regulation of signal transduction	17	5.78231	0.0463549	FGFBP3, SOCS3, SOCS1, CYTH4, SIPA1L2, SKI, ITPKB, ASAP3, CCND1, LRP1, ADAP2, TULP3, SOS1, RAPGEF5, RASA3, RAP1GAP2, IQSEC2	218	661	14219	1.67749
GOTERM_BP_ALL	GO:0010646~regulation of cell communication	18	6.12245	0.0816076	FGFBP3, SOCS3, SOCS1, CYTH4, SIPA1L2, NLGN2, ITPKB, SKI, ASAP3, CCND1, LRP1, ADAP2, TULP3, SOS1, RAPGEF5, RASA3, RAP1GAP2, IQSEC2	218	771	14219	1.52276
GOTERM_BP_ALL	GO:0046578~regulation of Ras protein signal transduction	6	2.04082	0.14434	ADAP2, SOS1, CYTH4, ITPKB, ASAP3, IQSEC2	218	181	14219	2.16215
Annotation Cluster 6	Enrichment Score: 1.2877398162995963
Category	Term	Count	%	PValue	Genes	List Total	Pop Hits	Pop Total	Fold Enrichment
GOTERM_BP_ALL	GO:0008630~DNA damage response, signal transduction resulting in induction of apoptosis	5	1.70068	0.000372014	UACA, NUPR1, BBC3, PML, BCL3	218	23	14219	14.1793
GOTERM_BP_ALL	GO:0042770~DNA damage response, signal transduction	6	2.04082	0.00173727	CCND1, UACA, NUPR1, BBC3, PML, BCL3	218	57	14219	6.86577
GOTERM_BP_ALL	GO:0008629~induction of apoptosis by intracellular signals	5	1.70068	0.00190652	UACA, NUPR1, BBC3, PML, BCL3	218	35	14219	9.31782
GOTERM_BP_ALL	GO:0043280~positive regulation of caspase activity	3	1.02041	0.104238	UACA, BBC3, PML	218	36	14219	5.4354
GOTERM_BP_ALL	GO:0010952~positive regulation of peptidase activity	3	1.02041	0.104238	UACA, BBC3, PML	218	36	14219	5.4354
GOTERM_BP_ALL	GO:0051345~positive regulation of hydrolase activity	4	1.36054	0.126639	UACA, BBC3, PML, ERN1	218	81	14219	3.22098
GOTERM_BP_ALL	GO:0006974~response to DNA damage stimulus	8	2.72109	0.149122	CCND1, UACA, NUPR1, TIMELESS, BBC3, TDG, PML, BCL3	218	287	14219	1.81811
GOTERM_BP_ALL	GO:0052548~regulation of endopeptidase activity	3	1.02041	0.177177	UACA, BBC3, PML	218	50	14219	3.91349
GOTERM_BP_ALL	GO:0043281~regulation of caspase activity	3	1.02041	0.177177	UACA, BBC3, PML	218	50	14219	3.91349
GOTERM_BP_ALL	GO:0051336~regulation of hydrolase activity	6	2.04082	0.182269	ADAP2, UACA, BBC3, PML, ERN1, ASAP3	218	196	14219	1.99668
GOTERM_BP_ALL	GO:0052547~regulation of peptidase activity	3	1.02041	0.182664	UACA, BBC3, PML	218	51	14219	3.83675
GOTERM_BP_ALL	GO:0043085~positive regulation of catalytic activity	7	2.38095	0.211159	UACA, BBC3, TGFBR2, PML, ERN1, DGKH, GADD45B	218	261	14219	1.74932
GOTERM_BP_ALL	GO:0044093~positive regulation of molecular function	7	2.38095	0.325662	UACA, BBC3, TGFBR2, PML, ERN1, DGKH, GADD45B	218	306	14219	1.49207
Annotation Cluster 7	Enrichment Score: 1.271812276804648
Category	Term	Count	%	PValue	Genes	List Total	Pop Hits	Pop Total	Fold Enrichment
GOTERM_BP_ALL	GO:0050863~regulation of T cell activation	7	2.38095	0.00620832	IL27, TGFBR2, IL4RA, ITPKB, IL12B, IL15, CSK	218	108	14219	4.22753
GOTERM_BP_ALL	GO:0048534~hemopoietic or lymphoid organ development	11	3.7415	0.0111993	TGFBR2, IRF8, PML, BCL3, ITPKB, TTC7, IL12B, JAK3, IL15, RHOH, KDR	218	281	14219	2.55328
GOTERM_BP_ALL	GO:0030097~hemopoiesis	10	3.40136	0.015049	TGFBR2, IRF8, PML, BCL3, ITPKB, TTC7, IL12B, IL15, RHOH, KDR	218	251	14219	2.5986
GOTERM_BP_ALL	GO:0002520~immune system development	11	3.7415	0.0152978	TGFBR2, IRF8, PML, BCL3, ITPKB, TTC7, IL12B, JAK3, IL15, RHOH, KDR	218	295	14219	2.43211
GOTERM_BP_ALL	GO:0050870~positive regulation of T cell activation	5	1.70068	0.0182082	TGFBR2, IL4RA, ITPKB, IL12B, IL15	218	66	14219	4.94127
GOTERM_BP_ALL	GO:0045321~leukocyte activation	9	3.06122	0.0193198	CCND3, PIK3CD, TGFBR2, BCL3, ITPKB, NDRG1, IL12B, IL15, RHOH	218	219	14219	2.68047
GOTERM_BP_ALL	GO:0051249~regulation of lymphocyte activation	7	2.38095	0.0231237	IL27, TGFBR2, IL4RA, ITPKB, IL12B, IL15, CSK	218	144	14219	3.17065
GOTERM_BP_ALL	GO:0030217~T cell differentiation	5	1.70068	0.0288458	BCL3, ITPKB, IL12B, IL15, RHOH	218	76	14219	4.2911
GOTERM_BP_ALL	GO:0002694~regulation of leukocyte activation	7	2.38095	0.0307971	IL27, TGFBR2, IL4RA, ITPKB, IL12B, IL15, CSK	218	154	14219	2.96476
GOTERM_BP_ALL	GO:0042110~T cell activation	6	2.04082	0.0324829	CCND3, BCL3, ITPKB, IL12B, IL15, RHOH	218	116	14219	3.3737
GOTERM_BP_ALL	GO:0050865~regulation of cell activation	7	2.38095	0.0325095	IL27, TGFBR2, IL4RA, ITPKB, IL12B, IL15, CSK	218	156	14219	2.92675
GOTERM_BP_ALL	GO:0046638~positive regulation of alpha-beta T cell differentiation	3	1.02041	0.0334297	TGFBR2, IL4RA, ITPKB	218	19	14219	10.2986
GOTERM_BP_ALL	GO:0001775~cell activation	9	3.06122	0.0352922	CCND3, PIK3CD, TGFBR2, BCL3, ITPKB, NDRG1, IL12B, IL15, RHOH	218	246	14219	2.38627
GOTERM_BP_ALL	GO:0045580~regulation of T cell differentiation	4	1.36054	0.0366855	TGFBR2, IL4RA, ITPKB, IL15	218	48	14219	5.4354
GOTERM_BP_ALL	GO:0002684~positive regulation of immune system process	8	2.72109	0.0389633	C1QA, C3, TGFBR2, IL4RA, ITPKB, IL12B, IL15, H2-Q6, H2-Q7, H2-Q8, H2-Q9	218	206	14219	2.533
GOTERM_BP_ALL	GO:0046637~regulation of alpha-beta T cell differentiation	3	1.02041	0.0438373	TGFBR2, IL4RA, ITPKB	218	22	14219	8.89429
GOTERM_BP_ALL	GO:0046631~alpha-beta T cell activation	3	1.02041	0.0475403	BCL3, IL12B, IL15	218	23	14219	8.50758
GOTERM_BP_ALL	GO:0050793~regulation of developmental process	15	5.10204	0.0530569	SOCS3, IL4RA, TGFBR2, PML, ITPKB, KEAP1, IL15, RHOU, ABCG1, JUNB, NPHP3, CCND1, TULP3, JUND, SERPINE1	218	568	14219	1.72249
GOTERM_BP_ALL	GO:0051251~positive regulation of lymphocyte activation	5	1.70068	0.0556794	TGFBR2, IL4RA, ITPKB, IL12B, IL15	218	94	14219	3.4694
GOTERM_BP_ALL	GO:0045619~regulation of lymphocyte differentiation	4	1.36054	0.0586726	TGFBR2, IL4RA, ITPKB, IL15	218	58	14219	4.49826
GOTERM_BP_ALL	GO:0002682~regulation of immune system process	10	3.40136	0.0589532	C3, IL27, IL4RA, TGFBR2, ITPKB, IL15, H2-Q6, H2-Q7, H2-Q8, H2-Q9, C1QA, IL12B, CSK	218	322	14219	2.02561
GOTERM_BP_ALL	GO:0046635~positive regulation of alpha-beta T cell activation	3	1.02041	0.0592908	TGFBR2, IL4RA, ITPKB	218	26	14219	7.52594
GOTERM_BP_ALL	GO:0002696~positive regulation of leukocyte activation	5	1.70068	0.0648968	TGFBR2, IL4RA, ITPKB, IL12B, IL15	218	99	14219	3.29418
GOTERM_BP_ALL	GO:0002521~leukocyte differentiation	6	2.04082	0.0665347	TGFBR2, BCL3, ITPKB, IL12B, IL15, RHOH	218	142	14219	2.75598
GOTERM_BP_ALL	GO:0050867~positive regulation of cell activation	5	1.70068	0.0687938	TGFBR2, IL4RA, ITPKB, IL12B, IL15	218	101	14219	3.22895
GOTERM_BP_ALL	GO:0045595~regulation of cell differentiation	11	3.7415	0.072107	NPHP3, CCND1, SOCS3, JUND, TGFBR2, IL4RA, ITPKB, KEAP1, IL15, ABCG1, JUNB	218	386	14219	1.85874
GOTERM_BP_ALL	GO:0046649~lymphocyte activation	7	2.38095	0.0729686	CCND3, PIK3CD, BCL3, ITPKB, IL12B, IL15, RHOH	218	191	14219	2.39044
GOTERM_BP_ALL	GO:0045582~positive regulation of T cell differentiation	3	1.02041	0.0853228	TGFBR2, IL4RA, ITPKB	218	32	14219	6.11482
GOTERM_BP_ALL	GO:0046634~regulation of alpha-beta T cell activation	3	1.02041	0.0946423	TGFBR2, IL4RA, ITPKB	218	34	14219	5.75513
GOTERM_BP_ALL	GO:0045621~positive regulation of lymphocyte differentiation	3	1.02041	0.0946423	TGFBR2, IL4RA, ITPKB	218	34	14219	5.75513
GOTERM_BP_ALL	GO:0030098~lymphocyte differentiation	5	1.70068	0.0969415	BCL3, ITPKB, IL12B, IL15, RHOH	218	114	14219	2.86074
GOTERM_BP_ALL	GO:0045597~positive regulation of cell differentiation	6	2.04082	0.130506	SOCS3, JUND, TGFBR2, IL4RA, ITPKB, JUNB	218	175	14219	2.23628
GOTERM_BP_ALL	GO:0042129~regulation of T cell proliferation	3	1.02041	0.227292	IL27, IL12B, IL15	218	59	14219	3.31651
GOTERM_BP_ALL	GO:0051094~positive regulation of developmental process	6	2.04082	0.230154	SOCS3, JUND, TGFBR2, IL4RA, ITPKB, JUNB	218	214	14219	1.82873
GOTERM_BP_ALL	GO:0032944~regulation of mononuclear cell proliferation	3	1.02041	0.345732	IL27, IL12B, IL15	218	80	14219	2.44593
GOTERM_BP_ALL	GO:0050670~regulation of lymphocyte proliferation	3	1.02041	0.345732	IL27, IL12B, IL15	218	80	14219	2.44593
GOTERM_BP_ALL	GO:0070663~regulation of leukocyte proliferation	3	1.02041	0.356809	IL27, IL12B, IL15	218	82	14219	2.38627
Annotation Cluster 8	Enrichment Score: 1.2188381871921934
Category	Term	Count	%	PValue	Genes	List Total	Pop Hits	Pop Total	Fold Enrichment
GOTERM_BP_ALL	GO:0030308~negative regulation of cell growth	4	1.36054	0.0347722	BBC3, SERTAD3, PML, SERTAD1	218	47	14219	5.55104
GOTERM_BP_ALL	GO:0032535~regulation of cellular component size	7	2.38095	0.0371637	LIMA1, BBC3, SERTAD3, PML, EPB4.9, VILL, SERTAD1	218	161	14219	2.83586
GOTERM_BP_ALL	GO:0040008~regulation of growth	9	3.06122	0.0429956	BBC3, SOCS3, SOCS1, TGFBR2, SERTAD3, PML, HMGA2, SERTAD1, IGFBP4	218	256	14219	2.29306
GOTERM_BP_ALL	GO:0045792~negative regulation of cell size	4	1.36054	0.0470403	BBC3, SERTAD3, PML, SERTAD1	218	53	14219	4.92262
GOTERM_BP_ALL	GO:0001558~regulation of cell growth	5	1.70068	0.052205	BBC3, SERTAD3, PML, SERTAD1, IGFBP4	218	92	14219	3.54482
GOTERM_BP_ALL	GO:0045926~negative regulation of growth	4	1.36054	0.0944216	BBC3, SERTAD3, PML, SERTAD1	218	71	14219	3.67463
GOTERM_BP_ALL	GO:0008361~regulation of cell size	4	1.36054	0.228088	BBC3, SERTAD3, PML, SERTAD1	218	108	14219	2.41573
Annotation Cluster 9	Enrichment Score: 1.2007918556445971
Category	Term	Count	%	PValue	Genes	List Total	Pop Hits	Pop Total	Fold Enrichment
GOTERM_BP_ALL	GO:0048522~positive regulation of cellular process	39	13.2653	9.50143e-05	THRA, C3, IL4RA, PML, ITPKB, IL15, TLR9, CXCL10, SOS1, JUND, SERTAD3, BCL3, FBXO4, POU3F1, FAM129A, NFATC2, SERTAD1, RUNX3, FGFBP3, CEBPB, SOCS3, TGFBR2, NPR1, ARNTL, HMGA1, JUNB, KDR, DAPK1, TRIM35, UACA, NUPR1, ADM, BBC3, IRF8, ERN1, HBEGF, PPP1R13B, IL12B, JAK3	218	1320	14219	1.9271
GOTERM_BP_ALL	GO:0048518~positive regulation of biological process	42	14.2857	0.000136455	THRA, C3, IL4RA, PML, ITPKB, IL15, TLR9, CXCL10, SOS1, JUND, SERTAD3, BCL3, FBXO4, POU3F1, FAM129A, NFATC2, SERTAD1, RUNX3, FGFBP3, CEBPB, SOCS3, TGFBR2, NPR1, ARNTL, H2-Q6, HMGA1, H2-Q7, JUNB, H2-Q8, ABCG1, KDR, H2-Q9, DAPK1, C1QA, TRIM35, UACA, NUPR1, ADM, BBC3, IRF8, ERN1, HBEGF, PPP1R13B, IL12B, JAK3	218	1493	14219	1.83486
GOTERM_BP_ALL	GO:0009891~positive regulation of biosynthetic process	15	5.10204	0.0466987	THRA, CEBPB, NPR1, ARNTL, HMGA1, ABCG1, TLR9, IRF8, SERTAD3, BCL3, JAK3, POU3F1, NFATC2, FAM129A, SERTAD1	218	557	14219	1.7565
GOTERM_BP_ALL	GO:0009893~positive regulation of metabolic process	17	5.78231	0.0588635	THRA, CEBPB, PML, NPR1, ARNTL, HMGA1, ABCG1, TLR9, IRF8, SERTAD3, BCL3, FBXO4, JAK3, POU3F1, NFATC2, FAM129A, SERTAD1	218	683	14219	1.62346
GOTERM_BP_ALL	GO:0031325~positive regulation of cellular metabolic process	16	5.44218	0.0686293	THRA, CEBPB, PML, NPR1, ARNTL, HMGA1, TLR9, IRF8, SERTAD3, BCL3, FBXO4, JAK3, POU3F1, NFATC2, FAM129A, SERTAD1	218	644	14219	1.62049
GOTERM_BP_ALL	GO:0031328~positive regulation of cellular biosynthetic process	14	4.7619	0.0801373	THRA, CEBPB, NPR1, ARNTL, HMGA1, TLR9, IRF8, SERTAD3, BCL3, JAK3, POU3F1, NFATC2, FAM129A, SERTAD1	218	552	14219	1.65425
GOTERM_BP_ALL	GO:0010604~positive regulation of macromolecule metabolic process	15	5.10204	0.105392	THRA, CEBPB, PML, ARNTL, HMGA1, TLR9, IRF8, SERTAD3, BCL3, FBXO4, JAK3, POU3F1, NFATC2, FAM129A, SERTAD1	218	633	14219	1.54561
GOTERM_BP_ALL	GO:0010557~positive regulation of macromolecule biosynthetic process	13	4.42177	0.112551	THRA, CEBPB, IRF8, SERTAD3, BCL3, ARNTL, POU3F1, JAK3, FAM129A, NFATC2, HMGA1, SERTAD1, TLR9	218	530	14219	1.59985
GOTERM_BP_ALL	GO:0045935~positive regulation of nucleobase, nucleoside, nucleotide and nucleic acid metabolic process	12	4.08163	0.156851	THRA, CEBPB, IRF8, SERTAD3, BCL3, NPR1, POU3F1, JAK3, ARNTL, NFATC2, HMGA1, SERTAD1	218	510	14219	1.5347
GOTERM_BP_ALL	GO:0051173~positive regulation of nitrogen compound metabolic process	12	4.08163	0.181526	THRA, CEBPB, IRF8, SERTAD3, BCL3, NPR1, POU3F1, JAK3, ARNTL, NFATC2, HMGA1, SERTAD1	218	526	14219	1.48802
GOTERM_BP_ALL	GO:0045941~positive regulation of transcription	11	3.7415	0.191035	THRA, CEBPB, IRF8, SERTAD3, BCL3, POU3F1, JAK3, ARNTL, NFATC2, HMGA1, SERTAD1	218	475	14219	1.51047
GOTERM_BP_ALL	GO:0010628~positive regulation of gene expression	11	3.7415	0.213583	THRA, CEBPB, IRF8, SERTAD3, BCL3, POU3F1, JAK3, ARNTL, NFATC2, HMGA1, SERTAD1	218	488	14219	1.47023
GOTERM_BP_ALL	GO:0006357~regulation of transcription from RNA polymerase II promoter	13	4.42177	0.232413	THRA, CEBPB, TIMELESS, BCL3, SKI, ARNTL, POU3F1, JAK3, ZFPM1, TBL1X, MXI1, NFATC2, ETV3	218	616	14219	1.3765
GOTERM_BP_ALL	GO:0045893~positive regulation of transcription, DNA-dependent	8	2.72109	0.451885	THRA, CEBPB, IRF8, BCL3, POU3F1, JAK3, ARNTL, NFATC2	218	416	14219	1.25432
GOTERM_BP_ALL	GO:0051254~positive regulation of RNA metabolic process	8	2.72109	0.458622	THRA, CEBPB, IRF8, BCL3, POU3F1, JAK3, ARNTL, NFATC2	218	419	14219	1.24534
GOTERM_BP_ALL	GO:0045944~positive regulation of transcription from RNA polymerase II promoter	7	2.38095	0.471027	THRA, CEBPB, BCL3, POU3F1, JAK3, ARNTL, NFATC2	218	358	14219	1.27534
Annotation Cluster 10	Enrichment Score: 1.1793492051158616
Category	Term	Count	%	PValue	Genes	List Total	Pop Hits	Pop Total	Fold Enrichment
GOTERM_BP_ALL	GO:0050794~regulation of cellular process	110	37.415	0.03156	THRA, ITPKB, IL15, MXI1, TLR9, CXCL10, PDE4A, MAP3K8, SERPINE1, RAPGEF5, BCL2L14, SOCS3, IL27, SOCS1, PIK3CD, SIPA1L2, ARNTL, TRERF1, JUNB, TRIM35, TIMELESS, NEURL2, KEAP1, ASAP3, NPHP3, P2RY6, LHX2, JUND, FBXO4, FGL2, RAP1GAP2, RUNX3, IQSEC2, TGFBR2, SKI, ABCG1, KDR, TULP3, ADAP2, UACA, BBC3, EPB4.9, POU6F1, LIMA1, RHOU, SLFN1, VILL, SERTAD3, NR2F6, LRRFIP1, XCR1, FAM129A, CSK, SERTAD1, RHOH, BA…	218	6224	14219	1.15275
GOTERM_BP_ALL	GO:0050789~regulation of biological process	113	38.4354	0.0549466	THRA, ITPKB, IL15, MXI1, TLR9, CXCL10, KDM1B, PDE4A, MAP3K8, SERPINE1, RAPGEF5, BCL2L14, SOCS3, IL27, PIK3CD, SOCS1, SIPA1L2, ARNTL, TRERF1, JUNB, C1QA, TRIM35, TIMELESS, NEURL2, KEAP1, ASAP3, NPHP3, P2RY6, LHX2, JUND, FBXO4, FGL2, RAP1GAP2, RUNX3, IQSEC2, TGFBR2, SKI, H2-Q6, H2-Q7, H2-Q8, ABCG1, H2-Q9, KDR, TULP3, UACA, ADAP2, BBC3, EPB4.9, POU6F1, LIMA1, RHOU, SLFN1, VILL, SERTAD3, NR2F6, LRRFI…	218	6542	14219	1.12663
GOTERM_BP_ALL	GO:0065007~biological regulation	118	40.1361	0.0634738	THRA, ITPKB, IL15, MXI1, TLR9, CXCL10, KDM1B, GOT1, PDE4A, MAP3K8, SERPINE1, RAPGEF5, SLC12A7, BCL2L14, SOCS3, IL27, PIK3CD, SOCS1, SIPA1L2, ARNTL, TRERF1, JUNB, C1QA, TRIM35, TIMELESS, NEURL2, KEAP1, TTC7, ASAP3, ATP6V0C, NPHP3, P2RY6, LHX2, JUND, FBXO4, FGL2, RAP1GAP2, RUNX3, IQSEC2, SCD2, TGFBR2, SKI, H2-Q6, H2-Q7, H2-Q8, ABCG1, H2-Q9, KDR, TULP3, UACA, ADAP2, BBC3, EPB4.9, POU6F1, LIMA1, RHOU…	218	6903	14219	1.11495
GOTERM_BP_ALL	GO:0031323~regulation of cellular metabolic process	52	17.6871	0.0865395	POU6F1, THRA, MXI1, TLR9, NR2F6, SERTAD3, LRRFIP1, FAM129A, SERTAD1, BATF3, SOCS3, SOCS1, ARID5A, TLE3, ARNTL, MXD1, HMGA2, HMGA1, TRERF1, JUNB, TIMELESS, ERN1, ZFPM1, GADD45B, CARHSP1, PML, KEAP1, ZFP36L1, CHD9, NR1D1, NR1D2, LHX2, JUND, BCL3, ZFP219, FBXO4, POU3F1, NFATC2, RUNX3, ETV3, CEBPB, TGFBR2, NPR1, SKI, DGKH, ABCG1, IRF7, IRF8, JAK3, TBL1X, SCAND1, ZBTB8A	218	2786	14219	1.2174
GOTERM_BP_ALL	GO:0019222~regulation of metabolic process	53	18.0272	0.133158	POU6F1, THRA, MXI1, TLR9, KDM1B, NR2F6, SERTAD3, LRRFIP1, FAM129A, SERTAD1, BATF3, SOCS3, SOCS1, ARID5A, TLE3, ARNTL, MXD1, HMGA2, HMGA1, TRERF1, JUNB, TIMELESS, ERN1, ZFPM1, GADD45B, CARHSP1, PML, KEAP1, ZFP36L1, CHD9, NR1D1, NR1D2, LHX2, JUND, BCL3, ZFP219, FBXO4, POU3F1, NFATC2, RUNX3, ETV3, CEBPB, TGFBR2, NPR1, SKI, DGKH, ABCG1, IRF7, IRF8, JAK3, TBL1X, SCAND1, ZBTB8A	218	2942	14219	1.17502
Genes more highly expressed in M-BKO BMDMs vs WT following 8 h M1 activation (419 genes, p<0.05, FDR<0.05)
Annotation Cluster 1	Enrichment Score: 4.638667934910587
Category	Term	Count	%	PValue	Genes	List Total	Pop Hits	Pop Total	Fold Enrichment
GOTERM_BP_ALL	GO:0009605~response to external stimulus	39	9.75	2.4481e-08	S100A8, CCR1, CXCL3, S100A9, TLR1, CXCL2, FPR1, GJA1, PF4, FPR2, TLR8, TRF, CCL6, RB1CC1, MTPN, CFH, IL1B, MKKS, IL1A, F10, LIPA, C5AR1, PLEK, SLC12A2, TLR13, TRPA1, SAA3, CHI3L3, F7, MMP13, SIRT1, NPY, STAB1, SLC7A2, CX3CR1, PLA2G7, CLEC7A, CP, PROS1	314	640	14219	2.75946
GOTERM_BP_ALL	GO:0009611~response to wounding	24	6	2.67541e-06	F10, LIPA, PLEK, CCR1, CXCL3, TLR13, TLR1, CXCL2, SAA3, GJA1, CHI3L3, PF4, F7, TLR8, TRF, SLC7A2, STAB1, MTPN, CFH, PLA2G7, IL1B, CLEC7A, PROS1, IL1A	314	347	14219	3.132
GOTERM_BP_ALL	GO:0006950~response to stress	49	12.25	2.53283e-05	CAV1, GCLC, CCR1, CXCL3, TLR1, MORF4L2, CXCL2, GJA1, PF4, TLR8, TRF, CRY2, RB1CC1, MTPN, CFH, IL1B, CRY1, MYOF, IL1A, TRIP13, ESCO1, SGK1, C5AR1, LIPA, F10, PLEK, SLC12A2, USP1, TLR13, TRPA1, SAA3, SMC6, CHI3L3, MALT1, F7, MMP13, SIRT1, HSP90B1, EYA1, FCGR2B, STAB1, PRDX6, SLC7A2, PLA2G7, CLEC7A, PROS1, PLAU, RAD17, REV3L	314	1184	14219	1.87406
GOTERM_BP_ALL	GO:0006954~inflammatory response	17	4.25	3.91857e-05	LIPA, CXCL3, CCR1, TLR13, CXCL2, TLR1, SAA3, CHI3L3, TLR8, TRF, SLC7A2, STAB1, PLA2G7, CFH, IL1B, CLEC7A, IL1A	314	225	14219	3.42142
GOTERM_BP_ALL	GO:0050896~response to stimulus	78	19.5	0.000449224	S100A4, GDF3, S100A8, HPRT, CAPZA2, TLR1, MORF4L2, S100A9, GJA1, HVCN1, TLR8, PRKAR2B, CRY2, CLEC4E, CFH, MKKS, IL1B, CLEC4A2, CLEC4D, SEPP1, CRY1, IL1A, ESCO1, SGK1, C5AR1, F10, USP1, TRPA1, SAA3, F7, MMP13, CLEC4N, EYA1, PRDX6, CX3CR1, PLA2G7, ADAM17, PROS1, CLEC5A, RAD17, REV3L, CAV1, GCLC, CCR1, CXCL3, CXCL2, FPR1, HIATL1, PF4, FPR2, IL7R, TRF, CCL6, IRAK3, RB1CC1, MTPN, MYOF, APBA1, TRIP13, …	314	2437	14219	1.44937
GOTERM_BP_ALL	GO:0006952~defense response	20	5	0.0050417	C5AR1, LIPA, CCR1, CXCL3, TLR13, TLR1, CXCL2, SAA3, CHI3L3, MALT1, TLR8, TRF, FCGR2B, SLC7A2, STAB1, CFH, PLA2G7, IL1B, CLEC7A, IL1A	314	448	14219	2.02158
Annotation Cluster 2	Enrichment Score: 3.6478726427532395
Category	Term	Count	%	PValue	Genes	List Total	Pop Hits	Pop Total	Fold Enrichment
GOTERM_BP_ALL	GO:0060326~cell chemotaxis	8	2	1.42445e-06	C5AR1, CXCL3, CCR1, CXCL2, S100A9, CX3CR1, IL1B, PF4	314	27	14219	13.4173
GOTERM_BP_ALL	GO:0030595~leukocyte chemotaxis	8	2	1.42445e-06	C5AR1, CXCL3, CCR1, CXCL2, S100A9, CX3CR1, IL1B, PF4	314	27	14219	13.4173
GOTERM_BP_ALL	GO:0042330~taxis	12	3	2.78025e-05	C5AR1, S100A8, CXCL3, CCR1, CXCL2, S100A9, CX3CR1, FPR1, IL1B, PF4, FPR2, CCL6	314	109	14219	4.98533
GOTERM_BP_ALL	GO:0006935~chemotaxis	12	3	2.78025e-05	C5AR1, S100A8, CXCL3, CCR1, CXCL2, S100A9, CX3CR1, FPR1, IL1B, PF4, FPR2, CCL6	314	109	14219	4.98533
GOTERM_BP_ALL	GO:0050900~leukocyte migration	8	2	3.82109e-05	C5AR1, CXCL3, CCR1, CXCL2, S100A9, CX3CR1, IL1B, PF4	314	43	14219	8.42483
GOTERM_BP_ALL	GO:0040011~locomotion	21	5.25	0.000167845	C5AR1, S100A8, CCR1, CXCL3, CAPZA2, S100A9, MET, CXCL2, FPR1, GJA1, PF4, FPR2, ITGA4, KITL, CCL6, EDNRB, CX3CR1, IL1B, ADAM17, TOP2B, PLAU	314	364	14219	2.61251
GOTERM_BP_ALL	GO:0016477~cell migration	16	4	0.000284851	C5AR1, CXCL3, CAPZA2, CCR1, MET, CXCL2, S100A9, GJA1, PF4, ITGA4, KITL, EDNRB, CX3CR1, IL1B, TOP2B, PLAU	314	240	14219	3.0189
GOTERM_BP_ALL	GO:0048870~cell motility	17	4.25	0.000568841	C5AR1, CXCL3, CAPZA2, CCR1, MET, CXCL2, S100A9, GJA1, PF4, ITGA4, KITL, EDNRB, CX3CR1, IL1B, ADAM17, TOP2B, PLAU	314	284	14219	2.71063
GOTERM_BP_ALL	GO:0051674~localization of cell	17	4.25	0.000568841	C5AR1, CXCL3, CAPZA2, CCR1, MET, CXCL2, S100A9, GJA1, PF4, ITGA4, KITL, EDNRB, CX3CR1, IL1B, ADAM17, TOP2B, PLAU	314	284	14219	2.71063
GOTERM_BP_ALL	GO:0006928~cell motion	19	4.75	0.00131961	C5AR1, PDPN, CXCL3, CAPZA2, CCR1, S100A9, MET, CXCL2, GJA1, PF4, ITGA4, KITL, MYCBP2, EDNRB, CX3CR1, IL1B, ADAM17, TOP2B, PLAU	314	367	14219	2.34437
GOTERM_BP_ALL	GO:0007626~locomotory behavior	14	3.5	0.00249899	C5AR1, S100A8, CCR1, CXCL3, S100A9, CX3CR1, CXCL2, FPR1, IL1B, PF4, FPR2, SEPP1, APBA1, CCL6	314	239	14219	2.65259
GOTERM_BP_ALL	GO:0007610~behavior	19	4.75	0.00383849	C5AR1, S100A8, HPRT, CCR1, CXCL3, S100A9, MET, CXCL2, FPR1, PF4, FPR2, CCL6, PRKAR2B, NPY, CX3CR1, MKKS, IL1B, SEPP1, APBA1	314	405	14219	2.12441
GOTERM_BP_ALL	GO:0030593~neutrophil chemotaxis	4	1	0.0057134	C5AR1, CXCL3, CXCL2, IL1B	314	17	14219	10.6549
GOTERM_BP_ALL	GO:0042221~response to chemical stimulus	31	7.75	0.012687	S100A4, CAV1, GCLC, HPRT, S100A8, CCR1, CAPZA2, CXCL3, S100A9, CXCL2, TLR1, FPR1, HIATL1, PF4, FPR2, HVCN1, TRF, CCL6, IRAK3, IL1B, SGK1, C5AR1, MAT2A, TRPA1, MALT1, MMP13, PRDX6, CX3CR1, ADAM17, CLEC7A, CP, PLAU	314	887	14219	1.58262
Annotation Cluster 3	Enrichment Score: 2.4544176263081474
Category	Term	Count	%	PValue	Genes	List Total	Pop Hits	Pop Total	Fold Enrichment
GOTERM_BP_ALL	GO:0006955~immune response	22	5.5	0.00176874	CXCL3, TLR13, TLR1, CXCL2, MALT1, PF4, IL7R, TLR8, CLEC4N, CCL6, CBLB, FCGR2B, CLEC4E, CX3CR1, CFH, IL1B, ADAM17, CLEC4A2, CLEC4D, CLEC7A, CLEC5A, IL1A	314	471	14219	2.11515
GOTERM_BP_ALL	GO:0002376~immune system process	30	7.5	0.00485854	HPRT, CXCL3, CCR1, CD247, S100A9, CXCL2, TLR1, PF4, SFXN1, IL7R, TLR8, CCL6, CLEC4E, CFH, IL1B, CLEC4A2, CLEC4D, IL1A, C5AR1, TLR13, MALT1, CLEC4N, CBLB, FCGR2B, SLC7A2, CX3CR1, ADAM17, HSPD1, CLEC7A, CLEC5A	314	791	14219	1.71745
GOTERM_BP_ALL	GO:0006952~defense response	20	5	0.0050417	C5AR1, LIPA, CCR1, CXCL3, TLR13, TLR1, CXCL2, SAA3, CHI3L3, MALT1, TLR8, TRF, FCGR2B, SLC7A2, STAB1, CFH, PLA2G7, IL1B, CLEC7A, IL1A	314	448	14219	2.02158
Annotation Cluster 4	Enrichment Score: 2.039655994895138
Category	Term	Count	%	PValue	Genes	List Total	Pop Hits	Pop Total	Fold Enrichment
GOTERM_BP_ALL	GO:0010744~positive regulation of foam cell differentiation	3	0.75	0.00142801	LPL, CD36, MSR1	314	3	14219	45.2834
GOTERM_BP_ALL	GO:0010743~regulation of foam cell differentiation	3	0.75	0.00281445	LPL, CD36, MSR1	314	4	14219	33.9626
GOTERM_BP_ALL	GO:0045597~positive regulation of cell differentiation	7	1.75	0.189193	LPL, CD36, MSR1, BTG1, JAG1, IL7R, KITL	314	175	14219	1.81134
Annotation Cluster 5	Enrichment Score: 1.9049958557975375
Category	Term	Count	%	PValue	Genes	List Total	Pop Hits	Pop Total	Fold Enrichment
GOTERM_BP_ALL	GO:0006865~amino acid transport	7	1.75	0.00468003	SLC38A2, PDPN, SLC7A2, SERINC1, SLC7A8, APBA1, SLC7A11	314	71	14219	4.46456
GOTERM_BP_ALL	GO:0015807~L-amino acid transport	4	1	0.00788157	SLC7A2, SERINC1, SLC7A8, APBA1	314	19	14219	9.53336
GOTERM_BP_ALL	GO:0015837~amine transport	7	1.75	0.0159222	SLC38A2, PDPN, SLC7A2, SERINC1, SLC7A8, APBA1, SLC7A11	314	92	14219	3.44548
GOTERM_BP_ALL	GO:0046942~carboxylic acid transport	7	1.75	0.0220569	SLC38A2, PDPN, SLC7A2, SERINC1, SLC7A8, APBA1, SLC7A11	314	99	14219	3.20186
GOTERM_BP_ALL	GO:0015849~organic acid transport	7	1.75	0.0230469	SLC38A2, PDPN, SLC7A2, SERINC1, SLC7A8, APBA1, SLC7A11	314	100	14219	3.16984
Annotation Cluster 6	Enrichment Score: 1.454178407409054\
Category	Term	Count	%	PValue	Genes	List Total	Pop Hits	Pop Total	Fold Enrichment
GOTERM_BP_ALL	GO:0051179~localization	80	20	0.00231122	S100A4, MSR1, SLC20A1, SLC16A10, CAPZA2, S100A9, SLC7A8, GJA1, CLTC, HVCN1, HOOK3, EDNRB, CRY2, IL1B, TOP2B, C5AR1, PDPN, PGAP1, TRPA1, MFGE8, SLC7A11, WDR92, CD36, IPO7, SLC41A2, CX3CR1, SH3KBP1, ADAM17, SLC25A37, SLC40A1, EIF5A2, VPS26A, CAV2, CAV1, SLC38A2, MMGT1, UBE3A, SNX14, CCR1, CXCL3, CXCL2, HIATL1, SFXN1, PF4, CHCHD4, KCNJ2, TRF, SLC48A1, TMED5, SERINC1, NPM1, SLC25A46, SLC4A7, VPS35, E…	314	2659	14219	1.36242
GOTERM_BP_ALL	GO:0006810~transport	63	15.75	0.0651697	S100A4, MSR1, SLC20A1, SLC16A10, CAPZA2, SLC7A8, CLTC, HVCN1, HOOK3, CRY2, PDPN, PGAP1, TRPA1, MFGE8, SLC7A11, CD36, IPO7, SLC41A2, SH3KBP1, SLC25A37, SLC40A1, EIF5A2, VPS26A, CAV2, CAV1, SLC38A2, MMGT1, SNX14, UBE3A, HIATL1, SFXN1, CHCHD4, KCNJ2, TRF, SLC48A1, TMED5, SERINC1, NPM1, SLC25A46, SLC4A7, VPS35, EXOC5, TRAM1, SLC31A1, APBA1, SLC8A1, OSBPL3, SLC12A2, PLEK, ATP11C, ATP13A3, LCN2, RAB32,…	314	2342	14219	1.21813
GOTERM_BP_ALL	GO:0051234~establishment of localization	63	15.75	0.0725384	S100A4, MSR1, SLC20A1, SLC16A10, CAPZA2, SLC7A8, CLTC, HVCN1, HOOK3, CRY2, PDPN, PGAP1, TRPA1, MFGE8, SLC7A11, CD36, IPO7, SLC41A2, SH3KBP1, SLC25A37, SLC40A1, EIF5A2, VPS26A, CAV2, CAV1, SLC38A2, MMGT1, SNX14, UBE3A, HIATL1, SFXN1, CHCHD4, KCNJ2, TRF, SLC48A1, TMED5, SERINC1, NPM1, SLC25A46, SLC4A7, VPS35, EXOC5, TRAM1, SLC31A1, APBA1, SLC8A1, OSBPL3, SLC12A2, PLEK, ATP11C, ATP13A3, LCN2, RAB32,…	314	2358	14219	1.20986
GOTERM_BP_ALL	GO:0033036~macromolecule localization	26	6.5	0.139583	CAV1, MSR1, SNX14, CHCHD4, CLTC, HOOK3, CRY2, NPM1, VPS35, EXOC5, TRAM1, APBA1, OSBPL3, PLEK, PGAP1, ATP11C, WDR92, RAB32, CD36, IPO7, RAB1, NOP58, GGA2, VPS26A, EIF5A2, SSR3	314	902	14219	1.30529
Annotation Cluster 7	Enrichment Score: 1.2993615540337002\
Category	Term	Count	%	PValue	Genes	List Total	Pop Hits	Pop Total	Fold Enrichment
GOTERM_BP_ALL	GO:0006508~proteolysis	34	8.5	0.0199597	UBE3A, UBA6, ANAPC10, HP, MYCBP2, CUL3, TPP2, RNF128, CFH, LONRF3, CLEC4A3, CAPN7, F10, USP1, MALT1, F7, UBE2Q2, MID1, MMP13, MMP12, RFWD2, MARCH1, UBE2E3, CBLB, DCUN1D1, HSP90B1, SPCS3, FBXO30, FBXL5, ADAM17, CTSC, ADAM19, CPD, PLAU	314	1034	14219	1.48901
GOTERM_BP_ALL	GO:0051603~proteolysis involved in cellular protein catabolic process	20	5	0.0275546	UBE3A, USP1, UBA6, ANAPC10, MALT1, UBE2Q2, MID1, MYCBP2, MARCH1, CUL3, RFWD2, UBE2E3, DCUN1D1, CBLB, HSP90B1, RNF128, FBXL5, FBXO30, ADAM17, ADAM19	314	534	14219	1.69601
GOTERM_BP_ALL	GO:0044257~cellular protein catabolic process	20	5	0.0287712	UBE3A, USP1, UBA6, ANAPC10, MALT1, UBE2Q2, MID1, MYCBP2, MARCH1, CUL3, RFWD2, UBE2E3, DCUN1D1, CBLB, HSP90B1, RNF128, FBXL5, FBXO30, ADAM17, ADAM19	314	537	14219	1.68653
GOTERM_BP_ALL	GO:0030163~protein catabolic process	20	5	0.0388909	UBE3A, USP1, UBA6, ANAPC10, MALT1, UBE2Q2, MID1, MYCBP2, MARCH1, CUL3, RFWD2, UBE2E3, DCUN1D1, CBLB, HSP90B1, RNF128, FBXL5, FBXO30, ADAM17, ADAM19	314	556	14219	1.6289
GOTERM_BP_ALL	GO:0044265~cellular macromolecule catabolic process	21	5.25	0.0490548	UBE3A, USP1, UBA6, ANAPC10, MALT1, UBE2Q2, MID1, MYCBP2, MARCH1, CUL3, RFWD2, UBE2E3, DCUN1D1, CBLB, HSP90B1, CD36, RNF128, FBXL5, FBXO30, ADAM17, ADAM19	314	609	14219	1.5615
GOTERM_BP_ALL	GO:0009057~macromolecule catabolic process	22	5.5	0.0529604	UBE3A, USP1, UBA6, ANAPC10, MALT1, CHI3L3, UBE2Q2, MID1, MYCBP2, MARCH1, RFWD2, CUL3, UBE2E3, DCUN1D1, CBLB, HSP90B1, CD36, RNF128, FBXL5, FBXO30, ADAM17, ADAM19	314	654	14219	1.5233
GOTERM_BP_ALL	GO:0043632~modification-dependent macromolecule catabolic process	18	4.5	0.0571662	UBE3A, USP1, UBA6, ANAPC10, MALT1, UBE2Q2, MID1, MYCBP2, MARCH1, CUL3, RFWD2, UBE2E3, DCUN1D1, CBLB, HSP90B1, RNF128, FBXL5, FBXO30	314	508	14219	1.60453
GOTERM_BP_ALL	GO:0019941~modification-dependent protein catabolic process	18	4.5	0.0571662	UBE3A, USP1, UBA6, ANAPC10, MALT1, UBE2Q2, MID1, MYCBP2, MARCH1, CUL3, RFWD2, UBE2E3, DCUN1D1, CBLB, HSP90B1, RNF128, FBXL5, FBXO30	314	508	14219	1.60453
GOTERM_BP_ALL	GO:0044248~cellular catabolic process	25	6.25	0.122906	LPL, UBE3A, USP1, UBA6, ANAPC10, MALT1, UBE2Q2, MID1, MYCBP2, MARCH1, RFWD2, CUL3, UBE2E3, DCUN1D1, CBLB, HSP90B1, PLA2G4A, CD36, SMPDL3A, RB1CC1, RNF128, FBXL5, FBXO30, ADAM17, ADAM19	314	848	14219	1.33501
GOTERM_BP_ALL	GO:0009056~catabolic process	29	7.25	0.158032	UBE3A, UBA6, ANAPC10, MYCBP2, CUL3, SMPDL3A, RB1CC1, RNF128, LPL, LIPA, USP1, MALT1, CHI3L3, UBE2Q2, MID1, RFWD2, MARCH1, UBE2E3, CBLB, DCUN1D1, HSP90B1, PLA2G4A, CD36, PRDX6, PLA2G7, FBXL5, FBXO30, ADAM17, ADAM19	314	1040	14219	1.26271
Annotation Cluster 8	Enrichment Score: 1.2790667044122919\
Category	Term	Count	%	PValue	Genes	List Total	Pop Hits	Pop Total	Fold Enrichment
GOTERM_BP_ALL	GO:0006897~endocytosis	10	2.5	0.0234901	CAV2, CAV1, CD36, MSR1, TFRC, FCGR2B, UBE3A, SH3KBP1, MFGE8, CLEC7A	314	188	14219	2.40869
GOTERM_BP_ALL	GO:0010324~membrane invagination	10	2.5	0.0234901	CAV2, CAV1, CD36, MSR1, TFRC, FCGR2B, UBE3A, SH3KBP1, MFGE8, CLEC7A	314	188	14219	2.40869
GOTERM_BP_ALL	GO:0016192~vesicle-mediated transport	17	4.25	0.0533918	CAV2, CAV1, MSR1, PLEK, UBE3A, MFGE8, CLTC, HOOK3, CD36, TFRC, FCGR2B, RAB1, SH3KBP1, CLEC7A, EXOC5, VPS26A, GGA2	314	466	14219	1.65197
GOTERM_BP_ALL	GO:0006909~phagocytosis	4	1	0.0929481	CD36, FCGR2B, MFGE8, CLEC7A	314	49	14219	3.69661
GOTERM_BP_ALL	GO:0016044~membrane organization	10	2.5	0.146954	CAV2, CAV1, CD36, MSR1, TFRC, FCGR2B, UBE3A, SH3KBP1, MFGE8, CLEC7A	314	272	14219	1.66483
Annotation Cluster 9	Enrichment Score: 1.2739007181872233\
Category	Term	Count	%	PValue	Genes	List Total	Pop Hits	Pop Total	Fold Enrichment
GOTERM_BP_ALL	GO:0051130~positive regulation of cellular component organization	9	2.25	0.00555487	SIRPB1A, CAV1, PLEK, FCGR2B, LOC100038947, CAPZA2, NPM1, MFGE8, CLEC7A, EIF5A2	314	122	14219	3.34058
GOTERM_BP_ALL	GO:0050766~positive regulation of phagocytosis	4	1	0.0135024	SIRPB1A, FCGR2B, LOC100038947, MFGE8, CLEC7A	314	23	14219	7.87538
GOTERM_BP_ALL	GO:0050764~regulation of phagocytosis	4	1	0.0169794	SIRPB1A, FCGR2B, LOC100038947, MFGE8, CLEC7A	314	25	14219	7.24535
GOTERM_BP_ALL	GO:0032879~regulation of localization	16	4	0.0354058	COL18A1, CAV1, SLC8A1, SGK1, MSR1, PDPN, MFGE8, MYCBP2, SIRPB1A, CD36, LOC100038947, FCGR2B, MKKS, IL1B, ADAM17, CLEC7A, DNAJC1	314	406	14219	1.78457
GOTERM_BP_ALL	GO:0045807~positive regulation of endocytosis	4	1	0.0382475	SIRPB1A, FCGR2B, LOC100038947, MFGE8, CLEC7A	314	34	14219	5.32746
GOTERM_BP_ALL	GO:0006911~phagocytosis, engulfment	3	0.75	0.0419904	FCGR2B, MFGE8, CLEC7A	314	15	14219	9.05669
GOTERM_BP_ALL	GO:0006909~phagocytosis	4	1	0.0929481	CD36, FCGR2B, MFGE8, CLEC7A	314	49	14219	3.69661
GOTERM_BP_ALL	GO:0030100~regulation of endocytosis	4	1	0.106399	SIRPB1A, FCGR2B, LOC100038947, MFGE8, CLEC7A	314	52	14219	3.48334
GOTERM_BP_ALL	GO:0051050~positive regulation of transport	6	1.5	0.1663	SIRPB1A, SGK1, CAV1, FCGR2B, LOC100038947, MFGE8, CLEC7A	314	132	14219	2.05834
GOTERM_BP_ALL	GO:0060627~regulation of vesicle-mediated transport	4	1	0.275948	SIRPB1A, FCGR2B, LOC100038947, MFGE8, CLEC7A	314	83	14219	2.18233
GOTERM_BP_ALL	GO:0051049~regulation of transport	9	2.25	0.295366	SIRPB1A, SGK1, SLC8A1, CAV1, FCGR2B, LOC100038947, IL1B, MFGE8, CLEC7A, DNAJC1	314	286	14219	1.425
Annotation Cluster 10	Enrichment Score: 1.2594813243786613\
Category	Term	Count	%	PValue	Genes	List Total	Pop Hits	Pop Total	Fold Enrichment
GOTERM_BP_ALL	GO:0000041~transition metal ion transport	7	1.75	0.00436334	MMGT1, SLC25A37, SFXN1, CP, SLC31A1, SLC40A1, TRF	314	70	14219	4.52834
GOTERM_BP_ALL	GO:0006826~iron ion transport	5	1.25	0.00509412	MMGT1, SLC25A37, SFXN1, SLC40A1, TRF	314	32	14219	7.07554
GOTERM_BP_ALL	GO:0006812~cation transport	18	4.5	0.0637056	CAV1, SLC8A1, MMGT1, SLC38A2, SLC12A2, TRPA1, SFXN1, KCNJ2, HVCN1, ATP13A3, TRF, SLC41A2, SLC4A7, SLC25A37, CP, SLC40A1, SLC31A1, KCTD12	314	515	14219	1.58272
GOTERM_BP_ALL	GO:0015674~di-, tri-valent inorganic cation transport	8	2	0.0654615	SLC8A1, CAV1, MMGT1, TRPA1, SLC25A37, SFXN1, SLC40A1, TRF	314	161	14219	2.25011
GOTERM_BP_ALL	GO:0030001~metal ion transport	15	3.75	0.109656	CAV1, SLC8A1, MMGT1, SLC38A2, SLC12A2, TRPA1, SFXN1, KCNJ2, TRF, SLC4A7, SLC25A37, CP, SLC31A1, SLC40A1, KCTD12	314	442	14219	1.53677
GOTERM_BP_ALL	GO:0006811~ion transport	20	5	0.227421	CAV1, SLC8A1, MMGT1, SLC38A2, SLC12A2, SLC20A1, CAPZA2, TRPA1, SFXN1, KCNJ2, HVCN1, ATP13A3, TRF, SLC41A2, SLC25A37, SLC4A7, CP, SLC40A1, SLC31A1, KCTD12	314	712	14219	1.27201
GOTERM_BP_ALL	GO:0015672~monovalent inorganic cation transport	7	1.75	0.660262	SLC8A1, SLC38A2, SLC12A2, SLC4A7, HVCN1, KCNJ2, KCTD12	314	303	14219	1.04615
