# Supplementary material for: Bmal1 integrates mitochondrial metabolism and macrophage activation
Source: eLife journal article supplement (doi:10.7554/elife.54090), 2020-05-12
Supplement: supp [file elife-54090-supp-v1.zip › elife_poa_e54090_Supplementary_file_1.docx]

| **Supplementary File 1: Key Resources Table** | | | | |
| --- | --- | --- | --- | --- |
| **Reagent type (species) or resource** | **Designation** | **Source or reference** | **Identifiers** | **Additional information** |
| Strain, strain background (*Mus musculus*) | B6.129S4(CG)-*Arntltm1Weit*/J | The Jackson Laboratory | JAX: 007668 | Carry loxp sites flanking exon 8 of the *Bmal1* gene |
| Strain, strain background (*Mus musculus*) | B6.129-*Hif1atm3Rsjo*/J | The Jackson Laboratory | JAX: 007561 | Carry loxp sites flanking exon 2 of the *Hif1a* gene |
| Strain, strain background (*Mus musculus*) | B6.129P2-*Lyz2tm1(cre)lfo*/J | The Jackson Laboratory | JAX: 004781 | Myeloid-specific Cre recombinase expression |
| Antibody | Mouse monoclonal anti-Bmal1 (clone B-1) | Santa Cruz Biotechnology | Cat# sc365645; RRID: AB_10841724 | WB (1:1000) |
| Antibody | Rabbit polyclonal anti-Hif-1α | Novus Biologicals | Cat# NB100-449;  RRID: AB_10001045 | WB (1:1000) |
| Antibody | Rabbit monoclonal anti-Bnip3  (clone EPR4034) | Abcam | Cat# ab109362;  RRID:  AB_10864714 | WB (1:1000) |
| Antibody | Rabbit polyclonal anti-β-Tubulin | Cell Signaling Technology | Cat# 2146;  RRID: AB_2210545 | WB (1:1000) |
| Antibody | Rabbit monoclonal anti-β-Actin (clone 13E5) | Cell Signaling Technology | Cat# 4970;  RRID: AB_2223172 | WB (1:1000) |
| Antibody | Rat monoclonal anti-CD45 (clone 30-F11), PerCP/Cy5.5-conjugated | Biolegend | Cat# 103132;  RRID: AB_893340 | Flow cytometry (1  μL per test) |
| Antibody | Armenian hamster monoclonal anti-CD3ε (clone 145-2C11), PE/Cy7-conjugated | Biolegend | Cat# 100320;  RRID: AB_312685 | Flow cytometry (2.5  μL per test) |
| Antibody | Rat monoclonal anti-CD8a (clone 53-6.7), Alexa Fluor 700-conjugated | Biolegend | Cat# 100730;  RRID: AB_493703 | Flow cytometry (0.5  μL per test) |
| Antibody | Mouse monoclonal anti-NK1.1 (clone PK136), APC-conjugated | Biolegend | Cat# 108710 | Flow cytometry (5  μL per test) |
| Antibody | Rat monoclonal anti-F4/80 (clone BM8), Alexa Fluor 488-conjugated | Biolegend | Cat# 123120;  RRID: AB_ 893479 | Flow cytometry (5  μL per test) |
| Antibody | Rat monoclonal anti-F4/80 (clone BM8), APC-conjugated | Biolegend | Cat# 123115;  RRID: AB_ 893493 | Flow cytometry (2.5  μL per test) |
| Antibody | Rat monoclonal anti-Ifn-γ (clone XMG1.2), PE-conjugated | ThermoFisher Scientific | Cat# 12-7311-81, RRID: AB_466192 | Flow cytometry (1  μL per test) |
| Peptide, recombinant protein | Recombinant murine interferon-γ | Peprotech | Cat# 315-05 | Used 10 ng/mL final concentration |
| Peptide, recombinant protein | Recombinant murine interleukin-4 | Peprotech | Cat# 214-14 | Used 10 ng/mL final concentration |
| Sequence-based reagent | 36b4_F | This paper | qPCR primer | AGATGCAGCAGATCCGCAT |
| Sequenced-based reagent | 36b4_R | This paper | qPCR primer | GTTCTTGCCCATCAGCACC |
| Sequenced-based reagent | Arg1_F | This paper | qPCR primer | CGTAGACCCTGGGGAACACTAT |
| Sequence-based reagent | Arg1_R | This paper | qPCR primer | TCCATCACCTTGCCAATCCC |
| Sequenced-based reagent | Bckdhb_F | This paper | qPCR primer | TGGGGCTCTCTACCATTCTCA |
| Sequence-based reagent | Bckdhb_R | This paper | qPCR primer | GGGGTATTACCACCTTGATCCC |
| Sequenced-based reagent | Bmal1_F | This paper | qPCR primer | AGGATCAAGAATGCAAGGGAGG |
| Sequenced-based reagent | Bmal1_R | This paper | qPCR primer | TGAAACTGTTCATTTTGTCCCGA |
| Sequence-based reagent | cMyc_F | This paper | qPCR primer | CAGCGACTCTGAAGAAGAGCA |
| Sequenced-based reagent | cMyc_R | This paper | qPCR primer | GACCTCTTGGCAGGGGTTTG |
| Sequence-based reagent | Cry1_F | This paper | qPCR primer | CACTGGTTCCGAAAGGGACTC |
| Sequenced-based reagent | Cry1_R | This paper | qPCR primer | CTGAAGCAAAAATCGCCACCT |
| Sequenced-based reagent | Gclc_F | This paper | qPCR primer | CATCCTCCAGTTCCTGCACA |
| Sequence-based reagent | Gclc_R | This paper | qPCR primer | ATGTACTCCACCTCGTCACC |
| Sequence-based reagent | Hif1a_F | This paper | qPCR primer | GAACGAGAAGAAAAATAGGATGAGT |
| Sequenced-based reagent | Hif1a_R | This paper | qPCR primer | ACTCTTTGCTTCGCCGAGAT |
| Sequenced-based reagent | Hmox1_F | This paper | qPCR primer | CAGAGCCGTCTCGAGCATAG |
| Sequence-based reagent | Hmox1_R | This paper | qPCR primer | CAAATCCTGGGGCATGCTGT |
| Sequenced-based reagent | Il1b_F | This paper | qPCR primer | AGCTTCAGGCAGGCAGTATC |
| Sequence-based reagent | Il1b_R | This paper | qPCR primer | AAGGTCCACGGGAAAGACAC |
| Sequenced-based reagent | Ldha_F | This paper | qPCR primer | GCGTCTCCCTGAAGTCTCTT |
| Sequenced-based reagent | Ldha_R | This paper | qPCR primer | GCCCAGGATGTGTAACCTTT |
| Sequence-based reagent | Mgl2_F | This paper | qPCR primer | ccttgcgtttgtcaaaacatgac |
| Sequenced-based reagent | Mgl2_R | This paper | qPCR primer | ctgaggcttatggaactgaggc |
| Sequence-based reagent | Mmsdh_F | This paper | qPCR primer | GAGGCCTTCAGGTGGTTGAG |
| Sequenced-based reagent | Mmsdh_R | This paper | qPCR primer | GATAGATGGCATGGTCTCTCCC |
| Sequenced-based reagent | Nfe2l2_F | This paper | qPCR primer | GGTTGCCCACATTCCCAAAC |
| Sequence-based reagent | Nfe2l2_R | This paper | qPCR primer | GCAAGCGACTCATGGTCATC |
| Sequenced-based reagent | Nfkb1_F | This paper | qPCR primer | CCTGCTTCTGGAGGGTGATG |
| Sequence-based reagent | Nfkb1_R | This paper | qPCR primer | GCCGCTATATGCAGAGGTGT |
| Sequenced-based reagent | Nqo1_F | This paper | qPCR primer | TCTCTGGCCGATTCAGAGTG |
| Sequence-based reagent | Nqo1_R | This paper | qPCR primer | TGCTGTAAACCAGTTGAGGTTC |
| Sequenced-based reagent | Nr1d2_F | This paper | qPCR primer | TCATGAGGATGAACAGGAACCG |
| Sequenced-based reagent | Nr1d2_R | This paper | qPCR primer | CGGCCAAATCGAACAGCATC |
| Sequence-based reagent | Ppard_F | This paper | qPCR primer | CAGCCTCAACATGGAATGTC |
| Sequenced-based reagent | Ppard_R | This paper | qPCR primer | TCCGATCGCACTTCTCATAC |
| Sequence-based reagent | Pparg_F | This paper | qPCR primer | CAGGAGCCTGTGAGACCAAC |
| Sequenced-based reagent | Pparg_R | This paper | qPCR primer | ACCGCTTCTTTCAAATCTTGTCTG |
| Sequenced-based reagent | Slc7a2_F | This paper | qPCR primer | CCCGGGATGGCTTACTGTTT |
| Sequence-based reagent | Slc7a2_R | This paper | qPCR primer | AGGCCATCACAGCAGAAATGA |
| Sequenced-based reagent | Slc7a8_F | This paper | qPCR primer | GAACCACCCGGGTTCTGAC |
| Sequence-based reagent | Slc7a8_R | This paper | qPCR primer | TGATGTTCCCTACAATGATACCACA |
| Sequenced-based reagent | Slc7a11_F | This paper | qPCR primer | ATCTCCCCCAAGGGCATACT |
| Sequenced-based reagent | Slc7a11_R | This paper | qPCR primer | GCATAGGACAGGGCTCCAAA |
| Sequence-based reagent | Stat3_F | This paper | qPCR primer | TGGCAGTTCTCGTCCAC |
| Sequenced-based reagent | Stat3_R | This paper | qPCR primer | CCAGCCATGTTTTCTTTGC |
| Sequence-based reagent | Bmal1_F | This paper | Cloning primers | GGCGAATTCGCGGACCAGAGAATGGAC |
| Sequenced-based reagent | Bmal1_R | This paper | Cloning primers | GGGCTCGAGCTACAGCGGCCATGGCAA |
| Cell line (*Mus musculus*) | RAW264.7 macrophages | ATCC | qPCR primer | TIB-71 |
| Cell line (*Mus musculus*) | B16-F10 melanoma cells | ATCC | qPCR primer | CRL-6475 |
| Recombinant DNA reagent | pBABE-puro retroviral expression vector (plasmid) | Addgene | Plasmid #1764 |  |
| Recombinant DNA reagent | pBABE-Bmal1 (plasmid) | This study |  | For stable overexpression of mouse *Bmal1* |
| Chemical compound, drug | Lipopolysaccharides from *Escherichia coli* K-235 | Sigma-Aldrich | Cat# L2143 | Final concentration used varied as indicated. |
| Chemical compound, drug | Dimethyl malonate | Sigma-Aldrich | Cat# 136441;  CAS: 108-59-8 | Used 10 mM final concentration |
| Chemical compound, drug | Sodium succinate dibasic | Sigma-Aldrich | Cat# 14160;  CAS: 150-90-3 | Used 10 mM final concentration |
| Chemical compound, drug | N-acetyl-L-cysteine | Sigma-Aldrich | Cat# A9165;  CAS: 616-91-1 | Final concentration used varied as indicated. |
| Chemical compound, drug | 2-deoxy-D-glucose | Sigma-Aldrich | Cat# D8375;  CAS: 154-17-6 | Used 50 mM final concentration |
| Chemical compound, drug | Quant-iT ribogreen RNA reagent | ThermoFisher Scientific | Cat# R11491 |  |
| Chemical compound, drug | Mitotracker green FM | ThermoFisher Scientific | Cat# M7514  CAS: 201860-17-5 | Used 100 nM final concentration |
| Chemical compound, drug | Mitosox red superoxide indicator | ThermoFisher Scientific | Cat# M36008 | Used 5 μM final concentration |
| Chemical compound, drug | 2-NBDG | ThermoFisher Scientific | Cat# N13195 | Used 10 μM final concentration |
| Chemical compound, drug | Fixable viability dye eFluor 455uv | ThermoFisher Scientific | Cat# 65-868-14 | Flow cytometry (0.5  μL per test) |
| Chemical compound, drug | Fixable viability dye eFluor 506 | ThermoFisher Scientific | Cat# 65-0866-14 | Flow cytometry (0.5  μL per test) |
| Chemical compound, drug | Oligomycin | Abcam | Cat# ab141829; CAS: 1404-19-9 | Used 2 μM final concentration |
| Chemical compound, drug | Rotenone | Abcam | Cat# ab143145 CAS: 83-79-4 | Used 1 μM final concentration |
| Chemical compound, drug | Antimycin A | Sigma-Aldrich | Cat# A8674;  CAS: 1397-94-0 | Used 1 μM final concentration |
| Chemical compound, drug | Carbonyl cyanide-4-(trifluoromethoxy)phenylhydrazone (FCCP) | Santa Cruz Biotechnology | Cat# sc203578  CAS: 370-86-5 | Used 0.5 μM final concentration |
| Chemical compound, drug | Phorbol 12-myristate 13-acetate (PMA) | Sigma-Aldrich | Cat# P8139;  CAS: 16561-29-8 | Used 20 ng/mL final concentration |
| Chemical compound, drug | Ionomycin calcium salt from *Streptomyces conglobatus* | Sigma-Aldrich | Cat# I0634;  CAS: 56092-82-1 | Used 1 μg/mL final concentration |
| Chemical compound, drug | Brefeldin A | Cell Signaling Technology | Cat# 9972S;  CAS: 20350-15-6 | Used 10 μg/mL final concentration |
| Commercial assay or kit | BCA protein assay kit | ThermoFisher Scientific | Cat# 23227 |  |
| Commercial assay or kit | Seahorse XF24 FluxPak | Agilent | Cat# 102070-00 |  |
| Commercial assay or kit | Foxp3/Transcription factor staining buffer set | ThermoFisher Scientific | Cat# 00-5523-00 |  |
| Commercial assay or kit | TruSeq stranded mRNA library prep kit | Illumina | Cat# RS-122-2101 |  |
| Commercial assay or kit | Dynabeads sheep anti-rat IgG | ThermoFisher Scientific | Cat # 11035 |  |
| Software, algorithm | STRING | von Mering *et al*. 2005 | https://string-db.org/ |  |
| Software, algorithm | DAVID | Huang *et al*. 2009 | https://david-d.ncifcrf.gov/ |  |
| Other | Thioglycollate medium | Sigma-Aldrich | Cat# T9032 |  |
| Other | Bovine serum albumin, fatty acid free | Gemini Bio-Products | Cat# 700-107P |  |
| Other | Collagen I protein, rat tail | ThermoFisher Scientific | Cat# A1048301 |  |
| Other | Collagenase type IV | ThermoFisher Scientific | Cat# 17104019 |  |
| Other | Recombinant DNase I, RNase-free | Affymetrix | Cat# 78411 |  |
