# Supplementary figures and images for: Bmal1 integrates mitochondrial metabolism and macrophage activation
Source: eLife journal article supplement (doi:10.7554/elife.54090), 2020-05-12

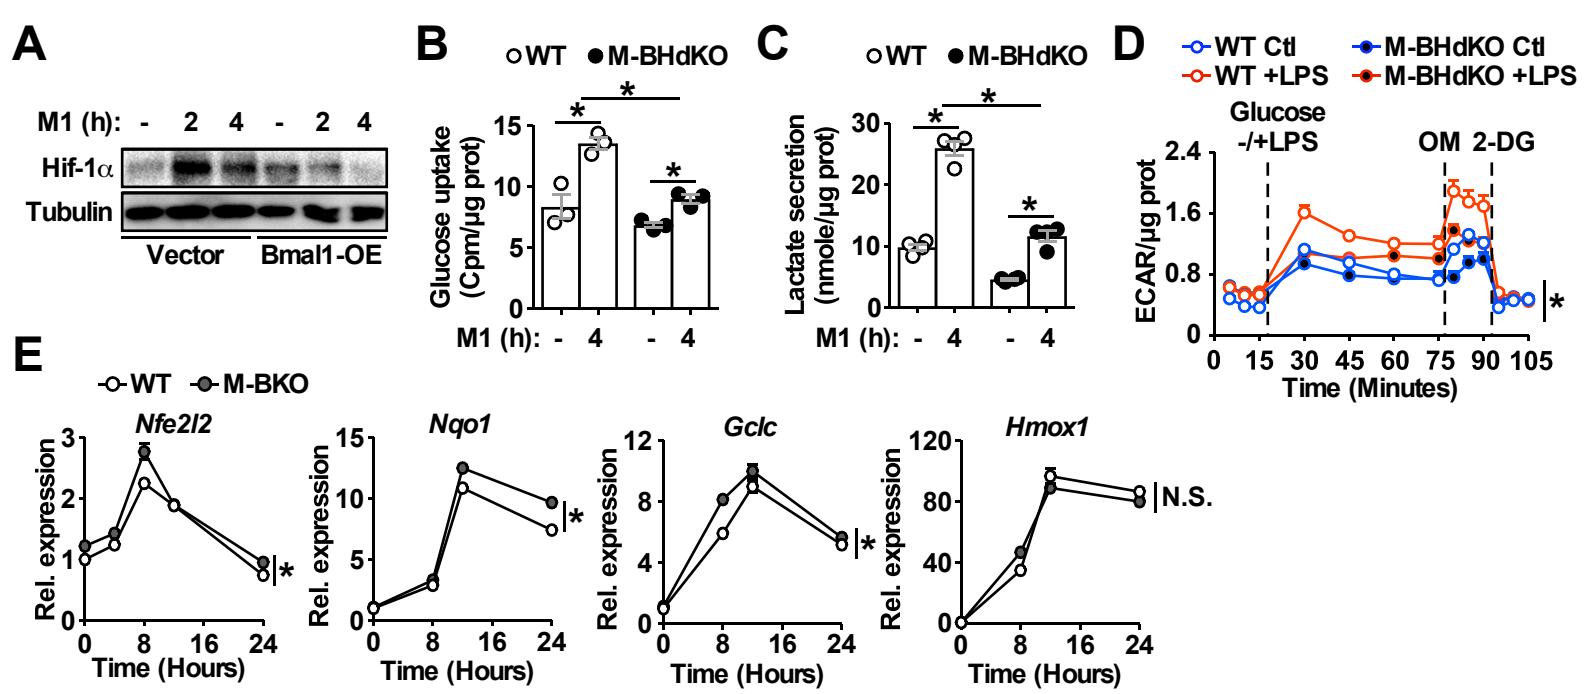

Fig. 4 Supplemental figure 1

Supplement: supp [file elife-54090-supp-v1.zip]

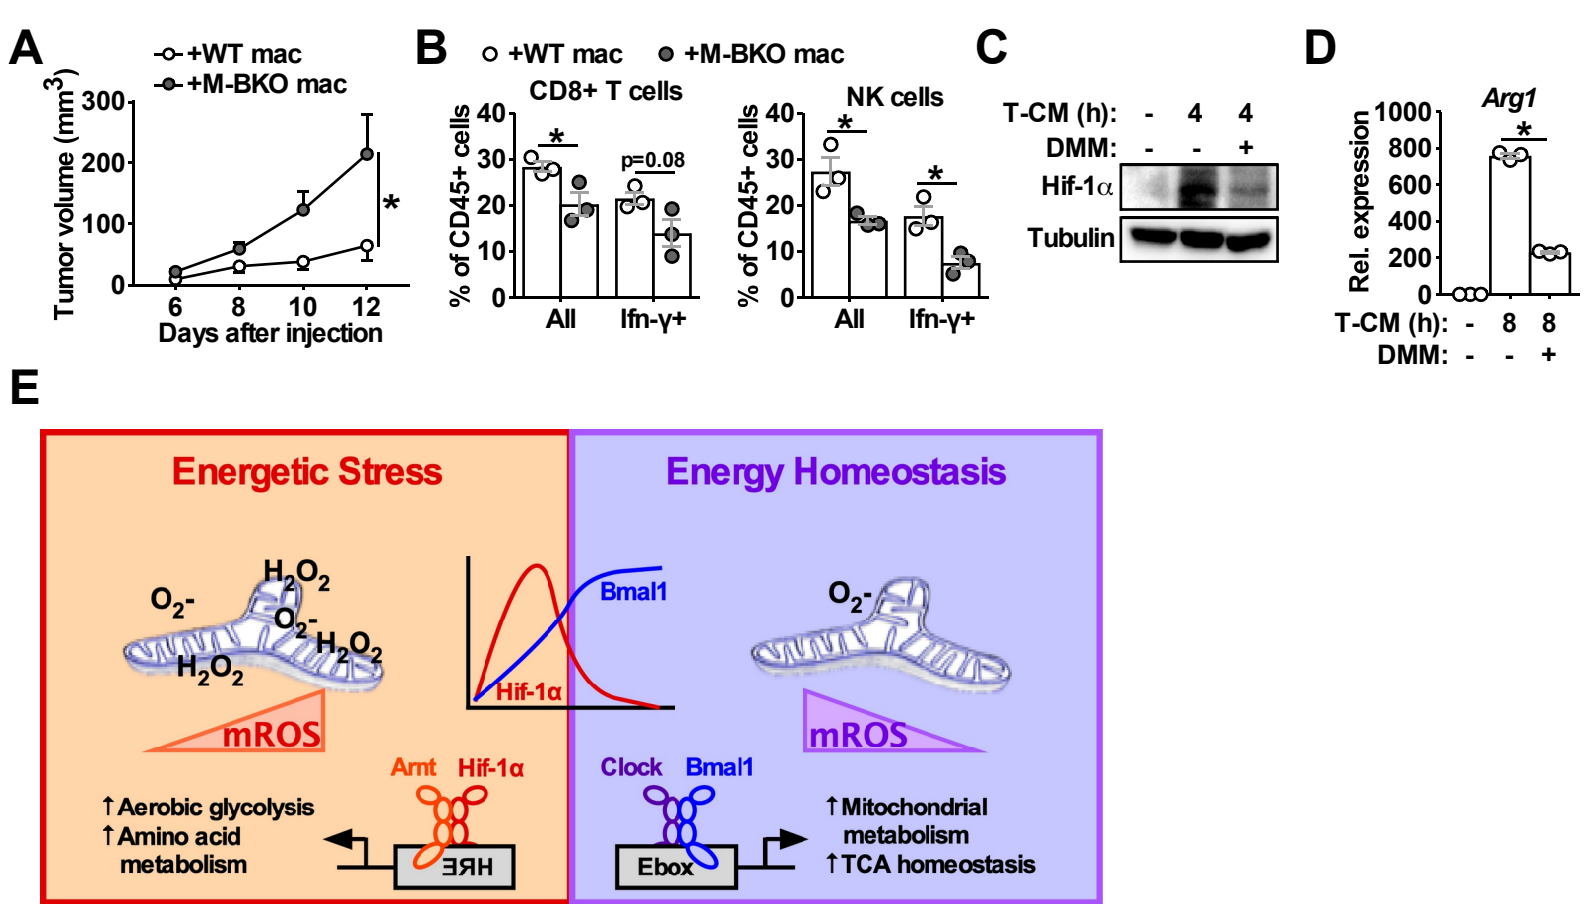

Fig. 7 Supplemental figure 1

Supplement: supp [file elife-54090-supp-v1.zip]

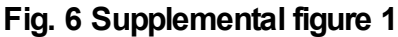

### Fig. 6 Supplemental figure 1

Supplement: supp [file elife-54090-supp-v1.zip]

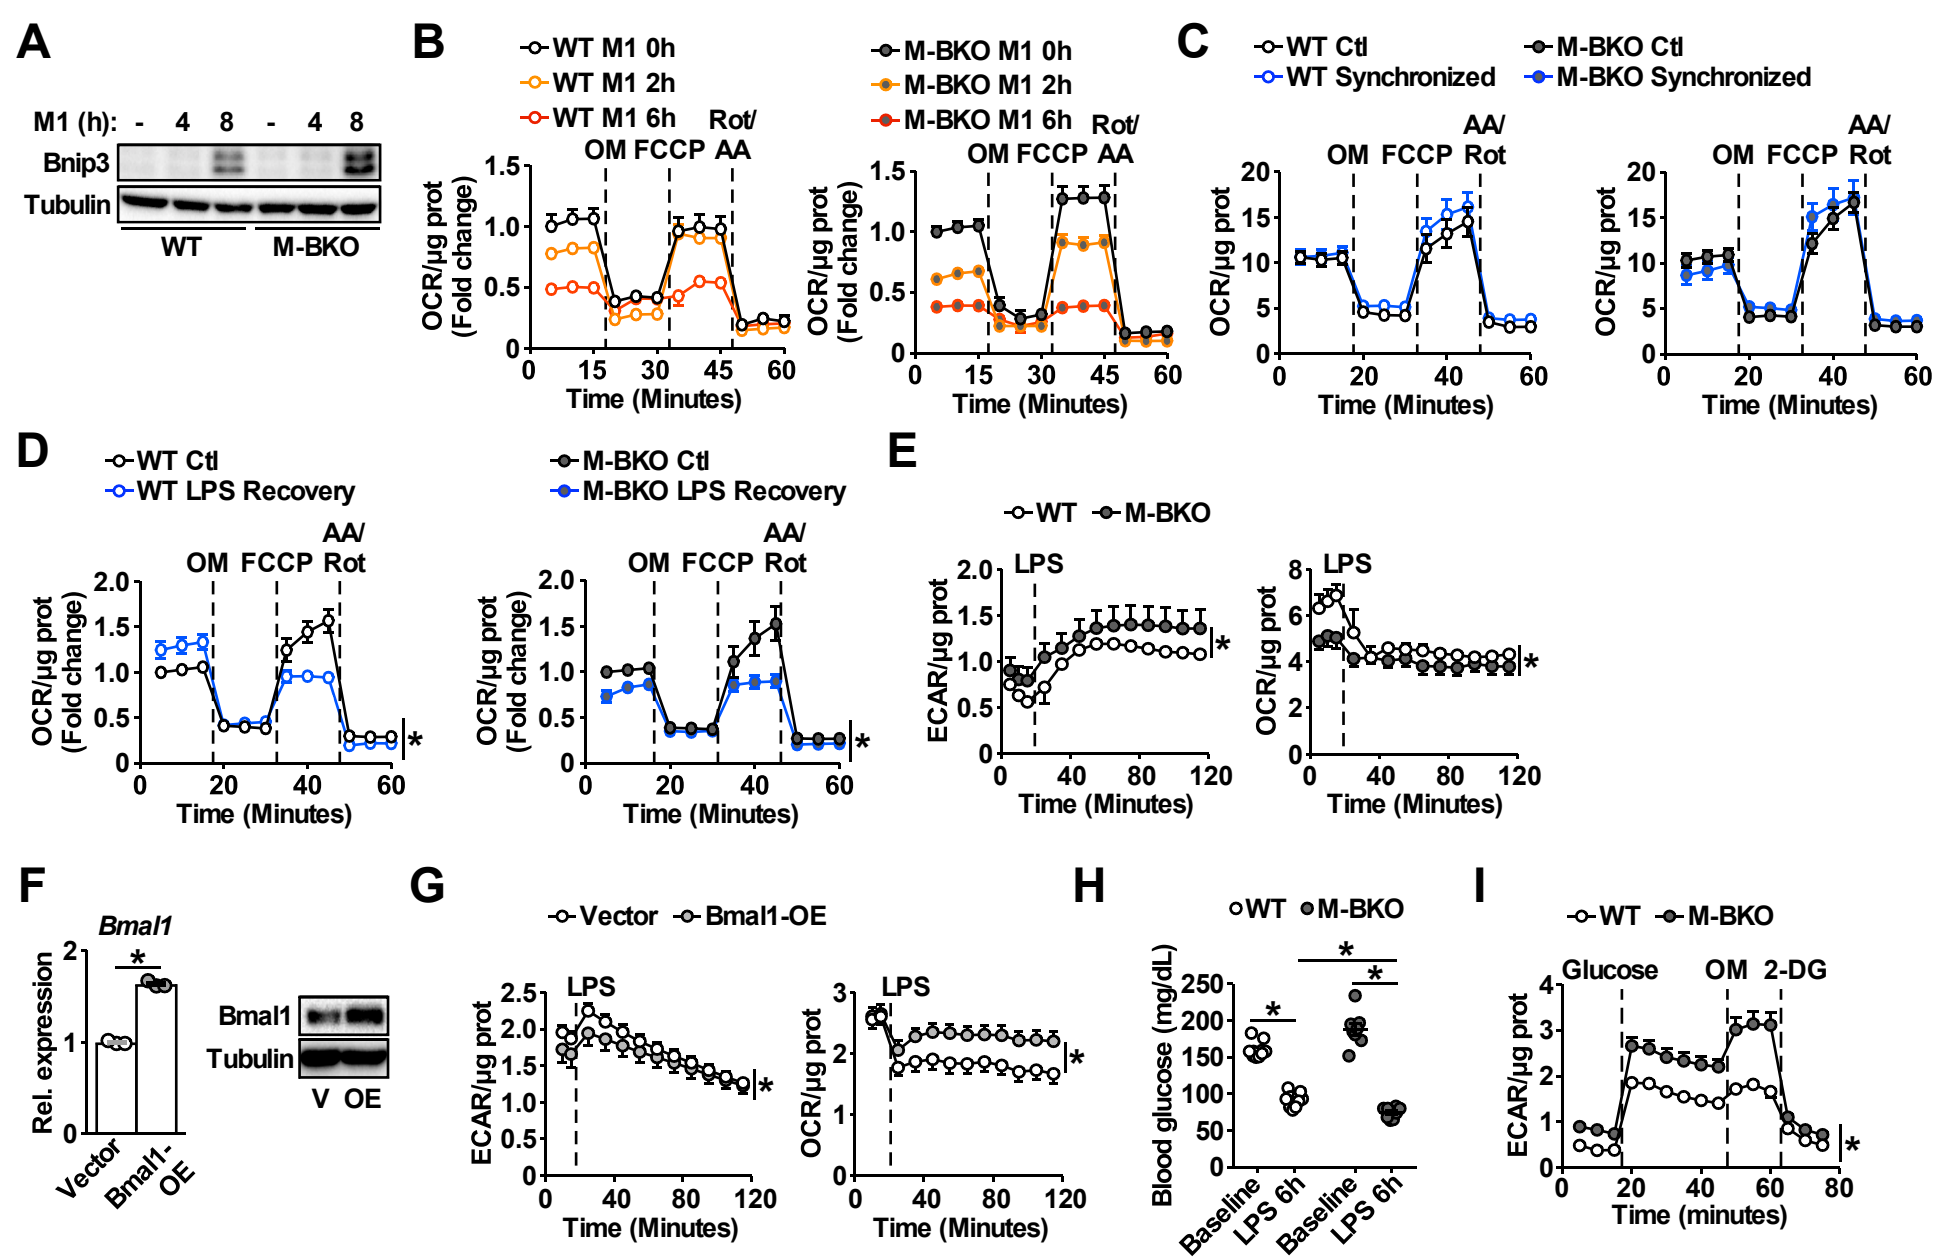

Fig. 2 Supplemental figure 1.

Supplement: supp [file elife-54090-supp-v1.zip]
